# Supplementary material
Source: publisher figshare collection journal article supplement (https://gsajournals.figshare.com/articles/dataset/_/13635050)
Supplement: Supplementary file 1 [file 1]

## Sheet: Header Description
TableS1.txt - Tab delimited text file with information on 1011 strains derived from Peter et al 2018 Table S1, estimated levels of heterozygosity, and allele calls at the SSD1 locus (see Methods). Bellow is a description of each column:
Isolate name: Strain name, as defined in the original Supplementary Table S1 in Peter et al 2018;
Standardized name: Secondary strain name, as defined in the original Supplementary Table S1 in Peter et al 2018;
Isolation: Detailed isolation substrate, as defined in the original Supplementary Table S1 in Peter et al 2018;
Ecological groups: General ecology where strains where isolated from, as defined in the original Supplementary Table S1 in Peter et al 2018;
wine_eco: A more specific classification of Ecological groups (Fruit, Must, Wine/winemaking, Unknown, Vineyard) of the Wine ecology;
Geographical origins: Location where each strain was isolated, as defined in the original Supplementary Table S1 in Peter et al 2018;
HO deletion: Yes/no information on whether strains had their HO locus deleted, as defined in the original Supplementary Table S1 in Peter et al 2018;
SSD1_allele: Classification os SSD1 allele (A or B) based on each strain's Ssd1 amino acid sequence;
Ploidy: Ploidy of each strain, as defined in the original Supplementary Table S1 in Peter et al 2018;
Aneuploidies: Aneuploidy of each strain, as defined in the original Supplementary Table S1 in Peter et al 2018;
Aneuploidy_type: Categorization of each strain according to the type of aneuploidy (gain, loss, both, 1only, euploid);
Mean coverage: Average coverage of each genome sequence, as defined in the original Supplementary Table S1 in Peter et al 2018;
Clades: Genetic clades, as defined in the original Supplementary Table S1 in Peter et al 2018;
Collection/provider: Institution responsible for collecting each strain, as defined in the original Supplementary Table S1 in Peter et al 2018;
Reference: Original study where strains were described, as defined in the original Supplementary Table S1 in Peter et al 2018;
Heterozygosity: Level of heterozygosity of each strain (see Methods);
basename: Strain names used in the alignments files;
ssd1geno: Classification of each strain according to its SSD1 genotype (AA, BB, or AB);
ssd1het: Classification of each strain according to the heterozygosity of the SSD1 amino acid sequence (hom - homozygous; het - heterozygous);
chr1only: Gain of chr 1 only (TRUE/FALSE).

## Sheet: Scopel_GENETICS_TableS1
Isolate name	Standardized name	Isolation	Ecological origins	wine_eco	Geographical origins	HO deletion	SSD1_allele	Ploidy	Aneuploidies	Aneuploidy_type	Zygosity	Mean coverage	Clades	Collection / Provider	Reference	heterozygosity	basename	ssd1geno	ssd1het	chr1only
#03	BCS	Evolution canyon	Nature	Nature	Israel	no	B	2	euploid	Euploid	heterozygous	229	8. Mixed origin	Comenius University in Bratislava (Josef Nosek) and University of Haifa (Eviatar Nevo)	16	0.000821943	3	AB	het	FALSE
#05	BCT	Evolution canyon	Nature	Nature	Israel	no	B	2	euploid	Euploid	heterozygous	248	8. Mixed origin	Comenius University in Bratislava (Josef Nosek) and University of Haifa (Eviatar Nevo)	16	0.00298472	5	AB	het	FALSE
#13	BDD	Evolution canyon	Nature	Nature	Israel	no	A	2	euploid	Euploid	heterozygous	223	M. Mosaic	Comenius University in Bratislava (Josef Nosek) and University of Haifa (Eviatar Nevo)	16	0.00144936	13	AA	hom	FALSE
#14	BDE	Evolution canyon	Nature	Nature	Israel	no	A	3	aneu;-1*3;	Loss	heterozygous	203	M. Mosaic	Comenius University in Bratislava (Josef Nosek) and University of Haifa (Eviatar Nevo)	16	0.00170989	14	AA	hom	FALSE
#23	BCR	Evolution canyon	Nature	Nature	Israel	no	B	4	aneu;+1*8;	Gain	heterozygous	215	8. Mixed origin	Comenius University in Bratislava (Josef Nosek) and University of Haifa (Eviatar Nevo)	16	0.00539206	23	AB	het	FALSE
#33	BCV	Evolution canyon	Nature	Nature	Israel	no	A	2	euploid	Euploid	heterozygous	219	M. Mosaic	Comenius University in Bratislava (Josef Nosek) and University of Haifa (Eviatar Nevo)	16	0.00116598	33	AA	hom	FALSE
#34	BDA	Evolution canyon	Nature	Nature	Israel	no	A	2	aneu;+1*1;	1only	heterozygous	200	M. Mosaic	Comenius University in Bratislava (Josef Nosek) and University of Haifa (Eviatar Nevo)	16	0.0015812	34	AA	hom	TRUE
#35	BDB	Evolution canyon	Nature	Nature	Israel	no	A	2	euploid	Euploid	heterozygous	215	M. Mosaic	Comenius University in Bratislava (Josef Nosek) and University of Haifa (Eviatar Nevo)	16	0.0011169	35	AA	hom	FALSE
#36	BDC	Evolution canyon	Nature	Nature	Israel	no	A	2	aneu;+1*1;	1only	heterozygous	239	M. Mosaic	Comenius University in Bratislava (Josef Nosek) and University of Haifa (Eviatar Nevo)	16	0.00267917	36	AA	hom	TRUE
#57	BDF	Evolution canyon	Nature	Nature	Israel	no	A	2	aneu;+1*1;	1only	heterozygous	227	M. Mosaic	Comenius University in Bratislava (Josef Nosek) and University of Haifa (Eviatar Nevo)	16	0.00240941	57	AA	hom	TRUE
#58	BDG	Evolution canyon	Nature	Nature	Israel	no	A	2	aneu;+1*1;	1only	heterozygous	229	M. Mosaic	Comenius University in Bratislava (Josef Nosek) and University of Haifa (Eviatar Nevo)	16	0.00245139	58	AA	hom	TRUE
#59	BDH	Evolution canyon	Nature	Nature	Israel	no	A	2	euploid	Euploid	heterozygous	217	M. Mosaic	Comenius University in Bratislava (Josef Nosek) and University of Haifa (Eviatar Nevo)	16	0.00147005	59	AA	hom	FALSE
#60	BDI	Evolution canyon	Nature	Nature	Israel	no	A	2	aneu;+1*1;	1only	heterozygous	233	M. Mosaic	Comenius University in Bratislava (Josef Nosek) and University of Haifa (Eviatar Nevo)	16	0.00146067	60	AA	hom	TRUE
#63	BDK	Evolution canyon	Nature	Nature	Israel	no	B	2	aneu;+1*1;	1only	homozygous	219	M. Mosaic	Comenius University in Bratislava (Josef Nosek) and University of Haifa (Eviatar Nevo)	16	0.000290725	63	BB	hom	TRUE
1	CBK	Chalcidoidea	Insect	Insect	Schleswig-Holstein	no	A	1	euploid	Euploid	homozygous	233	M. Mosaic	Max Planck Institute for Evolutionary Biology (Duncan Greig)	Peter	0.000257413	1	AA	hom	FALSE
2021-01-09	CBB	Wine conserved in amphora	Wine	Wine	Georgia	no	A	2	euploid	Euploid	heterozygous	226	1. Wine/European	University of Basilicata (Angela Capece and Patrizia Romano)	7	0.00054677	1_9	AA	het	FALSE
1.3_Safale_US05	CFD	Carlsberg Beer, American Ale yeast	Beer	Beer	USA	no	B	4	aneu;-1*1;-1*5;+1*6;-1*12;	Both	heterozygous	190	11. Ale beer	Carlsberg	Peter	0.00314127	WLP001	AB	het	FALSE
1.6_Safale_S40	CFG	Carlsberg Beer	Beer	Beer	UK	no	A	4	aneu;-1*6;	Loss	heterozygous	276	11. Ale beer	Carlsberg	Peter	0.00450339	Safale_S40	AA	het	FALSE
2021-11-18	CAD	Wine conserved in amphora	Wine	Wine	Georgia	no	A	2	euploid	Euploid	heterozygous	269	1. Wine/European	University of Basilicata (Angela Capece and Patrizia Romano)	7	0.000519357	11_18	AA	hom	FALSE
2021-11-02	CAP	Wine conserved in amphora	Wine	Wine	Georgia	no	A	2	euploid	Euploid	heterozygous	272	1. Wine/European	University of Basilicata (Angela Capece and Patrizia Romano)	7	0.000384552	11_2	AA	hom	FALSE
2021-11-08	CAB	Wine conserved in amphora	Wine	Wine	Georgia	no	A	2	euploid	Euploid	heterozygous	265	1. Wine/European	University of Basilicata (Angela Capece and Patrizia Romano)	7	0.000533473	11_8	AA	hom	FALSE
1175	CPD	Spoiled beer	Beer	Beer	NA	no	A	2	aneu;+1*8;	Gain	heterozygous	230	7. Mosaic beer	Instituto de Agroqu‚Äômica y Tecnolog‚Äôa de los Alimentos (IATA)-CSIC (Amparo Querol)	Peter	0.00088597	1175	AA	hom	FALSE
1216	CPE	Unknown	Unknown	Unknown	El Sauzal, Tenerife, Spain	no	A	2	aneu;+1*1;	1only	homozygous	244	1. Wine/European	Instituto de Agroqu‚Äômica y Tecnolog‚Äôa de los Alimentos (IATA)-CSIC (Amparo Querol)	Peter	0.000200133	1216	AA	hom	TRUE
1235	CPF	Unknown	Unknown	Unknown	Guimar, Tenerife, Spain	no	A	2	aneu;+1*2;+1*4;+1*8;+1*9;+1*13;+1*15;	Gain	heterozygous	316	1. Wine/European	Instituto de Agroqu‚Äômica y Tecnolog‚Äôa de los Alimentos (IATA)-CSIC (Amparo Querol)	Peter	0.000689793	1235	AA	hom	FALSE
1560	CPG	Manzanilla-Alorena, olive (Noe), 2003	Nature	Nature	Aceituna, Spain	no	A	2	euploid	Euploid	homozygous	271	2. Alpechin	Instituto de Agroqu‚Äômica y Tecnolog‚Äôa de los Alimentos (IATA)-CSIC (Amparo Querol)	Peter	0.000354692	1560	AA	hom	FALSE
1663	BBP	Flower of Centaurea alba	Flower	Flower	Spain	no	A	2	euploid	Euploid	heterozygous	207	8. Mixed origin	Instituto de Agroqu‚Äômica y Tecnolog‚Äôa de los Alimentos (IATA)-CSIC (Amparo Querol)	Peter	0.00322579	1663	AA	het	FALSE
2	CBL	Chalcidoidea	Insect	Insect	Schleswig-Holstein	no	B	2	euploid	Euploid	heterozygous	189	M. Mosaic	Max Planck Institute for Evolutionary Biology (Duncan Greig)	Peter	0.00506463	2	AB	het	FALSE
2.6_Windsor_British	CFI	Carlsberg Beer	Beer	Beer	UK	no	B	4	aneu;+1*9;	Gain	heterozygous	253	8. Mixed origin	Carlsberg	Peter	0.00595917	WLP013	AB	het	FALSE
21-4-101	ALM	River water (Danube)	Water	Water	Bratislava, Slovakia	no	A	2	aneu;+1*9;	Gain	heterozygous	203	1. Wine/European	Culture collection of Yeast (Renata Vadkertiova)	Peter	0.000668944	21_4_101	AA	hom	FALSE
21-4-103	ALN	River water (Morava)	Water	Water	Bratislava, Deninska Nova Ves, Slovakia	no	B	2	euploid	Euploid	heterozygous	218	8. Mixed origin	Culture collection of Yeast (Renata Vadkertiova)	Peter	0.00359705	21_4_103	AB	het	FALSE
21-4-105	ALP	River water Morava	Water	Water	Bratislava, Deninska Nova Ves, Slovakia	no	A	2	aneu;+1*9;	Gain	heterozygous	223	8. Mixed origin	Culture collection of Yeast (Renata Vadkertiova)	Peter	0.0033113	21_4_105	AA	het	FALSE
21-4-111	ALQ	Leaves of Prunus domestica L., 'Stanley'	Tree	Tree	Male Zaluzie, Slovakia	no	A	2	euploid	Euploid	homozygous	251	1. Wine/European	Culture collection of Yeast (Renata Vadkertiova)	Peter	0.000183514	21_4_111	AA	hom	FALSE
21-4-114	ALR	Leaves of peach tree (Prunus armeniaca)	Tree	Tree	Male levare, Slovakia	no	B	3	aneu;+1*9;+1*11;+1*12;	Gain	heterozygous	222	M. Mosaic	Culture collection of Yeast (Renata Vadkertiova)	Peter	0.00470523	21_4_114	AB	het	FALSE
21-4-116	ALS	Blossom of apple tree (Malus domestica)	Flower	Flower	Male levare, Slovakia	no	A	2	euploid	Euploid	homozygous	228	1. Wine/European	Culture collection of Yeast (Renata Vadkertiova)	Peter	0.000183611	21_4_116	AA	hom	FALSE
21-4-122	ALT	Blossoms of apricot tree (Prunus armeniaca)	Flower	Flower	Male Zaluzie, Slovakia	no	A	2	euploid	Euploid	homozygous	222	1. Wine/European	Culture collection of Yeast (Renata Vadkertiova)	Peter	0.000187181	21_4_122	AA	hom	FALSE
21-4-124	ALV	Fruit of plum tree (Prunus domestica L., 'Stanley')	Fruit	Fruit	Male Zaluzie, Slovakia	no	B	3	aneu;+1*1;+1*7;+1*9;+1*11;	Gain	heterozygous	195	8. Mixed origin	Culture collection of Yeast (Renata Vadkertiova)	Peter	0.00549484	21_4_124	AB	het	FALSE
21-4-125	AMA	Fruit of plum tree (Prunus domestica L., 'Stanley')	Fruit	Fruit	Male Zaluzie, Slovakia	no	A	3	euploid	Euploid	heterozygous	232	1. Wine/European	Culture collection of Yeast (Renata Vadkertiova)	Peter	0.000897541	21_4_125	AA	het	FALSE
21-4-99	ALL	River water (Danube)	Water	Water	Bratislava, Slovakia	no	A	2	euploid	Euploid	heterozygous	263	1. Wine/European	Culture collection of Yeast (Renata Vadkertiova)	Peter	0.000712021	21_4_99	AA	hom	FALSE
2162	BBQ	Forest soil, 30C	Soil	Soil	Hungary	no	A	2	euploid	Euploid	homozygous	238	4. Mediterranean oak	Instituto de Agroqu‚Äômica y Tecnolog‚Äôa de los Alimentos (IATA)-CSIC (Amparo Querol)	Peter	0.000284178	2162	AA	hom	FALSE
2163	BBR	Quercus faginea, 30C	Tree	Tree	Castellon, Spain	no	B	2	euploid	Euploid	homozygous	236	NA	Instituto de Agroqu‚Äômica y Tecnolog‚Äôa de los Alimentos (IATA)-CSIC (Amparo Querol)	Peter	0.000382487	2163	BB	hom	FALSE
2187	BBS	Forest soil, 30C	Soil	Soil	Hungary	no	A	2	euploid	Euploid	homozygous	327	4. Mediterranean oak	Instituto de Agroqu‚Äômica y Tecnolog‚Äôa de los Alimentos (IATA)-CSIC (Amparo Querol)	Peter	0.000279932	2187	AA	hom	FALSE
2281	BBT	Grapes, Picudo variety	Wine	Fruit	Valdevimbre, Spain	no	A	3	euploid	Euploid	heterozygous	239	M. Mosaic	Instituto de Agroqu‚Äômica y Tecnolog‚Äôa de los Alimentos (IATA)-CSIC (Amparo Querol)	Peter	0.00483388	2281	AA	het	FALSE
2282	BBV	Grapes, Verdosilla variety	Wine	Fruit	Tuejar, Spain	no	A	2	aneu;+1*3;	Gain	heterozygous	295	1. Wine/European	Instituto de Agroqu‚Äômica y Tecnolog‚Äôa de los Alimentos (IATA)-CSIC (Amparo Querol)	Peter	0.000575937	2282	AA	het	FALSE
2644	BCA	Human feces	Human, clinical	Human, clinical	Hospital Vall d'Hebron, Barcelona, Spain	no	A	2	euploid	Euploid	heterozygous	183	1. Wine/European	Instituto de Agroqu‚Äômica y Tecnolog‚Äôa de los Alimentos (IATA)-CSIC (Amparo Querol)	Peter	0.000341699	2644	AA	hom	FALSE
2680	BMM	Vagina	Human, clinical	Human, clinical	Vall d'Hebron hospital, Barcelona, Spain	no	B	4	aneu;-1*1;-1*6;+1*7;-1*9;+1*13;+1*15;	Both	heterozygous	220	8. Mixed origin	Instituto de Agroqu‚Äômica y Tecnolog‚Äôa de los Alimentos (IATA)-CSIC (Amparo Querol)	Peter	0.00591586	2680	AB	het	FALSE
269521J	BMF	Human	Human	Human	RVI Newcastle, UK	no	A	2	aneu;+1*1;	1only	heterozygous	308	M. Mosaic	National Collection of Yeast Cultures (NCYC)(Stephen A James, Donald Mackenzie and Ian Roberts)	Peter	0.0040634	269521J	AA	hom	TRUE
2698	BMN	Faringe	Human, clinical	Human, clinical	Vall d'Hebron hospital, Barcelona, Spain	no	A	2	euploid	Euploid	heterozygous	256	1. Wine/European	Instituto de Agroqu‚Äômica y Tecnolog‚Äôa de los Alimentos (IATA)-CSIC (Amparo Querol)	Peter	0.000345956	2698	AA	hom	FALSE
2720	BMQ	Blood	Human, clinical	Human, clinical	La Fe Hospital,Valencia, Spain	no	A	2	aneu;+1*1;+1*6;+1*7;+1*9;+1*11;+1*12;+1*13;	Gain	heterozygous	58	M. Mosaic	Instituto de Agroqu‚Äômica y Tecnolog‚Äôa de los Alimentos (IATA)-CSIC (Amparo Querol)	Peter	0.00473828	2720	AA	het	FALSE
273614N	SACE_MAA	Royal Victoria Infirmary, Newcastle UK, Galloway A Clinical isolate (Fecal) Mackenzie D	Human, clinical	Human, clinical	Newcastle, UK	no	A	2	euploid	Euploid	homozygous	49	M. Mosaic	NA	17	0.000163988	273614N	AA	hom	FALSE
3	CBM	Chalcidoidea	Insect	Insect	Forest of Nehmten in Schleswig-Holstein	no	B	2	euploid	Euploid	heterozygous	250	M. Mosaic	Max Planck Institute for Evolutionary Biology (Duncan Greig)	Peter	0.00494336	3	AB	het	FALSE
3.3_Safale_S-33	CFN	Carlsberg Beer	Beer	Beer	NA	no	B	4	aneu;+1*2;+1*9;	Gain	heterozygous	277	8. Mixed origin	Carlsberg	Peter	0.00588085	WLP006	AB	het	FALSE
3.4_Safbrew_T-58	CFP	Carlsberg Beer	Beer	Beer	NA	no	B	4	euploid	Euploid	heterozygous	225	8. Mixed origin	Carlsberg	Peter	0.00600449	WLP565	AB	het	FALSE
319-5C	CHH	Bakery	Bakery	Bakery	France	no	B	2	aneu;+1*7;	Gain	heterozygous	150	8. Mixed origin	INRA Moulon, France (Sicard D.)	Peter	0.00341146	319_5C	AB	het	FALSE
324-6C	CHG	Bakery	Bakery	Bakery	Vietnam	no	B	2	euploid	Euploid	heterozygous	225	8. Mixed origin	INRA Moulon, France (Sicard D.)	Peter	0.0035395	324_6C	AB	het	FALSE
368428S	BME	Human	Human	Human	RVI Newcastle, UK	no	A	3	aneu;+1*9;	Gain	heterozygous	325	5. French dairy	National Collection of Yeast Cultures (NCYC)(Stephen A James, Donald Mackenzie and Ian Roberts)	Peter	0.00564391	368428S	AA	het	FALSE
378604X	SACE_MAB	Clinical sputum	Human, clinical	Human, clinical	Newcastle, UK	no	A	2	euploid	Euploid	homozygous	46	M. Mosaic	NA	17	0.00019256	378604X	AA	hom	FALSE
384103A	BMD	Human	Human	Human	RVI Newcastle, UK	no	B	2	euploid	Euploid	heterozygous	285	M. Mosaic	National Collection of Yeast Cultures (NCYC)(Stephen A James, Donald Mackenzie and Ian Roberts)	Peter	0.00409619	384103A	AB	het	FALSE
4.5_WLP530	CFC	Carlsberg Beer, Abbey ale yeast (Westmalle brewery)	Beer	Beer	Westmalle, Belgium	no	B	4	aneu;-1*12;	Loss	heterozygous	216	11. Ale beer	Carlsberg	Peter	0.004821	WLP530	AB	het	FALSE
4.9_WLP099	CFE	Carlsberg Beer, super high gravity	Beer	Beer	United Kingdom	no	A	2	euploid	Euploid	heterozygous	272	1. Wine/European	Carlsberg	Peter	0.000688379	WLP099	AA	het	FALSE
4LBI-3	BVK	Spontaneous grape fermentation	Wine	Must	Basilicata, Italy	no	A	2	euploid	Euploid	homozygous	230	1. Wine/European	University of Basilicata (Angela Capece and Patrizia Romano)	Peter	0.000153312	4LBI_3	AA	hom	FALSE
2021-05-18	CAA	Wine conserved in amphora	Wine	Wine	Georgia	no	A	2	euploid	Euploid	heterozygous	260	1. Wine/European	University of Basilicata (Angela Capece and Patrizia Romano)	7	0.000436142	5_18	AA	hom	FALSE
2021-05-02	CAQ	Wine conserved in amphora	Wine	Wine	Georgia	no	A	2	euploid	Euploid	heterozygous	228	1. Wine/European	University of Basilicata (Angela Capece and Patrizia Romano)	7	0.000513323	5_2	AA	hom	FALSE
5.5_WLP090	CFM	Carlsberg Beer, \\\\\\\\"San Diego Super Yeast\\\\"\\\\""	Beer	Beer	San Diego, USA	no	B	4	aneu;-1*1;-1*5;-1*9;	Loss	heterozygous	258	11. Ale beer	Carlsberg	Peter	0.00330565	WLP090	AB	het	FALSE
6.2_WLP570	CFF	Carlsberg Beer	Beer	Beer	Belgium	no	A	2	euploid	Euploid	heterozygous	254	7. Mosaic beer	Carlsberg	Peter	0.00242778	WLP570	AA	hom	FALSE
646-3B	CHI	Bakery	Bakery	Bakery	USA	no	B	2	euploid	Euploid	heterozygous	177	8. Mixed origin	INRA Moulon, France (Sicard D.)	Peter	0.00370093	646_3B	AB	het	FALSE
77	BTB	Baker's yeast	Bakery	Bakery	NA	no	B	3	aneu;+1*1;	1only	heterozygous	211	M. Mosaic	National Collection of Yeast Cultures (NCYC)(Stephen A James and Ian Roberts)	Peter	0.00317287	77	BB	het	TRUE
79	BTC	Fleischmann baker's yeast.	Bakery	Bakery	NA	no	A	2	euploid	Euploid	heterozygous	235	8. Mixed origin	National Collection of Yeast Cultures (NCYC)(Stephen A James and Ian Roberts)	Peter	0.00273968	79	AA	hom	FALSE
2021-08-15	BVV	Wine conserved in amphora	Wine	Wine	Georgia	no	A	2	euploid	Euploid	heterozygous	226	1. Wine/European	University of Basilicata (Angela Capece and Patrizia Romano)	7	0.000502894	8_15	AA	hom	FALSE
2021-08-03	CAN	Wine conserved in amphora	Wine	Wine	Georgia	no	A	2	aneu;+1*9;	Gain	heterozygous	188	1. Wine/European	University of Basilicata (Angela Capece and Patrizia Romano)	7	0.000573733	8_3	AA	hom	FALSE
2021-09-07	CAM	Wine conserved in amphora	Wine	Wine	Georgia	no	A	2	euploid	Euploid	heterozygous	179	1. Wine/European	University of Basilicata (Angela Capece and Patrizia Romano)	7	0.000503472	9_7	AA	hom	FALSE
906	CPA	Must from various Agave sp.	Nature	Nature	Mexico	no	A	2	euploid	Euploid	heterozygous	299	NA	Instituto de Agroqu‚Äômica y Tecnolog‚Äôa de los Alimentos (IATA)-CSIC (Amparo Querol)	Peter	0.00218588	906	AA	hom	FALSE
908	BBM	Raicilla (Mexican distilled spirit)	Distillery	Distillery	Jalisco, Mexico	no	A	2	euploid	Euploid	homozygous	279	NA	Instituto de Agroqu‚Äômica y Tecnolog‚Äôa de los Alimentos (IATA)-CSIC (Amparo Querol)	Peter	0.000306449	908	AA	hom	FALSE
995	CPB	Fermented beverage from raisins and sugar	Beer	Beer	Hungary	no	A	2	aneu;+1*3;	Gain	heterozygous	159	M. Mosaic	Instituto de Agroqu‚Äômica y Tecnolog‚Äôa de los Alimentos (IATA)-CSIC (Amparo Querol)	Peter	0.00158561	995	AA	het	FALSE
997	CPC	Apricot pulp	Fruit	Fruit	Hungary	no	B	2	euploid	Euploid	heterozygous	203	M. Mosaic	Instituto de Agroqu‚Äômica y Tecnolog‚Äôa de los Alimentos (IATA)-CSIC (Amparo Querol)	Peter	0.00393037	997	AB	het	FALSE
A-12	CAC	Wine conserved in amphora	Wine	Wine	Georgia	no	A	2	euploid	Euploid	heterozygous	236	1. Wine/European	University of Basilicata (Angela Capece and Patrizia Romano)	7	0.000504619	A_12	AA	hom	FALSE
A-14	CBA	Wine conserved in amphora	Wine	Wine	Georgia	no	A	2	euploid	Euploid	heterozygous	229	1. Wine/European	University of Basilicata (Angela Capece and Patrizia Romano)	7	0.000858201	A_14	AA	hom	FALSE
A-16	CAK	Wine conserved in amphora	Wine	Wine	Georgia	no	A	2	euploid	Euploid	heterozygous	337	1. Wine/European	University of Basilicata (Angela Capece and Patrizia Romano)	7	0.00124189	A_16	AA	hom	FALSE
A-18	ANM	Sorghum beer	Beer	Beer	Ghana	no	A	4	euploid	Euploid	heterozygous	211	6. African beer	The Royal Veterinary and Agricultural University (Lene Jespersen)	14	0.00347932	A_18	AA	het	FALSE
A-19	CAL	Wine conserved in amphora	Wine	Wine	Georgia	no	A	2	euploid	Euploid	heterozygous	232	1. Wine/European	University of Basilicata (Angela Capece and Patrizia Romano)	7	0.00127979	A_19	AA	hom	FALSE
A-6	ANL	Sorghum beer	Beer	Beer	Ghana	no	A	4	euploid	Euploid	heterozygous	207	6. African beer	The Royal Veterinary and Agricultural University (Lene Jespersen)	14	0.00359633	A_6	AA	het	FALSE
A-9	CAR	Wine conserved in amphora	Wine	Wine	Georgia	no	A	2	euploid	Euploid	homozygous	195	1. Wine/European	University of Basilicata (Angela Capece and Patrizia Romano)	7	0.000145108	A_9	AA	hom	FALSE
AGME_5I	CRI	Wine	Wine	Wine	Italy	no	A	2	aneu;+1*4;+1*8;+1*15;	Gain	homozygous	293	1. Wine/European	University of Basilicata (Angela Capece and Patrizia Romano)	Peter	0.000161615	AGME_5I	AA	hom	FALSE
ATCC_38618:2-2	CEN	Concentrated orange juice	Fruit	Fruit	NA	no	B	2	aneu;+1*11;+1*13;	Gain	heterozygous	199	M. Mosaic	State Research Institute of Genetics and Selection of Industrial Microorganisms (Naumov G.I.)	Peter	0.000431494	ATCC_38618:2-2	BB	hom	FALSE
ATCC_52922-1C	CEP	Tapuy (rice wine)	Fermentation	Fermentation	Philippines	no	B	2	aneu;+1*8;	Gain	homozygous	295	NA	State Research Institute of Genetics and Selection of Industrial Microorganisms (Naumov G.I.)	Peter	0.00024403	ATCC_52922_1C	BB	hom	FALSE
ATCC_66348-1D	CDB	Soil	Soil	Soil	Japan	no	B	2	euploid	Euploid	homozygous	192	NA	State Research Institute of Genetics and Selection of Industrial Microorganisms (Naumov G.I.)	Peter	0.000361264	ATCC_66348_1D	BB	hom	FALSE
AY529516	ANN	Cocoa bean fermentation	Fermentation	Fermentation	Ghana	no	A	2	euploid	Euploid	heterozygous	207	12. West African cocoa	The Royal Veterinary and Agricultural University (Lene Jespersen)	21	0.0022757	AY529516	AA	hom	FALSE
B-11	CBD	Wine conserved in amphora	Wine	Wine	Georgia	no	A	2	euploid	Euploid	homozygous	179	1. Wine/European	University of Basilicata (Angela Capece and Patrizia Romano)	7	0.000149902	B_11	AA	hom	FALSE
B-13	CAV	Wine conserved in amphora	Wine	Wine	Georgia	no	A	2	aneu;+1*3;	Gain	homozygous	206	1. Wine/European	University of Basilicata (Angela Capece and Patrizia Romano)	7	0.000151336	B_13	AA	hom	FALSE
B-17	CAS	Wine conserved in amphora	Wine	Wine	Georgia	no	A	2	euploid	Euploid	homozygous	70	1. Wine/European	University of Basilicata (Angela Capece and Patrizia Romano)	7	0.000145175	B_17	AA	hom	FALSE
B-24	BVT	Wine conserved in amphora	Wine	Wine	Georgia	no	A	2	euploid	Euploid	heterozygous	203	1. Wine/European	University of Basilicata (Angela Capece and Patrizia Romano)	7	0.000470707	B_24	AA	hom	FALSE
B-4	CAE	Wine conserved in amphora	Wine	Wine	Georgia	no	A	2	euploid	Euploid	homozygous	352	1. Wine/European	University of Basilicata (Angela Capece and Patrizia Romano)	7	0.000178588	B_4	AA	hom	FALSE
B1	ASP	Unknown	Unknown	Unknown	France	no	B	2	euploid	Euploid	heterozygous	205	8. Mixed origin	Washington University School of Medicine (Justin C Fay)	5	0.00404239	B1	AB	het	FALSE
B10-1	CHQ	Levain from organic flour	Bakery	Bakery	Forcalquier	no	B	2	euploid	Euploid	heterozygous	277	M. Mosaic	INRA Moulon, France (Sicard D.)	Peter	0.00368496	B10_1	AB	het	FALSE
B9b-1	CHN	Levain from organic flour (Renan)	Bakery	Bakery	Gif-sur-Yvette	no	B	2	euploid	Euploid	heterozygous	218	M. Mosaic	INRA Moulon, France (Sicard D.)	Peter	0.00345903	B9b_1	AB	het	FALSE
B9c-1	CHP	Levain from organic flour (Renan)	Bakery	Bakery	Gif-sur-Yvette	no	B	2	euploid	Euploid	heterozygous	224	M. Mosaic	INRA Moulon, France (Sicard D.)	Peter	0.00340981	B9c_1	AB	het	FALSE
Ba-215	CRC	Wine	Wine	Wine	Italy	no	A	2	euploid	Euploid	homozygous	218	1. Wine/European	University of Basilicata (Angela Capece and Patrizia Romano)	Peter	0.00018325	Ba_215	AA	hom	FALSE
BJ20	BAK	Bark from Quercus wutaishanica	Tree	Tree	Dongling Mountain, Beijing, China	no	B	2	euploid	Euploid	homozygous	266	18. Far East Asia	Chinese Academy of Sciences (Feng-Yan Bai)	24	0.000363605	BJ20	BB	hom	FALSE
BJ6	BAI	Persimmon	Fruit	Fruit	Changping, Beijing, China	no	B	2	euploid	Euploid	homozygous	265	18. Far East Asia	Chinese Academy of Sciences (Feng-Yan Bai)	24	0.000384737	BJ6	BB	hom	FALSE
BMQ557	CGL	Unknown	Unknown	Unknown	Hai Phong, North Vietnam	no	B	2	euploid	Euploid	heterozygous	316	26. Asian fermentation	INRA Gringnon, France (Nguyen H.V.)	Peter	0.00111688	BMQ557	BB	hom	FALSE
C-12	CAT	Wine conserved in amphora	Wine	Wine	Georgia	no	A	2	euploid	Euploid	homozygous	197	1. Wine/European	University of Basilicata (Angela Capece and Patrizia Romano)	7	0.000151129	C_12	AA	hom	FALSE
C-3	CAF	Wine conserved in amphora	Wine	Wine	Georgia	no	A	2	euploid	Euploid	homozygous	205	1. Wine/European	University of Basilicata (Angela Capece and Patrizia Romano)	7	0.000168676	C_3	AA	hom	FALSE
C-6	CRL	Wine conserved in amphora	Wine	Wine	Georgia	no	A	2	euploid	Euploid	homozygous	64	1. Wine/European	University of Basilicata (Angela Capece and Patrizia Romano)	7	0.000165607	C_6	AA	hom	FALSE
C10.4	AIL	Clay	Nature	Nature	Cameroon	no	A	2	euploid	Euploid	heterozygous	212	1. Wine/European	NA	3	0.000554122	C10_4	AA	hom	FALSE
C15.1	AIK	Palm nuts	Nature	Nature	Cameroon	no	A	2	euploid	Euploid	heterozygous	278	1. Wine/European	NA	3	0.000270822	C15_1	AA	hom	FALSE
C6.1	AII	Palm wine	Palm wine	Palm wine	Cameroon	no	A	2	aneu;+1*1;	1only	heterozygous	326	1. Wine/European	NA	3	0.000320982	C6_1	AA	hom	TRUE
Ca6	CGS	Fermenting grape must (sweet wine)	Wine	Must	Lebanon	no	A	2	euploid	Euploid	homozygous	235	1. Wine/European	INRA Gringnon, France (Nguyen H.V.)	Peter	0.000206346	Ca6	AA	hom	FALSE
CBS1171	AEB	Brewers top yeast	Beer	Beer	Oranjeboom brewery, Rotterdam, Netherlands	no	A	4	aneu;+1*1;+1*2;+1*15;	Gain	heterozygous	212	11. Ale beer	CBS collection (Nguyen H.V.)	Peter	0.0030243	CBS1171	AA	het	FALSE
CBS1173	AFS	Fruit ilex	Fruit	Fruit	NA	no	A	2	aneu;-1*2;-1*3;-1*4;-1*6;-1*9;-1*10;-1*11;-1*15;-1*16;	Loss	heterozygous	237	NA	CBS collection (Nguyen H.V.)	Peter	0.0012543	CBS1173	AA	hom	FALSE
CBS1175	AQQ	Wine	Wine	Wine	Switzerland	no	A	2	aneu;+1*9;+1*14;	Gain	heterozygous	175	1. Wine/European	CBS collection (Nguyen H.V.)	Peter	0.000346702	CBS1175	AA	hom	FALSE
CBS1190	AQR	Wine	Wine	Wine	Germany	no	A	2	aneu;+1*11;+1*14;	Gain	heterozygous	216	1. Wine/European	CBS collection (Nguyen H.V.)	Peter	0.000533233	CBS1190	AA	hom	FALSE
CBS1192	AHD	Wine	Wine	Wine	NA	yes	A	1	aneu;+1*1;	1only	homozygous	308	1. Wine/European	CBS collection (Nguyen H.V.)	Peter	0.000190847	CBS1192	AA	hom	TRUE
CBS1194	AHE	Wine	Wine	Wine	NA	yes	A	1	aneu;+1*8;	Gain	homozygous	215	1. Wine/European	CBS collection (Nguyen H.V.)	Peter	0.000170942	CBS1194	AA	hom	FALSE
CBS1196	AQS	Arak Distillery	Distillery	Distillery	Indonesia	no	B	2	aneu;+1*1;	1only	heterozygous	215	26. Asian fermentation	CBS collection (Nguyen H.V.)	Peter	0.000417209	CBS1196	BB	hom	TRUE
CBS1227	AHR	Abscess on epididymis	Human, clinical	Human, clinical	Romania	yes	A	1	euploid	Euploid	homozygous	268	1. Wine/European	CBS collection (Nguyen H.V.)	Peter	0.000162739	CBS1227	AA	hom	FALSE
CBS1230	AQT	Beer	Beer	Beer	Belgium	no	A	3	aneu;+1*6;	Gain	heterozygous	232	11. Ale beer	CBS collection	Peter	0.00277673	CBS1230	AA	hom	FALSE
CBS1236-a	AAL	Bakery	Bakery	Bakery	France	no	B	2	aneu;-1*6;	Loss	heterozygous	188	8. Mixed origin	CBS collection (Nguyen H.V.)	Peter	0.00321968	CBS1236_a	BB	hom	FALSE
CBS1239	ARA	Distillery	Distillery	Distillery	NA	no	B	4	aneu;+1*1;+1*8;+1*15;	Gain	heterozygous	226	M. Mosaic	CBS collection (Nguyen H.V.)	Peter	0.00318097	CBS1239	BB	het	FALSE
CBS1248	AEC	Brewers yeast	Beer	Beer	NA	no	B	Xn	NA	Euploid	heterozygous	111	11. Ale beer	CBS collection (Nguyen H.V.)	Peter	0.00356462	CBS1248	AB	het	FALSE
CBS1250	APV	Cherry wine	Wine	Wine	Spain	no	A	2	euploid	Euploid	homozygous	226	1. Wine/European	CBS collection (Nguyen H.V.)	Peter	0.000147656	CBS1250	AA	hom	FALSE
CBS1252	AFF	Bakery	Bakery	Bakery	France	yes	B	1	euploid	Euploid	homozygous	213	8. Mixed origin	CBS collection (Nguyen H.V.)	Peter	0.000219207	CBS1252	BB	hom	FALSE
CBS1254	ARB	Bakery	Bakery	Bakery	NA	no	B	4	aneu;+1*8;-1*10;	Both	heterozygous	241	M. Mosaic	CBS collection (Nguyen H.V.)	Peter	0.00321144	CBS1254	BB	het	FALSE
CBS1257	ARC	Wine	Wine	Wine	Germany	no	A	2	aneu;+1*14;	Gain	heterozygous	220	1. Wine/European	CBS collection (Nguyen H.V.)	Peter	0.000402349	CBS1257	AA	hom	FALSE
CBS1385	AGE	Bakery	Bakery	Bakery	NA	no	B	2	aneu;-1*6;	Loss	heterozygous	211	8. Mixed origin	CBS collection (Nguyen H.V.)	Peter	0.00291973	CBS1385	AB	het	FALSE
CBS1387	AFG	Bakery	Bakery	Bakery	NA	yes	B	1	euploid	Euploid	homozygous	678	M. Mosaic	CBS collection (Nguyen H.V.)	Peter	0.000314142	CBS1387	BB	hom	FALSE
CBS1388a	AAH	Unknown	Unknown	Unknown	NA	yes	A	1	euploid	Euploid	homozygous	264	NA	CBS collection (Nguyen H.V.)	Peter	0.000324229	CBS1388a	AA	hom	FALSE
CBS1394	AEL	Distillery	Distillery	Distillery	NA	no	B	2	euploid	Euploid	heterozygous	213	M. Mosaic	CBS collection (Nguyen H.V.)	Peter	0.00312194	CBS1394	BB	het	FALSE
CBS1398	ARE	Leaf of Eucalyptus sp.	Tree	Tree	NA	no	A	2	aneu;+1*2;+1*3;+1*6;+4*9;+1*12;+1*14;+1*15;	Gain	heterozygous	244	7. Mosaic beer	CBS collection (Nguyen H.V.)	Peter	0.00157898	CBS1398	AA	het	FALSE
CBS1419	AHS	Wine	Wine	Wine	Ghana	yes	B	1	aneu;+1*9;	Gain	homozygous	290	13. African palm wine	CBS collection (Nguyen H.V.)	Peter	0.000276228	CBS1419	BB	hom	FALSE
CBS1428	AEI	Bakery	Bakery	Bakery	NA	yes	B	1	euploid	Euploid	homozygous	240	M. Mosaic	CBS collection (Nguyen H.V.)	Peter	0.000331094	CBS1428	BB	hom	FALSE
CBS1460	AHT	Fermenting fruit	Fermentation	Fermentation	Indonesia	yes	A	1	euploid	Euploid	homozygous	244	1. Wine/European	CBS collection (Nguyen H.V.)	Peter	0.000159976	CBS1460	AA	hom	FALSE
CBS1463	AIG	Beer	Beer	Beer	NA	yes	A	1	euploid	Euploid	homozygous	172	7. Mosaic beer	CBS collection (Nguyen H.V.)	Peter	0.0002465	CBS1463	AA	hom	FALSE
CBS1464	AFT	Infected nail of 4 yo girl	Human, clinical	Human, clinical	Austria	no	B	4	euploid	Euploid	homozygous	221	8. Mixed origin	CBS collection (Nguyen H.V.)	Peter	0.000283138	CBS1464	BB	hom	FALSE
CBS1479	AGF	Wine	Wine	Wine	NA	yes	A	1	euploid	Euploid	homozygous	475	1. Wine/European	CBS collection (Nguyen H.V.)	Peter	0.00014515	CBS1479	AA	hom	FALSE
CBS1480	AGG	Distillery	Distillery	Distillery	NA	no	B	2	euploid	Euploid	heterozygous	217	26. Asian fermentation	CBS collection (Nguyen H.V.)	Peter	0.000603574	CBS1480	BB	hom	FALSE
CBS1487	AHV	Brewery	Beer	Beer	NA	yes	A	1	aneu;+1*1;+1*11;	Gain	heterozygous	192	8. Mixed origin	CBS collection (Nguyen H.V.)	Peter	0.000451119	CBS1487	AA	hom	FALSE
CBS1489	ASG	Tubercular lung	Human, clinical	Human, clinical	Italy	no	A	2	aneu;+2*2;+1*3;+1*8;+1*10;	Gain	homozygous	275	1. Wine/European	CBS collection (Nguyen H.V.)	Peter	0.000224211	CBS1489	AA	hom	FALSE
CBS1508	AEP	Starter for sorghum brandy	Distillery	Distillery	NA	no	B	2	euploid	Euploid	homozygous	327	26. Asian fermentation	CBS collection (Nguyen H.V.)	Peter	0.000247729	CBS1508	BB	hom	FALSE
CBS1509	AFH	Distillery	Distillery	Distillery	NA	yes	B	1	euploid	Euploid	homozygous	484	26. Asian fermentation	CBS collection (Nguyen H.V.)	Peter	0.000212274	CBS1509	BB	hom	FALSE
CBS1540	AHF	Tibi grains	Nature	Nature	Switzerland	yes	A	1	euploid	Euploid	homozygous	235	M. Mosaic	CBS collection (Nguyen H.V.)	Peter	0.000282949	CBS1540	AA	hom	FALSE
CBS1544	AGP	Juice	Fruit	Fruit	Netherlands	yes	A	1	aneu;+1*1;+1*9;	Gain	heterozygous	287	M. Mosaic	CBS collection (Nguyen H.V.)	Peter	0.000538702	CBS1544	AA	hom	FALSE
CBS1576	ARG	Exudate of Arenga sp.	Tree	Tree	Celebes, Sulavesi, Indonesia	no	B	2	euploid	Euploid	homozygous	222	24. Asian islands	CBS collection (Nguyen H.V.)	Peter	0.000306773	CBS1576	BB	hom	FALSE
CBS1582	AGH	Wine	Wine	Wine	Portugal	yes	A	1	euploid	Euploid	homozygous	225	1. Wine/European	CBS collection (Nguyen H.V.)	Peter	0.000161861	CBS1582	AA	hom	FALSE
CBS1586	AHG	Pear must	Fruit	Fruit	NA	yes	A	1	euploid	Euploid	homozygous	228	1. Wine/European	CBS collection (Nguyen H.V.)	Peter	0.000145951	CBS1586	AA	hom	FALSE
CBS1590	AGI	Grape must / juice	Wine	Must	Italy	no	A	2	euploid	Euploid	homozygous	328	1. Wine/European	CBS collection (Nguyen H.V.)	Peter	0.000150202	CBS1590	AA	hom	FALSE
CBS1592	ARH	Fermenting cacao	Fermentation	Fermentation	Java, Indonesia	no	B	2	aneu;+1*1;	1only	heterozygous	211	24. Asian islands	CBS collection (Nguyen H.V.)	Peter	0.000818941	CBS1592	BB	hom	TRUE
CBS1593	ARI	Fermenting cacao	Fermentation	Fermentation	Java, Indonesia	no	B	2	aneu;+2*1;+1*2;	Gain	heterozygous	210	24. Asian islands	CBS collection (Nguyen H.V.)	Peter	0.00112727	CBS1593	BB	het	FALSE
CBS1594	AGR	Plant	Nature	Nature	NA	yes	B	1	euploid	Euploid	homozygous	189	24. Asian islands	CBS collection (Nguyen H.V.)	Peter	0.000297814	CBS1594	BB	hom	FALSE
CBS1602	ARK	Must of Blanchard pears	Fruit	Fruit	NA	no	A	2	aneu;+1*8;+1*13;	Gain	heterozygous	270	1. Wine/European	CBS collection (Nguyen H.V.)	Peter	0.000336481	CBS1602	AA	hom	FALSE
CBS1782	AEQ	Super-attenuated beer	Beer	Beer	Japan	yes	B	1	euploid	Euploid	homozygous	227	7. Mosaic beer	CBS collection (Nguyen H.V.)	Peter	0.000284541	CBS1782	BB	hom	FALSE
CBS2087	ARL	Lychee flower	Flower	Flower	China	no	A	2	aneu;+1*1;	1only	heterozygous	233	1. Wine/European	CBS collection (Nguyen H.V.)	Peter	0.000478158	CBS2087	AA	hom	TRUE
CBS2165a	AAC	Brewers	Beer	Beer	England	no	B	2	euploid	Euploid	heterozygous	271	11. Ale beer	CBS collection (Nguyen H.V.)	Peter	0.00240131	CBS2165a	AB	het	FALSE
CBS2180	AIA	Turbid Italian wine	Wine	Wine	Italy	yes	A	1	euploid	Euploid	homozygous	175	1. Wine/European	CBS collection (Nguyen H.V.)	Peter	0.000131734	CBS2180	AA	hom	FALSE
CBS2183	AFI	Wine	Wine	Wine	Chateau Chalon France	yes	A	1	euploid	Euploid	homozygous	407	1. Wine/European	CBS collection (Nguyen H.V.)	Peter	0.000146358	CBS2183	AA	hom	FALSE
CBS2188	ARM	Fruit of Eryobotrya japonica	Fruit	Fruit	Japan	no	B	2	euploid	Euploid	heterozygous	231	25. Sake	CBS collection (Nguyen H.V.)	Peter	0.000613852	CBS2188	BB	hom	FALSE
CBS2246	ARN	Sputum	Human, clinical	Human, clinical	Netherlands	no	B	3	euploid	Euploid	heterozygous	202	5. French dairy	CBS collection (Nguyen H.V.)	Peter	0.00357249	CBS2246	BB	hom	FALSE
CBS2247	AHK	Grape must	Wine	Must	South Africa	yes	A	1	euploid	Euploid	homozygous	211	1. Wine/European	CBS collection (Nguyen H.V.)	Peter	0.000159486	CBS2247	AA	hom	FALSE
CBS2270	ARP	Japanese wine	Wine	Wine	Japan	no	B	2	aneu;+1*4;+1*11;+1*15;	Gain	heterozygous	256	25. Sake	CBS collection (Nguyen H.V.)	Peter	0.00043866	CBS2270	BB	hom	FALSE
CBS2271	ARQ	Wine	Wine	Wine	Belgium	no	A	2	euploid	Euploid	homozygous	196	1. Wine/European	CBS collection (Nguyen H.V.)	Peter	0.000156607	CBS2271	AA	hom	FALSE
CBS2272	ARR	Butter milk	Dairy	Dairy	Delft, Netherlands	no	A	2	aneu;+1*1;+1*3;	Gain	heterozygous	199	5. French dairy	CBS collection (Nguyen H.V.)	Peter	0.000453518	CBS2272	AA	hom	FALSE
CBS2361	AGK	Trinidadian cane sugar	Nature	Nature	UK	yes	B	1	euploid	Euploid	homozygous	405	8. Mixed origin	CBS collection (Nguyen H.V.)	Peter	0.00025096	CBS2361	BB	hom	FALSE
CBS2421	ARS	Japanese kefyr grains	Nature	Nature	NA	no	A	2	aneu;+1*1;	1only	heterozygous	115	5. French dairy	CBS collection (Nguyen H.V.)	Peter	0.00236533	CBS2421	AA	het	TRUE
CBS2441	AEE	Distillery	Distillery	Distillery	NA	no	B	3	aneu;+2*1;+1*5;+1*8;+1*9;	Gain	heterozygous	223	M. Mosaic	CBS collection (Nguyen H.V.)	Peter	0.00334207	CBS2441	BB	hom	FALSE
CBS2444	AGC	Distillery	Distillery	Distillery	Seagrams distillery, Louisville, Kentucky	yes	A	1	aneu;+1*1;+1*5;+1*10;+1*11;	Gain	heterozygous	85	NA	CBS collection (Nguyen H.V.)	Peter	0.00074621	CBS2444	AA	hom	FALSE
CBS2805	AIB	Wine	Wine	Wine	Slovakia	yes	A	1	euploid	Euploid	homozygous	233	1. Wine/European	CBS collection (Nguyen H.V.)	Peter	0.000150359	CBS2805	AA	hom	FALSE
CBS2806a	AAE	Wine	Wine	Wine	Slovakia	yes	A	1	euploid	Euploid	homozygous	228	1. Wine/European	CBS collection (Nguyen H.V.)	Peter	0.000142055	CBS2806a	AA	hom	FALSE
CBS2807	AIC	Wine	Wine	Wine	Slovakia	yes	A	1	euploid	Euploid	homozygous	202	1. Wine/European	CBS collection (Nguyen H.V.)	Peter	0.00015114	CBS2807	AA	hom	FALSE
CBS2808	ART	Wine	Wine	Wine	Slovakia	no	A	2	euploid	Euploid	heterozygous	191	1. Wine/European	CBS collection (Nguyen H.V.)	Peter	0.000483747	CBS2808	AA	hom	FALSE
CBS2814	AFV	Wine	Wine	Wine	Slovakia	no	A	2	aneu;-1*5;	Loss	homozygous	224	1. Wine/European	CBS collection (Nguyen H.V.)	Peter	0.000148513	CBS2814	AA	hom	FALSE
CBS2888_1b	ABL	Soil	Soil	Soil	South Africa	yes	B	1	euploid	Euploid	homozygous	295	NA	CBS collection (Nguyen H.V.)	1	0.000266321	CBS2888_1b	BB	hom	FALSE
CBS2909	AID	Human feces	Human	Human	NA	no	A	2	euploid	Euploid	heterozygous	200	2. Alpechin	CBS collection (Nguyen H.V.)	Peter	0.000735574	CBS2909	AA	het	FALSE
CBS2910	AIE	Human feces	Human	Human	Portugal	yes	A	1	aneu;+1*9;	Gain	homozygous	203	2. Alpechin	CBS collection (Nguyen H.V.)	Peter	0.000239904	CBS2910	AA	hom	FALSE
CBS2965	ARV	Distillery	Distillery	Distillery	Denmark	no	A	2	aneu;+1*1;	1only	homozygous	253	1. Wine/European	CBS collection (Nguyen H.V.)	Peter	0.000179164	CBS2965	AA	hom	TRUE
CBS2966a	AAI	Distillery	Distillery	Distillery	Denmark	yes	A	1	euploid	Euploid	homozygous	243	1. Wine/European	CBS collection (Nguyen H.V.)	Peter	0.000175301	CBS2966a	AA	hom	FALSE
CBS2970	AER	Blackstrap molasses	Industrial	Industrial	San Jose sugar mill, Rio Piedras, Puerto Rico	yes	B	1	aneu;+1*2;+1*4;+1*8;+1*9;	Gain	heterozygous	218	M. Mosaic	CBS collection (Nguyen H.V.)	Peter	0.000750391	CBS2970	AB	het	FALSE
CBS2973	AEM	Beer wort	Beer	Beer	NA	yes	A	1	aneu;+1*11;	Gain	heterozygous	201	8. Mixed origin	CBS collection (Nguyen H.V.)	Peter	0.00051498	CBS2973	AA	hom	FALSE
CBS2992	AFK	Palm wine	Palm wine	Palm wine	Pakistan	no	B	2	euploid	Euploid	homozygous	187	24. Asian islands	CBS collection (Nguyen H.V.)	Peter	0.000263768	CBS2992	BB	hom	FALSE
CBS3000	AHH	Palm wine	Palm wine	Palm wine	Denmark	yes	B	1	euploid	Euploid	homozygous	203	24. Asian islands	CBS collection (Nguyen H.V.)	Peter	0.00028287	CBS3000	BB	hom	FALSE
CBS3012	AGA	Wine	Wine	Wine	Cadiz, Spain	no	A	2	aneu;+2*1;+2*8;	Gain	homozygous	233	1. Wine/European	CBS collection (Nguyen H.V.)	Peter	0.000158957	CBS3012	AA	hom	FALSE
CBS3013	AGS	Wine	Wine	Wine	Cadiz, Spain	yes	A	1	euploid	Euploid	homozygous	220	1. Wine/European	CBS collection (Nguyen H.V.)	Peter	0.000154958	CBS3013	AA	hom	FALSE
CBS3078	AGT	Spores	Unknown	Unknown	NA	yes	B	1	euploid	Euploid	homozygous	215	M. Mosaic	CBS collection (Nguyen H.V.)	Peter	0.000350333	CBS3078	BB	hom	FALSE
CBS3081	AHL	Alpechin (waste from olive oil production)	Industrial	Industrial	Spain	yes	A	1	euploid	Euploid	homozygous	236	2. Alpechin	CBS collection (Nguyen H.V.)	Peter	0.000311767	CBS3081	AA	hom	FALSE
CBS3093	AHM	Alpechin (waste from olive oil production)	Industrial	Industrial	Spain	yes	A	1	euploid	Euploid	homozygous	206	2. Alpechin	CBS collection (Nguyen H.V.)	Peter	0.000259567	CBS3093	AA	hom	FALSE
CBS3093_1b	ABM	Alpechin (waste from olive oil production)	Industrial	Industrial	Spain	yes	A	1	euploid	Euploid	homozygous	198	2. Alpechin	CBS collection (Nguyen H.V.)	1	0.000266587	CBS3093_1b	AA	hom	FALSE
CBS382	APP	Beer	Beer	Beer	Brazil, Rio de Janeiro	no	A	3	aneu;+1*9;+1*10;+1*12;	Gain	heterozygous	230	7. Mosaic beer	CBS collection (Nguyen H.V.)	Peter	0.00207579	CBS382	AA	het	FALSE
CBS400	APQ	Palm wine, from Elaeis guineensis	Palm wine	Palm wine	Ivory Coast	no	B	2	euploid	Euploid	homozygous	245	13. African palm wine	CBS collection (Nguyen H.V.)	Peter	0.000261881	CBS400	BB	hom	FALSE
CBS403	APR	Ginger beer, from Zingiber officinale	Beer	Beer	West Africa	no	B	2	aneu;+1*9;	Gain	homozygous	265	13. African palm wine	CBS collection (Nguyen H.V.)	Peter	0.000270561	CBS403	BB	hom	FALSE
CBS4054	AES	Red wine	Wine	Wine	Spain	yes	A	1	aneu;+1*2;	Gain	homozygous	184	1. Wine/European	CBS collection (Nguyen H.V.)	Peter	0.00015284	CBS4054	AA	hom	FALSE
CBS4079	AEK	Film on white wine	Wine	Wine	Spain	yes	A	1	euploid	Euploid	homozygous	303	1. Wine/European	CBS collection (Nguyen H.V.)	Peter	0.000171839	CBS4079	AA	hom	FALSE
CBS4092	ASA	Film on white wine	Wine	Wine	Spain	no	A	3	aneu;+1*9;	Gain	heterozygous	172	1. Wine/European	CBS collection (Nguyen H.V.)	Peter	0.000564815	CBS4092	AA	hom	FALSE
CBS4093a	AAK	Film on white wine	Wine	Wine	Spain	yes	A	1	euploid	Euploid	homozygous	267	1. Wine/European	CBS collection (Nguyen H.V.)	Peter	0.00015998	CBS4093a	AA	hom	FALSE
CBS420	AQM	Stracchino cheese	Dairy	Dairy	Italy	no	A	2	aneu;+1*9;+1*16;	Gain	heterozygous	145	5. French dairy	CBS collection (Nguyen H.V.)	Peter	0.00140261	CBS420	AA	hom	FALSE
CBS422a	AAB	Beer	Beer	Beer	Odessa, Ukraine	yes	A	1	euploid	Euploid	homozygous	206	7. Mosaic beer	CBS collection (Nguyen H.V.)	Peter	0.000241592	CBS422a	AA	hom	FALSE
CBS423	APS	Wine	Wine	Wine	Switzerland	no	A	2	aneu;+1*1;+1*8;+1*14;	Gain	heterozygous	219	1. Wine/European	CBS collection (Nguyen H.V.)	Peter	0.000467913	CBS423	AA	hom	FALSE
CBS4255	ASB	Sputum	Human, clinical	Human, clinical	NA	no	B	2	euploid	Euploid	heterozygous	247	7. Mosaic beer	CBS collection (Nguyen H.V.)	Peter	0.00286265	CBS4255	AB	het	FALSE
CBS428a	AAG	Unknown	Unknown	Unknown	NA	yes	B	1	euploid	Euploid	homozygous	213	M. Mosaic	CBS collection (Nguyen H.V.)	Peter	0.000302032	CBS428a	BB	hom	FALSE
CBS435	AQN	Moto (sake yeast starter)	Sake	Sake	Japan	no	B	2	euploid	Euploid	heterozygous	221	25. Sake	CBS collection (Nguyen H.V.)	Peter	0.000414388	CBS435	BB	hom	FALSE
CBS436a	AAD	Moto (sake yeast starter)	Sake	Sake	Japan	no	B	2	aneu;+2*8;	Gain	homozygous	205	25. Sake	CBS collection (Nguyen H.V.)	Peter	0.000245971	CBS436a	BB	hom	FALSE
CBS439	AGN	Silvaner grapes	Wine	Fruit	Germany	yes	A	1	euploid	Euploid	homozygous	190	M. Mosaic	CBS collection (Nguyen H.V.)	Peter	0.000189242	CBS439	AA	hom	FALSE
CBS440	AHQ	Molasses	Industrial	Industrial	Taiwan	yes	B	1	euploid	Euploid	homozygous	239	26. Asian fermentation	CBS collection (Nguyen H.V.)	Peter	0.000280299	CBS440	BB	hom	FALSE
CBS4454	AEN	Kaffir beer	Beer	Beer	South Africa	no	A	2	aneu;+1*1;+1*3;+1*4;	Gain	heterozygous	207	6. African beer	CBS collection (Nguyen H.V.)	Peter	0.00161645	CBS4454	AA	hom	FALSE
CBS4455	ASC	Kaffir beer	Beer	Beer	South Africa	no	A	3	aneu;+1*1;	1only	heterozygous	240	6. African beer	CBS collection (Nguyen H.V.)	Peter	0.0030047	CBS4455	AA	hom	TRUE
CBS4456	AFL	Kaffir beer	Beer	Beer	South Africa	yes	A	1	aneu;+1*8;	Gain	homozygous	192	6. African beer	CBS collection (Nguyen H.V.)	Peter	0.000345926	CBS4456	AA	hom	FALSE
CBS4458	AGL	Red wine	Wine	Wine	France	yes	A	1	euploid	Euploid	homozygous	921	1. Wine/European	CBS collection (Nguyen H.V.)	Peter	0.000184982	CBS4458	AA	hom	FALSE
CBS4507	ASD	Brewer's yeast, English top yeast	Beer	Beer	NA	no	A	2	euploid	Euploid	heterozygous	239	1. Wine/European	CBS collection (Nguyen H.V.)	Peter	0.00030732	CBS4507	AA	hom	FALSE
CBS457	AIF	Grape must	Wine	Must	Italy	no	A	2	euploid	Euploid	heterozygous	224	1. Wine/European	CBS collection (Nguyen H.V.)	Peter	0.000538991	CBS457	AA	hom	FALSE
CBS459	APT	Grape must	Wine	Must	Italy	no	A	2	aneu;+1*14;	Gain	homozygous	295	1. Wine/European	CBS collection (Nguyen H.V.)	Peter	0.000146437	CBS459	AA	hom	FALSE
CBS462	AQP	Grape must	Wine	Must	Spain	no	A	2	aneu;+1*1;+1*9;	Gain	heterozygous	219	1. Wine/European	CBS collection (Nguyen H.V.)	Peter	0.000326508	CBS462	AA	hom	FALSE
CBS4667	ASE	Grapes	Wine	Fruit	Former Czechoslovakia	no	A	2	euploid	Euploid	heterozygous	226	1. Wine/European	CBS collection (Nguyen H.V.)	Peter	0.00030996	CBS4667	AA	hom	FALSE
CBS4734	AHB	Sugar cane juice	Nature	Nature	NA	yes	A	1	euploid	Euploid	homozygous	213	NA	CBS collection (Nguyen H.V.)	Peter	0.000243056	CBS4734	AA	hom	FALSE
CBS4903	AQA	Alpechin (waste from olive oil production)	Industrial	Industrial	Spain	no	A	2	euploid	Euploid	heterozygous	229	2. Alpechin	CBS collection (Nguyen H.V.)	Peter	0.00115004	CBS4903	AA	hom	FALSE
CBS5112	AQB	Grape must	Wine	Must	Spain	no	A	2	euploid	Euploid	homozygous	265	1. Wine/European	CBS collection (Nguyen H.V.)	Peter	0.000169023	CBS5112	AA	hom	FALSE
CBS5155	AQC	Fermenting Grape must	Wine	Must	South Armenia	no	A	2	euploid	Euploid	heterozygous	181	1. Wine/European	CBS collection (Nguyen H.V.)	Peter	0.000311885	CBS5155	AA	hom	FALSE
CBS5378	AQD	Alpechin (waste from olive oil production)	Industrial	Industrial	Spain	no	A	2	aneu;+1*8;	Gain	heterozygous	231	2. Alpechin	CBS collection (Nguyen H.V.)	Peter	0.00112635	CBS5378	AA	hom	FALSE
CBS5635	AHN	Grape must	Wine	Must	South Africa	yes	A	1	euploid	Euploid	homozygous	209	1. Wine/European	CBS collection (Nguyen H.V.)	Peter	0.000195292	CBS5635	AA	hom	FALSE
CBS5835	AHP	Wine	Wine	Wine	Spain	no	A	2	euploid	Euploid	heterozygous	265	1. Wine/European	CBS collection (Nguyen H.V.)	Peter	0.000400767	CBS5835	AA	hom	FALSE
CBS6006	AQE	Wine	Wine	Wine	Spain	no	A	2	euploid	Euploid	heterozygous	218	1. Wine/European	CBS collection (Nguyen H.V.)	Peter	0.000354552	CBS6006	AA	het	FALSE
CBS6007	AET	Wine	Wine	Wine	Spain	yes	A	1	euploid	Euploid	homozygous	185	1. Wine/European	CBS collection (Nguyen H.V.)	Peter	0.000153051	CBS6007	AA	hom	FALSE
CBS6216	AEV	Tapwater	Water	Water	Rotterdam, Netherlands	no	B	2	aneu;+1*7;	Gain	heterozygous	228	8. Mixed origin	CBS collection	Peter	0.0029738	CBS6216	BB	hom	FALSE
CBS6223	AGV	Grape juice	Wine	Must	Chile	yes	A	1	euploid	Euploid	homozygous	209	1. Wine/European	CBS collection (Nguyen H.V.)	Peter	0.000162243	CBS6223	AA	hom	FALSE
CBS6308	AGB	Brewer yeast, Yorkshire type	Beer	Beer	South Yorkshire, UK	no	junk	2	euploid	Euploid	heterozygous	60	11. Ale beer	CBS collection (Nguyen H.V.)	Peter	0.00264576	CBS6308	AB	het	FALSE
CBS6333	AHA	Rotting banana (from Musa sapientum)	Fruit	Fruit	Costa Rica	yes	A	1	euploid	Euploid	homozygous	194	M. Mosaic	CBS collection (Nguyen H.V.)	Peter	0.000296632	CBS6333	AA	hom	FALSE
CBS6412	AFM	Sake yeast	Sake	Sake	Japan	yes	B	1	euploid	Euploid	homozygous	693	25. Sake	CBS collection (Nguyen H.V.)	Peter	0.000283911	CBS6412	BB	hom	FALSE
CBS6413	AFN	Sake yeast	Sake	Sake	Japan	yes	B	1	euploid	Euploid	homozygous	251	25. Sake	CBS collection (Nguyen H.V.)	Peter	0.000245448	CBS6413	BB	hom	FALSE
CBS6414	AEF	Sake yeast	Sake	Sake	Japan	yes	B	1	euploid	Euploid	homozygous	252	25. Sake	CBS collection (Nguyen H.V.)	Peter	0.000264979	CBS6414	BB	hom	FALSE
CBS6503	AFA	Brewery	Beer	Beer	UK	no	B	2	aneu;-1*16;	Loss	homozygous	203	7. Mosaic beer	CBS collection (Nguyen H.V.)	Peter	0.000272829	CBS6503	BB	hom	FALSE
CBS6505	AFP	Brewery (Killer strain responsible for death of brewing yeast)	Beer	Beer	UK	no	B	2	euploid	Euploid	heterozygous	243	7. Mosaic beer	CBS collection (Nguyen H.V.)	Peter	0.00030412	CBS6505	BB	hom	FALSE
CBS6914	AHI	White wine	Wine	Wine	Spain	yes	A	1	aneu;+1*14;	Gain	homozygous	244	1. Wine/European	CBS collection (Nguyen H.V.)	Peter	0.000158055	CBS6914	AA	hom	FALSE
CBS7371	AFB	Brewery	Beer	Beer	UK	yes	B	1	euploid	Euploid	homozygous	224	7. Mosaic beer	CBS collection (Nguyen H.V.)	Peter	0.00030374	CBS7371	BB	hom	FALSE
CBS7539	AQG	Turbid beer	Beer	Beer	Plovdiv, Bulgaria	no	A	2	euploid	Euploid	heterozygous	221	7. Mosaic beer	CBS collection (Nguyen H.V.)	Peter	0.00152745	CBS7539	AA	hom	FALSE
CBS7764	AFC	Salmo gairdneri (rainbow trout)	Nature	Nature	Goteborg, Sweden	no	B	2	aneu;+1*7;-1*14;	Both	heterozygous	294	8. Mixed origin	CBS collection (Nguyen H.V.)	Peter	0.00293629	CBS7764	AB	het	FALSE
CBS7765	ADT	Salmo gairdneri (rainbow trout)	Nature	Nature	Sweden, Goteborg	yes	A	1	euploid	Euploid	homozygous	267	M. Mosaic	CBS collection (Nguyen H.V.)	Peter	7.15e-06	CBS7765	AA	hom	FALSE
CBS7903	ADV	Palm wine	Palm wine	Palm wine	Nigeria	yes	B	1	euploid	Euploid	homozygous	219	13. African palm wine	CBS collection (Nguyen H.V.)	Peter	0.000276703	CBS7903	BB	hom	FALSE
CBS7957	AQH	Factory producing cassava flour	Industrial	Industrial	Sao Paulo, Brazil	no	A	3	aneu;+1*3;	Gain	heterozygous	220	7. Mosaic beer	CBS collection (Nguyen H.V.)	Peter	0.00418096	CBS7957	AA	het	FALSE
CBS7958	AEA	Factory producing cassava flour	Industrial	Industrial	Sao Paulo, Brazil	yes	A	1	euploid	Euploid	homozygous	209	7. Mosaic beer	CBS collection (Nguyen H.V.)	Peter	0.000248512	CBS7958	AA	hom	FALSE
CBS7959	AFR	Factory producing ethanol (sugar cane syrup)	Industrial	Industrial	Sao Paulo, Brazil	yes	A	1	aneu;+1*1;	1only	homozygous	251	3. Brazilian bioethanol	CBS collection (Nguyen H.V.)	Peter	0.000311388	CBS7959	AA	hom	TRUE
CBS7960	AFD	Factory producing ethanol (sugar cane syrup)	Industrial	Industrial	Sao Paulo, Brazil	yes	A	1	euploid	Euploid	homozygous	185	3. Brazilian bioethanol	CBS collection (Nguyen H.V.)	Peter	0.000270435	CBS7960	AA	het	FALSE
CBS7961	AGM	Fermenting concentrated syrup (sugar cane)	Industrial	Industrial	Sao Paulo, Brazil	yes	A	1	euploid	Euploid	homozygous	434	3. Brazilian bioethanol	CBS collection (Nguyen H.V.)	Peter	0.000343211	CBS7961	AA	hom	FALSE
CBS7962	AEG	Fermenting concentrated syrup (sugar cane)	Industrial	Industrial	Brazil	yes	A	1	euploid	Euploid	homozygous	255	3. Brazilian bioethanol	CBS collection (Nguyen H.V.)	Peter	0.000340326	CBS7962	AA	hom	FALSE
CBS7963	AHC	Fermenting concentrated syrup (sugar cane)	Industrial	Industrial	Sao Paulo, Brazil	yes	A	1	euploid	Euploid	homozygous	186	3. Brazilian bioethanol	CBS collection (Nguyen H.V.)	Peter	0.000227933	CBS7963	AA	hom	FALSE
CBS7964	AEH	Fermenting concentrated syrup (sugar cane)	Industrial	Industrial	Brazil	yes	A	1	euploid	Euploid	homozygous	270	3. Brazilian bioethanol	CBS collection (Nguyen H.V.)	Peter	0.000251339	CBS7964	AA	hom	FALSE
CBS7993	AFQ	Fresh water	Water	Water	Rio de Janeiro, Tijuca National Forest, Cushvara River, Brazil	yes	A	1	euploid	Euploid	homozygous	243	M. Mosaic	CBS collection (Nguyen H.V.)	Peter	0.000300401	CBS7993	AA	hom	FALSE
CBS8291	AFE	Seawater	Water	Water	Sweden	no	A	2	euploid	Euploid	heterozygous	188	8. Mixed origin	CBS collection (Nguyen H.V.)	Peter	0.00246087	CBS8291	AA	hom	FALSE
CBS8292	AQI	Seawater	Water	Water	Sweden	no	A	2	euploid	Euploid	heterozygous	202	8. Mixed origin	CBS collection (Nguyen H.V.)	Peter	0.00339089	CBS8292	AA	het	FALSE
CCY_21-4-102	BBF	River water (Danube)	Water	Water	Bratislava, Slovakia	no	A	2	euploid	Euploid	heterozygous	227	8. Mixed origin	Culture collection of Yeast (Renata Vadkertiova)	Peter	0.00321871	CCY_21_4_102	AA	hom	FALSE
CCY_21-4-106	BBG	River water (Morava)	Water	Water	Devinska Nova Ves, Slovakia	no	A	4	aneu;-1*1;-1*6;-1*8;-1*10;-1*14;-1*16;	Loss	heterozygous	230	11. Ale beer	Culture collection of Yeast (Renata Vadkertiova)	Peter	0.00299828	CCY_21_4_106	AA	het	FALSE
CCY_21-4-119	BBH	Blossoms of pear tree (Pyrus communis)	Flower	Flower	Male Levare, Slovakia	no	A	2	euploid	Euploid	homozygous	250	1. Wine/European	Culture collection of Yeast (Renata Vadkertiova)	Peter	0.000190345	CCY_21_4_119	AA	hom	FALSE
CCY_21-4-120	BBI	Blossoms of plum tree (Prunus domestica L., 'Stanley')	Flower	Flower	Male Levare, Slovakia	no	A	2	euploid	Euploid	homozygous	279	1. Wine/European	Culture collection of Yeast (Renata Vadkertiova)	Peter	0.00019984	CCY_21_4_120	AA	hom	FALSE
CCY_21-4-121	BBK	Blossoms of apricot tree (Prunus armeniaca L., Madraska)	Flower	Flower	Male Zaluzie, Slovakia	no	A	2	euploid	Euploid	homozygous	268	1. Wine/European	Culture collection of Yeast (Renata Vadkertiova)	Peter	0.000189614	CCY_21_4_121	AA	hom	FALSE
CCY_21-4-88	BBC	Fruitbody of mushroom Xerocomus badius (Fr.) Gilb.	Fruit	Fruit	Laksarska Nova Ves, Slovakia	no	B	3	aneu;+1*7;	Gain	heterozygous	320	8. Mixed origin	Culture collection of Yeast (Renata Vadkertiova)	Peter	0.00518305	CCY_21_4_88	AB	het	FALSE
CCY_21-4-89:7-3	CEM	Fermenting acorn meal	Fermentation	Fermentation	North Korea	yes	B	1	euploid	Euploid	homozygous	203	M. Mosaic	State Research Institute of Genetics and Selection of Industrial Microorganisms (Naumov G.I.)	Peter	0.000287956	CCY_21_4_89_7_3	BB	hom	FALSE
CCY_21-4-93:6B	CDK	Leaves of Sequoia sp.	Tree	Tree	North Korea	yes	B	1	euploid	Euploid	homozygous	165	M. Mosaic	State Research Institute of Genetics and Selection of Industrial Microorganisms (Naumov G.I.)	Peter	0.000248385	CCY_21_4_93_6B	BB	hom	FALSE
CCY_21-4-97	BBD	Fish pond water	Water	Water	Jakubov, Slovakia	no	A	2	aneu;+1*8;	Gain	heterozygous	310	8. Mixed origin	Culture collection of Yeast (Renata Vadkertiova)	Peter	0.00336679	CCY_21_4_97	AA	hom	FALSE
CCY_21-4-98	BBE	Sediment of fresh water lake	Water	Water	Jakubov, Slovakia	no	A	2	aneu;+1*8;	Gain	heterozygous	302	8. Mixed origin	Culture collection of Yeast (Renata Vadkertiova)	Peter	0.00302827	CCY_21_4_98	AA	het	FALSE
CD7-9Sv2	CQV	Wine	Wine	Wine	Italy	no	A	2	euploid	Euploid	homozygous	204	1. Wine/European	University of Basilicata (Angela Capece and Patrizia Romano)	Peter	0.000219381	CD7_9Sv2	AA	hom	FALSE
CECT10109_1b	ABP	Prickly pear	Fruit	Fruit	Spain	yes	A	1	euploid	Euploid	homozygous	215	1. Wine/European	CECT collection	1	0.000197697	CECT10109_1b	AA	hom	FALSE
CECT10120	ATR	Fruit	Fruit	Fruit	Spain	no	B	2	euploid	Euploid	heterozygous	199	8. Mixed origin	CECT collection	Peter	0.00289326	CECT10120	AB	het	FALSE
CECT10131	ATS	Flower	Flower	Flower	Spain	no	A	2	euploid	Euploid	heterozygous	248	8. Mixed origin	CECT collection	Peter	0.00325347	CECT10131	AA	het	FALSE
CECT10171-5B	CDT	Larvae of Dacus oleae	Insect	Insect	Spain	no	A	2	euploid	Euploid	homozygous	229	2. Alpechin	CECT collection / State Research Institute of Genetics and Selection of Industrial Microorganisms (Naumov G.I.)	Peter	0.000302977	CECT10171_5B	AA	hom	FALSE
CECT10266	AVB	Tanning liquor	Industrial	Industrial	Spain	no	A	1	euploid	Euploid	homozygous	198	2. Alpechin	CECT collection	Peter	0.000318819	CECT10266	AA	hom	FALSE
CECT10331:9-1	CDR	Flowers of Centaurea alba	Flower	Flower	Spain	no	A	2	euploid	Euploid	homozygous	231	8. Mixed origin	CECT collection / State Research Institute of Genetics and Selection of Industrial Microorganisms (Naumov G.I.)	Peter	0.000265524	CECT10331_9_1	AA	hom	FALSE
CECT10351-1B	CDS	Tomato	Fruit	Fruit	Spain	no	A	2	euploid	Euploid	homozygous	287	1. Wine/European	CECT collection / State Research Institute of Genetics and Selection of Industrial Microorganisms (Naumov G.I.)	Peter	0.000186964	CECT10351_1B	AA	hom	FALSE
CECT10497	ATQ	Alpechin (waste from olive oil production)	Industrial	Industrial	Spain	no	A	2	aneu;+2*9;+1*11;	Gain	homozygous	249	2. Alpechin	CECT collection	Peter	0.000273001	CECT10497	AA	hom	FALSE
CECT10711	AVC	Sake	Sake	Sake	Japan	no	B	2	aneu;-1*1;+1*9;+1*15;	Both	heterozygous	252	25. Sake	CECT collection	Peter	0.000403308	CECT10711	BB	het	FALSE
CECT10712	AVD	Sake	Sake	Sake	Japan	no	B	2	aneu;+1*3;+1*11;	Gain	heterozygous	233	25. Sake	CECT collection	Peter	0.000375677	CECT10712	BB	hom	FALSE
CECT1462	ATV	Beer	Beer	Beer	UK	no	A	4	euploid	Euploid	heterozygous	88	11. Ale beer	CECT collection	Peter	0.00444377	CECT1462	AA	het	FALSE
CECT1478	AVH	Wine	Wine	Wine	Hungary	no	A	2	aneu;+1*2;+1*6;+1*7;+1*10;+1*13;+1*15;+1*16;	Gain	homozygous	266	1. Wine/European	CECT collection	Peter	0.000178313	CECT1478	AA	hom	FALSE
CEY615	BDP	Human feces	Human	Human	French Guiana	no	A	2	euploid	Euploid	heterozygous	277	10. French Guiana human	Institut Pasteur (Christophe d'Enfert and Marie-Elisabeth Bougnoux)	20	0.000938705	CEY615	AA	hom	FALSE
CEY616	BDQ	Human feces	Human	Human	French Guiana	no	A	2	euploid	Euploid	heterozygous	213	10. French Guiana human	Institut Pasteur (Christophe d'Enfert and Marie-Elisabeth Bougnoux)	20	0.00127609	CEY616	AA	hom	FALSE
CEY617	BDR	Human feces	Human	Human	French Guiana	no	A	2	euploid	Euploid	heterozygous	189	10. French Guiana human	Institut Pasteur (Christophe d'Enfert and Marie-Elisabeth Bougnoux)	20	0.000887083	CEY617	AA	hom	FALSE
CEY618	BDS	Human feces	Human	Human	French Guiana	no	A	2	euploid	Euploid	heterozygous	196	10. French Guiana human	Institut Pasteur (Christophe d'Enfert and Marie-Elisabeth Bougnoux)	20	0.00117437	CEY618	AA	hom	FALSE
CEY619	BDT	Human feces	Human	Human	French Guiana	no	A	2	euploid	Euploid	heterozygous	223	10. French Guiana human	Institut Pasteur (Christophe d'Enfert and Marie-Elisabeth Bougnoux)	20	0.00107254	CEY619	AA	hom	FALSE
CEY620	BDV	Human feces	Human	Human	French Guiana	no	A	2	euploid	Euploid	heterozygous	228	10. French Guiana human	Institut Pasteur (Christophe d'Enfert and Marie-Elisabeth Bougnoux)	20	0.000983313	CEY620	AA	hom	FALSE
CEY621	BEA	Human feces	Human	Human	French Guiana	no	A	2	euploid	Euploid	heterozygous	186	10. French Guiana human	Institut Pasteur (Christophe d'Enfert and Marie-Elisabeth Bougnoux)	20	0.000900177	CEY621	AA	het	FALSE
CEY622	BEB	Human feces	Human	Human	French Guiana	no	A	2	euploid	Euploid	heterozygous	307	10. French Guiana human	Institut Pasteur (Christophe d'Enfert and Marie-Elisabeth Bougnoux)	20	0.00117891	CEY622	AA	het	FALSE
CEY623	BEC	Human feces	Human	Human	French Guiana	no	A	2	aneu;+1*12;	Gain	heterozygous	223	10. French Guiana human	Institut Pasteur (Christophe d'Enfert and Marie-Elisabeth Bougnoux)	20	0.000926947	CEY623	AA	hom	FALSE
CEY624	BED	Human feces	Human	Human	French Guiana	no	A	2	euploid	Euploid	heterozygous	217	10. French Guiana human	Institut Pasteur (Christophe d'Enfert and Marie-Elisabeth Bougnoux)	20	0.00118528	CEY624	AA	het	FALSE
CEY625	BEE	Human feces	Human	Human	French Guiana	no	A	2	euploid	Euploid	heterozygous	241	10. French Guiana human	Institut Pasteur (Christophe d'Enfert and Marie-Elisabeth Bougnoux)	20	0.00114805	CEY625	AA	hom	FALSE
CEY646	BMR	Chicken	Nature	Nature	French Guiana	no	A	2	euploid	Euploid	heterozygous	291	10. French Guiana human	Institut Pasteur (Christophe d'Enfert and Marie-Elisabeth Bougnoux)	20	0.000800207	CEY646	AA	hom	FALSE
CEY647	CQS	Molossus molossus (bat)	Nature	Nature	French Guiana	no	A	2	euploid	Euploid	homozygous	243	NA	Institut Pasteur (Christophe d'Enfert and Marie-Elisabeth Bougnoux)	Peter	0.000422394	CEY647	AA	hom	FALSE
CEY649	BMV	Agouti paca (RO)	Nature	Nature	French Guiana	no	A	2	euploid	Euploid	heterozygous	300	10. French Guiana human	Institut Pasteur (Christophe d'Enfert and Marie-Elisabeth Bougnoux)	20	0.000972287	CEY649	AA	het	FALSE
CEY650	BNA	Agouti paca (RO)	Nature	Nature	French Guiana	no	A	2	euploid	Euploid	heterozygous	297	10. French Guiana human	Institut Pasteur (Christophe d'Enfert and Marie-Elisabeth Bougnoux)	20	0.00108608	CEY650	AA	hom	FALSE
CEY651	BNB	Fruits	Fruit	Fruit	French Guiana	no	A	2	euploid	Euploid	heterozygous	284	10. French Guiana human	Institut Pasteur (Christophe d'Enfert and Marie-Elisabeth Bougnoux)	20	0.00121265	CEY651	AA	het	FALSE
CEY652	BNC	Fruits	Fruit	Fruit	French Guiana	no	A	2	euploid	Euploid	heterozygous	334	10. French Guiana human	Institut Pasteur (Christophe d'Enfert and Marie-Elisabeth Bougnoux)	20	0.000829775	CEY652	AA	het	FALSE
CEY653	BND	Fruits	Fruit	Fruit	French Guiana	no	A	2	euploid	Euploid	heterozygous	189	10. French Guiana human	Institut Pasteur (Christophe d'Enfert and Marie-Elisabeth Bougnoux)	20	0.000726621	CEY653	AA	hom	FALSE
CH02	AVN	Pearl millet beer	Beer	Beer	Abengourou, Ivory Coast	no	junk	4	euploid	Euploid	heterozygous	292	6. African beer	Universit≈Ω de Lyon (Michel Aigle)	15	0.00348306	CH02	AA	het	FALSE
CH06	AVP	Pearl millet beer	Beer	Beer	Abengourou, Ivory Coast	no	A	5	aneu;-1*14;	Loss	heterozygous	204	6. African beer	Universit≈Ω de Lyon (Michel Aigle)	15	0.00294125	CH06	AA	het	FALSE
CH10	AVQ	Pearl millet beer	Beer	Beer	Abengourou, Ivory Coast	no	A	5	aneu;+1*4;	Gain	heterozygous	220	6. African beer	Universit≈Ω de Lyon (Michel Aigle)	15	0.0028112	CH10	AA	het	FALSE
CH11	AVR	Pearl millet beer	Beer	Beer	Abengourou, Ivory Coast	no	A	5	aneu;-1*15;	Loss	heterozygous	218	6. African beer	Universit≈Ω de Lyon (Michel Aigle)	15	0.00293184	CH11	AA	het	FALSE
CH13	AVT	Pearl millet beer	Beer	Beer	Abengourou, Ivory Coast	no	A	5	aneu;+1*2;+1*5;	Gain	heterozygous	229	6. African beer	Universit≈Ω de Lyon (Michel Aigle)	15	0.00279975	CH13	AA	het	FALSE
CH14	AVS	Pearl millet beer	Beer	Beer	Abengourou, Ivory Coast	no	A	5	aneu;+1*12;+1*13;	Gain	heterozygous	244	6. African beer	Universit≈Ω de Lyon (Michel Aigle)	15	0.00292132	CH14	AA	het	FALSE
CLIB1040	BHC	Cider brewery, raw apple juice	Cider	Cider	Brittany, France	no	A	2	euploid	Euploid	heterozygous	180	1. Wine/European	CLIB collection (Serge Casaregola)	Peter	0.000367705	CLIB1040	AA	hom	FALSE
CLIB1059	BHD	Cider brewery, half fermenting apple juice	Cider	Cider	Brittany, France	no	A	2	euploid	Euploid	heterozygous	177	M. Mosaic	CLIB collection (Serge Casaregola)	Peter	0.00178309	CLIB1059	AA	hom	FALSE
CLIB1060	BHE	Cider brewery, half fermenting apple juice	Cider	Cider	Brittany, France	no	A	2	aneu;+1*14;	Gain	heterozygous	202	M. Mosaic	CLIB collection (Serge Casaregola)	Peter	0.00146761	CLIB1060	AA	hom	FALSE
CLIB1062	BHF	Cider brewery, half fermenting apple juice	Cider	Cider	Brittany, France	no	A	2	euploid	Euploid	homozygous	283	1. Wine/European	CLIB collection (Serge Casaregola)	Peter	0.000162888	CLIB1062	AA	hom	FALSE
CLIB1070	BHG	Cider brewery, dry cider	Cider	Cider	Lower Normandy, France	no	A	2	euploid	Euploid	heterozygous	271	M. Mosaic	CLIB collection (Serge Casaregola)	Peter	0.00231243	CLIB1070	AA	het	FALSE
CLIB1071	BHH	Cider brewery, dry cider	Cider	Cider	Lower Normandy, France	no	A	2	euploid	Euploid	homozygous	256	M. Mosaic	CLIB collection (Serge Casaregola)	Peter	0.000318255	CLIB1071	AA	hom	FALSE
CLIB1072	BHI	Cider brewery, dry cider	Cider	Cider	Lower Normandy, France	no	A	2	euploid	Euploid	heterozygous	246	M. Mosaic	CLIB collection (Serge Casaregola)	Peter	0.000372184	CLIB1072	AA	hom	FALSE
CLIB1077	BHK	Cider brewery, dry cider	Cider	Cider	Upper Normandy, France	no	A	2	euploid	Euploid	heterozygous	239	M. Mosaic	CLIB collection (Serge Casaregola)	Peter	0.00207694	CLIB1077	AA	hom	FALSE
CLIB1082	BHL	Cider brewery, dry cider	Cider	Cider	Upper Normandy, France	no	B	2	euploid	Euploid	heterozygous	238	M. Mosaic	CLIB collection (Serge Casaregola)	Peter	0.0021646	CLIB1082	AB	het	FALSE
CLIB1083	BHT	Cider brewery, dry cider	Cider	Cider	Upper Normandy, France	no	A	2	euploid	Euploid	homozygous	264	M. Mosaic	CLIB collection (Serge Casaregola)	Peter	0.000236008	CLIB1083	AA	hom	FALSE
CLIB1085	BHM	Cider brewery, dry cider	Cider	Cider	Upper Normandy, France	no	A	2	euploid	Euploid	heterozygous	243	M. Mosaic	CLIB collection (Serge Casaregola)	Peter	0.000495462	CLIB1085	AA	hom	FALSE
CLIB1410	BHN	Rice wine, Oenology	Fermentation	Fermentation	Laos	no	A	2	euploid	Euploid	homozygous	220	1. Wine/European	CLIB collection (Serge Casaregola)	Peter	0.000167385	CLIB1410	AA	hom	FALSE
CLIB1411	BHP	Rice wine, Oenology	Fermentation	Fermentation	Laos	no	B	2	euploid	Euploid	heterozygous	222	26. Asian fermentation	CLIB collection (Serge Casaregola)	Peter	0.00100703	CLIB1411	BB	hom	FALSE
CLIB1412	BHQ	Rice wine, Oenology	Fermentation	Fermentation	Laos	no	B	2	euploid	Euploid	heterozygous	238	26. Asian fermentation	CLIB collection (Serge Casaregola)	Peter	0.000948839	CLIB1412	BB	hom	FALSE
CLIB1413	BHR	Rice wine, Oenology	Fermentation	Fermentation	Laos	no	B	2	euploid	Euploid	heterozygous	242	26. Asian fermentation	CLIB collection (Serge Casaregola)	Peter	0.000950605	CLIB1413	BB	hom	FALSE
CLIB1414	BHS	Rice wine, Oenology	Fermentation	Fermentation	Laos	no	B	2	euploid	Euploid	heterozygous	187	26. Asian fermentation	CLIB collection (Serge Casaregola)	Peter	0.00105691	CLIB1414	BB	hom	FALSE
CLIB154_1b	ACP	Wine	Wine	Wine	Russia	yes	A	1	euploid	Euploid	homozygous	241	1. Wine/European	Kruglyak Laboratory	1	0.000172672	CLIB154_1b	AA	hom	FALSE
CLIB192_1b	AAM	Bakery	Bakery	Bakery	France	yes	B	1	euploid	Euploid	homozygous	188	8. Mixed origin	CLIB collection	1	0.000232592	CLIB192_1b	BB	hom	FALSE
CLIB208_1	ADK	Bakery	Bakery	Bakery	Shanaong, China	no	A	2	aneu;-1*9;	Loss	heterozygous	224	M. Mosaic	CLIB collection	1	0.0025521	CLIB208_1	AA	hom	FALSE
CLIB219_2b	ACQ	Wine	Wine	Wine	Russia	yes	B	1	euploid	Euploid	homozygous	218	18. Far East Asia	CLIB collection / State Research Institute of Genetics and Selection of Industrial Microorganisms (Naumov G.I.)	1	0.000384149	CLIB219_2b	BB	hom	FALSE
CLIB227	ASH	Beer holland	Beer	Beer	Netherlands	no	A	4	aneu;-1*1;-1*5;-1*7;-1*8;+1*9;-1*14;+1*16;	Both	heterozygous	149	11. Ale beer	CLIB collection (Serge Casaregola)	Peter	0.00289035	CLIB227	AA	het	FALSE
CLIB272_2	AAQ	Beer	Beer	Beer	USA	yes	A	1	euploid	Euploid	homozygous	165	7. Mosaic beer	CLIB collection / Charles University, Prague, Czech Republic (Vondrejs V.)	1	0.000349852	CLIB272_2	AA	hom	FALSE
CLIB274_1	AAN	Bakery	Bakery	Bakery	Czech Republic	no	A	2	aneu;-1*3;	Loss	heterozygous	189	8. Mixed origin	CLIB collection	1	0.00354546	CLIB274_1	AA	het	FALSE
CLIB294_1b	ACF	Distillery	Distillery	Distillery	France	yes	A	1	euploid	Euploid	homozygous	202	1. Wine/European	CLIB collection / Bureau National Interprofessionnel du Cognac	1	0.000161426	CLIB294_1b	AA	hom	FALSE
CLIB318_1	ADL	Bakery	Bakery	Bakery	Netherlands	no	A	2	aneu;+1*1;+1*6;+1*9;+1*11;	Gain	heterozygous	216	8. Mixed origin	CLIB collection	1	0.00408001	CLIB318_1	AA	het	FALSE
CLIB324_2	ADM	Bakery	Bakery	Bakery	Vietnam	no	A	2	euploid	Euploid	heterozygous	298	8. Mixed origin	CLIB collection	1	0.00365692	CLIB324_2	AA	hom	FALSE
CLIB326_1	AAP	Bakery	Bakery	Bakery	Australia	no	B	2	euploid	Euploid	heterozygous	197	8. Mixed origin	CLIB collection	1	0.00326884	CLIB326_1	AB	het	FALSE
CLIB340	ASL	Bakery levain	Bakery	Bakery	Anatolia, Turkey	no	B	2	aneu;+1*2;+1*9;	Gain	heterozygous	243	8. Mixed origin	CLIB collection / (Oraler G.)	Peter	0.00287428	CLIB340	BB	hom	FALSE
CLIB382_1b	AAR	Beer	Beer	Beer	Ireland	yes	B	1	euploid	Euploid	homozygous	216	7. Mosaic beer	CLIB collection	1	0.000253921	CLIB382_1b	BB	hom	FALSE
CLIB409	ASM	Sugar cane (plant)	Nature	Nature	Vietnam	no	B	3	aneu;+1*1;+1*6;+1*9;+1*16;	Gain	heterozygous	247	NA	CLIB collection (Serge Casaregola)	Peter	0.00186029	CLIB409	BB	het	FALSE
CLIB413	BEF	Fermenting rice	Fermentation	Fermentation	China	no	B	2	euploid	Euploid	heterozygous	234	26. Asian fermentation	CLIB collection (Serge Casaregola)	Peter	0.00119601	CLIB413	BB	het	FALSE
CLIB413_1b	ACG	Fermenting rice beverage	Fermentation	Fermentation	China	yes	A	1	euploid	Euploid	homozygous	178	M. Mosaic	CLIB collection	1	0.000284288	CLIB413_1b	AA	hom	FALSE
CLIB414	BEG	High sugar foodstuff, Food	Industrial	Industrial	Japan	no	B	2	aneu;+1*16;	Gain	homozygous	264	NA	CLIB collection (Serge Casaregola)	Peter	0.000344618	CLIB414	BB	hom	FALSE
CLIB415	BEH	Fermenting rice (lao chao), Fermented beverage	Fermentation	Fermentation	Taiwan	no	B	2	euploid	Euploid	homozygous	230	26. Asian fermentation	CLIB collection (Serge Casaregola)	Peter	0.000228454	CLIB415	BB	hom	FALSE
CLIB483_1b	ACH	Cider	Cider	Cider	Brittany, France	yes	A	1	euploid	Euploid	homozygous	204	M. Mosaic	CLIB collection	1	0.00027986	CLIB483_1b	AA	hom	FALSE
CLIB484	BFQ	Cider brewery, industrial raw juice	Cider	Cider	Brittany, France	no	A	2	euploid	Euploid	homozygous	263	1. Wine/European	CLIB collection (Serge Casaregola)	Peter	0.000179641	CLIB484	AA	hom	FALSE
CLIB485	BFR	Cider brewery, industrial raw juice	Cider	Cider	Brittany, France	no	A	2	euploid	Euploid	homozygous	236	1. Wine/European	CLIB collection (Serge Casaregola)	Peter	0.000173702	CLIB485	AA	hom	FALSE
CLIB546	BFS	Dairy, cheese (camembert)	Dairy	Dairy	Normandy, France	no	A	2	euploid	Euploid	heterozygous	220	5. French dairy	CLIB collection / Laboratoire de Technologie Laitiere, INA-PG (Serge Casaregola)	Peter	0.00203774	CLIB546	AA	hom	FALSE
CLIB547	BFT	Dairy, cheese (camembert)	Dairy	Dairy	Normandy, France	no	A	2	euploid	Euploid	heterozygous	208	5. French dairy	CLIB collection / Laboratoire de Technologie Laitiere, INA-PG (Serge Casaregola)	Peter	0.000981123	CLIB547	AA	hom	FALSE
CLIB548	BFV	Dairy, cheese (camembert)	Dairy	Dairy	Normandy, France	no	A	2	aneu;+1*11;	Gain	heterozygous	213	5. French dairy	CLIB collection / Laboratoire de Technologie Laitiere, INA-PG (Serge Casaregola)	Peter	0.00230193	CLIB548	AA	het	FALSE
CLIB549	BGA	Dairy, cheese (camembert)	Dairy	Dairy	Normandy, France	no	A	2	euploid	Euploid	heterozygous	224	5. French dairy	CLIB collection / Laboratoire de Technologie Laitiere, INA-PG (Serge Casaregola)	Peter	0.00220291	CLIB549	AA	het	FALSE
CLIB550	BGB	Dairy, cheese (camembert)	Dairy	Dairy	Normandy, France	no	A	2	euploid	Euploid	heterozygous	218	5. French dairy	CLIB collection / Laboratoire de Technologie Laitiere, INA-PG (Serge Casaregola)	Peter	0.0019714	CLIB550	AA	hom	FALSE
CLIB551	BGC	Dairy, cheese (camembert)	Dairy	Dairy	Normandy, France	no	A	2	euploid	Euploid	heterozygous	250	5. French dairy	CLIB collection / Laboratoire de Technologie Laitiere, INA-PG (Serge Casaregola)	Peter	0.00242445	CLIB551	AA	het	FALSE
CLIB552	BGD	Dairy, cheese (camembert)	Dairy	Dairy	Normandy, France	no	A	2	euploid	Euploid	heterozygous	231	5. French dairy	CLIB collection / Laboratoire de Technologie Laitiere, INA-PG (Serge Casaregola)	Peter	0.00178889	CLIB552	AA	hom	FALSE
CLIB553	BGE	Dairy, raw milk	Dairy	Dairy	Normandy, France	no	A	2	euploid	Euploid	heterozygous	225	5. French dairy	CLIB collection / Laboratoire de Technologie Laitiere, INA-PG (Serge Casaregola)	Peter	0.000927615	CLIB553	AA	hom	FALSE
CLIB554	BGF	Dairy, brine	Dairy	Dairy	France	no	A	2	euploid	Euploid	heterozygous	225	5. French dairy	CLIB collection / Laboratoire de Technologie Laitiere, INA-PG (Serge Casaregola)	Peter	0.00216421	CLIB554	AA	hom	FALSE
CLIB555	BGG	Dairy, brine	Dairy	Dairy	France	no	A	2	aneu;+1*11;	Gain	heterozygous	229	5. French dairy	CLIB collection / Laboratoire de Technologie Laitiere, INA-PG (Serge Casaregola)	Peter	0.00231599	CLIB555	AA	hom	FALSE
CLIB556	BGH	Dairy, Saint Maure goat's cheese	Dairy	Dairy	Poitou-Charentes, France	no	A	2	euploid	Euploid	heterozygous	192	5. French dairy	CLIB collection / Laboratoire de Technologie Laitiere, INA-PG (Serge Casaregola)	Peter	0.00194644	CLIB556	AA	het	FALSE
CLIB557	BGI	Dairy, cheese (camembert)	Dairy	Dairy	Normandy, France	no	A	2	euploid	Euploid	heterozygous	231	5. French dairy	CLIB collection / Laboratoire de Technologie Laitiere, INA-PG (Serge Casaregola)	Peter	0.00249206	CLIB557	AA	het	FALSE
CLIB558	BGK	Dairy, cheese (camembert)	Dairy	Dairy	Normandy, France	no	A	2	euploid	Euploid	heterozygous	242	5. French dairy	CLIB collection / Laboratoire de Technologie Laitiere, INA-PG (Serge Casaregola)	Peter	0.00271925	CLIB558	AA	het	FALSE
CLIB559	BGL	Dairy, cheese (camembert)	Dairy	Dairy	Normandy, France	no	A	2	euploid	Euploid	heterozygous	267	5. French dairy	CLIB collection / Laboratoire de Technologie Laitiere, INA-PG (Serge Casaregola)	Peter	0.00220346	CLIB559	AA	hom	FALSE
CLIB560	BGM	Dairy, cheese (camembert)	Dairy	Dairy	Normandy, France	no	A	2	euploid	Euploid	heterozygous	255	5. French dairy	CLIB collection / Laboratoire de Technologie Laitiere, INA-PG (Serge Casaregola)	Peter	0.00201963	CLIB560	AA	hom	FALSE
CLIB561	BGN	Dairy, cheese (camembert)	Dairy	Dairy	Normandy, France	no	A	2	euploid	Euploid	heterozygous	309	5. French dairy	CLIB collection / Laboratoire de Technologie Laitiere, INA-PG (Serge Casaregola)	Peter	0.00189809	CLIB561	AA	het	FALSE
CLIB562	BGP	Dairy, cheese (camembert)	Dairy	Dairy	Normandy, France	no	A	2	euploid	Euploid	heterozygous	74	5. French dairy	CLIB collection / Laboratoire de Technologie Laitiere, INA-PG (Serge Casaregola)	Peter	0.00242408	CLIB562	AA	het	FALSE
CLIB563	BGQ	Dairy, cheese (camembert)	Dairy	Dairy	Normandy, France	no	A	2	euploid	Euploid	heterozygous	305	5. French dairy	CLIB collection / Laboratoire de Technologie Laitiere, INA-PG (Serge Casaregola)	Peter	0.00245176	CLIB563	AA	het	FALSE
CLIB564	BGR	Dairy, cheese (camembert)	Dairy	Dairy	Normandy, France	no	A	2	aneu;+1*12;	Gain	heterozygous	219	5. French dairy	CLIB collection / Laboratoire de Technologie Laitiere, INA-PG (Serge Casaregola)	Peter	0.00238448	CLIB564	AA	het	FALSE
CLIB630	ASN	Dairy cheese (camembert)	Dairy	Dairy	Normandy, France	no	A	2	euploid	Euploid	heterozygous	248	5. French dairy	CLIB collection / Laboratoire de Technologie Laitiere, INA-PG (Serge Casaregola)	Peter	0.0026991	CLIB630	AA	hom	FALSE
CLIB631	BGS	Dairy, cheese (camembert)	Dairy	Dairy	Normandy, France	no	A	2	aneu;+1*10;	Gain	heterozygous	235	5. French dairy	CLIB collection / Laboratoire de Technologie Laitiere, INA-PG (Serge Casaregola)	Peter	0.00247215	CLIB631	AA	het	FALSE
CLIB648	BGT	Dairy, whey	Dairy	Dairy	Alpes, France	no	A	2	euploid	Euploid	heterozygous	244	5. French dairy	CLIB collection (Serge Casaregola)	Peter	0.00175741	CLIB648	AA	het	FALSE
CLIB649	BGV	Dairy, whey	Dairy	Dairy	Alpes, France	no	A	2	euploid	Euploid	heterozygous	205	5. French dairy	CLIB collection (Serge Casaregola)	Peter	0.00179435	CLIB649	AA	het	FALSE
CLIB650	BEI	Bili Bili beer, brewery	Beer	Beer	Chad	no	A	3	euploid	Euploid	heterozygous	261	6. African beer	CLIB collection (Serge Casaregola)	Peter	0.00182009	CLIB650	AA	het	FALSE
CLIB651	BEK	Beer leaven for Bili Bili beer, brewery	Beer	Beer	Chad	no	A	4	euploid	Euploid	heterozygous	242	6. African beer	CLIB collection (Serge Casaregola)	Peter	0.00229656	CLIB651	AA	het	FALSE
CLIB653	BEM	Beer leaven for Bili Bili beer, brewery	Beer	Beer	Chad	no	A	4	euploid	Euploid	heterozygous	217	6. African beer	CLIB collection (Serge Casaregola)	Peter	0.00232828	CLIB653	AA	het	FALSE
CLIB654	BEN	Beer leaven for Bili Bili beer, brewery	Beer	Beer	Chad	no	A	3	euploid	Euploid	heterozygous	231	6. African beer	CLIB collection (Serge Casaregola)	Peter	0.00181993	CLIB654	AA	het	FALSE
CLIB655	BHA	Beer leaven for Bili Bili beer, brewery	Beer	Beer	Chad	no	A	3	euploid	Euploid	heterozygous	223	6. African beer	CLIB collection (Serge Casaregola)	Peter	0.00181922	CLIB655	AA	het	FALSE
CLIB889	BHB	Bakery	Bakery	Bakery	Australia	no	A	2	euploid	Euploid	heterozygous	203	1. Wine/European	CLIB collection / INRA Gringnon, France (Nguyen H.V.)	Peter	0.0011355	CLIB889	AA	hom	FALSE
CLQCA_02-003	AKP	Heart of palm processing equipment	Industrial	Industrial	Santo Domingo, Ecuador	no	A	2	euploid	Euploid	homozygous	208	1. Wine/European	National Collection of Yeast Cultures (NCYC)(Stephen A James) and Colecci‚Äîn de Levaduras Quito Cat‚Äîlica (CLQCA)(Enrique Javier Carvajal Barriga)	Peter	0.000178914	CLQCA_02_003	AA	hom	FALSE
CLQCA_04-021	AKQ	Beetle	Insect	Insect	Los Rios, Ecuador	no	A	2	euploid	Euploid	homozygous	224	M. Mosaic	National Collection of Yeast Cultures (NCYC)(Stephen A James) and Colecci‚Äîn de Levaduras Quito Cat‚Äîlica (CLQCA)(Enrique Javier Carvajal Barriga)	Peter	0.000321401	CLQCA_04_021	AA	hom	FALSE
CLQCA_05-006	AKR	Rotten fruit	Fruit	Fruit	Guayas, Ecuador	no	B	2	euploid	Euploid	heterozygous	299	26. Asian fermentation	National Collection of Yeast Cultures (NCYC)(Stephen A James) and Colecci‚Äîn de Levaduras Quito Cat‚Äîlica (CLQCA)(Enrique Javier Carvajal Barriga)	Peter	0.000722338	CLQCA_05_006	BB	het	FALSE
CLQCA_09-001	AKS	Flower (Opuntia sp.)	Flower	Flower	Imbabura, Ecuador	no	B	2	euploid	Euploid	homozygous	207	M. Mosaic	National Collection of Yeast Cultures (NCYC)(Stephen A James) and Colecci‚Äîn de Levaduras Quito Cat‚Äîlica (CLQCA)(Enrique Javier Carvajal Barriga)	Peter	0.000356252	CLQCA_09_001	BB	hom	FALSE
CLQCA_10-003	AKT	Stingless bee	Insect	Insect	Pichincha, Ecuador	no	B	2	euploid	Euploid	heterozygous	186	8. Mixed origin	National Collection of Yeast Cultures (NCYC)(Stephen A James) and Colecci‚Äîn de Levaduras Quito Cat‚Äîlica (CLQCA)(Enrique Javier Carvajal Barriga)	Peter	0.00366443	CLQCA_10_003	AB	het	FALSE
CLQCA_10-027	AKV	Grass	Nature	Nature	Pichincha, Ecuador	no	A	2	euploid	Euploid	homozygous	246	1. Wine/European	National Collection of Yeast Cultures (NCYC)(Stephen A James) and Colecci‚Äîn de Levaduras Quito Cat‚Äîlica (CLQCA)(Enrique Javier Carvajal Barriga)	Peter	0.000192653	CLQCA_10_027	AA	hom	FALSE
CLQCA_10-386	BDL	Beer	Beer	Beer	Equador	no	B	2	euploid	Euploid	heterozygous	240	8. Mixed origin	National Collection of Yeast Cultures (NCYC)(Stephen A James) and Colecci‚Äîn de Levaduras Quito Cat‚Äîlica (CLQCA)(Enrique Javier Carvajal Barriga)	Peter	0.00360274	CLQCA_10_386	BB	hom	FALSE
CLQCA_10-619	ALA	Beetle	Insect	Insect	Pichincha, Ecuador	no	B	2	euploid	Euploid	heterozygous	241	26. Asian fermentation	National Collection of Yeast Cultures (NCYC)(Stephen A James) and Colecci‚Äîn de Levaduras Quito Cat‚Äîlica (CLQCA)(Enrique Javier Carvajal Barriga)	Peter	0.000720855	CLQCA_10_619	BB	hom	FALSE
CLQCA_10-620	ALB	Orthopteran insect	Insect	Insect	Pichincha, Ecuador	no	B	2	euploid	Euploid	heterozygous	219	26. Asian fermentation	National Collection of Yeast Cultures (NCYC)(Stephen A James) and Colecci‚Äîn de Levaduras Quito Cat‚Äîlica (CLQCA)(Enrique Javier Carvajal Barriga)	Peter	0.000723652	CLQCA_10_620	BB	hom	FALSE
CLQCA_11-024	ALC	Unidentified aquatic plant	Nature	Nature	Cotopaxi, Ecuador	no	B	2	euploid	Euploid	heterozygous	261	26. Asian fermentation	National Collection of Yeast Cultures (NCYC)(Stephen A James) and Colecci‚Äîn de Levaduras Quito Cat‚Äîlica (CLQCA)(Enrique Javier Carvajal Barriga)	Peter	0.000686992	CLQCA_11_024	BB	hom	FALSE
CLQCA_13-023	ALD	Wax on rock surface	Nature	Nature	Bolivar, Ecuador	no	A	2	euploid	Euploid	heterozygous	221	5. French dairy	National Collection of Yeast Cultures (NCYC)(Stephen A James) and Colecci‚Äîn de Levaduras Quito Cat‚Äîlica (CLQCA)(Enrique Javier Carvajal Barriga)	Peter	0.00188076	CLQCA_13_023	AA	het	FALSE
CLQCA_17-060	ALE	Hemipteran insect	Insect	Insect	Loja, Ecuador	no	A	2	euploid	Euploid	homozygous	248	1. Wine/European	National Collection of Yeast Cultures (NCYC)(Stephen A James) and Colecci‚Äîn de Levaduras Quito Cat‚Äîlica (CLQCA)(Enrique Javier Carvajal Barriga)	Peter	0.000194078	CLQCA_17_060	AA	hom	FALSE
CLQCA_17-111	CRE	Termite mound	Insect	Insect	Ecuador	no	B	3	euploid	Euploid	heterozygous	221	M. Mosaic	National Collection of Yeast Cultures (NCYC)(Stephen A James) and Colecci‚Äîn de Levaduras Quito Cat‚Äîlica (CLQCA)(Enrique Javier Carvajal Barriga)	Peter	0.00478961	CLQCA_17_111	BB	het	FALSE
CLQCA_18-003	ALG	Cocoa fruit	Fruit	Fruit	Sucumbios, Ecuador	no	A	2	euploid	Euploid	homozygous	226	M. Mosaic	National Collection of Yeast Cultures (NCYC)(Stephen A James) and Colecci‚Äîn de Levaduras Quito Cat‚Äîlica (CLQCA)(Enrique Javier Carvajal Barriga)	Peter	0.000246083	CLQCA_18_003	AA	hom	FALSE
CLQCA_19-011	ALH	Horse dung	Nature	Nature	Napo, Ecuador	no	B	2	euploid	Euploid	heterozygous	198	26. Asian fermentation	National Collection of Yeast Cultures (NCYC)(Stephen A James) and Colecci‚Äîn de Levaduras Quito Cat‚Äîlica (CLQCA)(Enrique Javier Carvajal Barriga)	Peter	0.000715207	CLQCA_19_011	BB	hom	FALSE
CLQCA_20-060	ALI	Water in leaf with organic matter	Water	Water	Yasuni National Park, Orellana, Ecuador	no	A	2	euploid	Euploid	heterozygous	210	NA	National Collection of Yeast Cultures (NCYC)(Stephen A James) and Colecci‚Äîn de Levaduras Quito Cat‚Äîlica (CLQCA)(Enrique Javier Carvajal Barriga)	Peter	0.00187036	CLQCA_20_060	AA	hom	FALSE
CLQCA_20-156	CCC	Flower (Gesneriaceae sp.)	Flower	Flower	Yasuni, Orellana	no	B	2	euploid	Euploid	homozygous	260	21. Ecuadorean	National Collection of Yeast Cultures (NCYC)(Stephen A James) and Colecci‚Äîn de Levaduras Quito Cat‚Äîlica (CLQCA)(Enrique Javier Carvajal Barriga)	Peter	0.000376716	CLQCA_20_156	BB	hom	FALSE
CLQCA_20-184	CCD	Flower from Heliconia sp.	Flower	Flower	Yasuni, Orellana	no	B	2	euploid	Euploid	homozygous	401	21. Ecuadorean	National Collection of Yeast Cultures (NCYC)(Stephen A James) and Colecci‚Äîn de Levaduras Quito Cat‚Äîlica (CLQCA)(Enrique Javier Carvajal Barriga)	Peter	0.000368763	CLQCA_20_184	BB	hom	FALSE
CLQCA_20-221	CCE	Flower from Heliconia sp.	Flower	Flower	Yasuni, Orellana	no	B	2	euploid	Euploid	homozygous	328	21. Ecuadorean	National Collection of Yeast Cultures (NCYC)(Stephen A James) and Colecci‚Äîn de Levaduras Quito Cat‚Äîlica (CLQCA)(Enrique Javier Carvajal Barriga)	Peter	0.000375569	CLQCA_20_221	BB	hom	FALSE
CLQCA_20-246	CCF	Termite mound	Insect	Insect	Yasuni, Orellana	no	B	2	euploid	Euploid	homozygous	379	21. Ecuadorean	National Collection of Yeast Cultures (NCYC)(Stephen A James) and Colecci‚Äîn de Levaduras Quito Cat‚Äîlica (CLQCA)(Enrique Javier Carvajal Barriga)	Peter	0.000373142	CLQCA_20_246	BB	hom	FALSE
CLQCA_20-248	CCI	Termite mound	Insect	Insect	Yasuni, Orellana	no	B	2	euploid	Euploid	homozygous	209	21. Ecuadorean	National Collection of Yeast Cultures (NCYC)(Stephen A James) and Colecci‚Äîn de Levaduras Quito Cat‚Äîlica (CLQCA)(Enrique Javier Carvajal Barriga)	Peter	0.000383735	CLQCA_20_248	BB	hom	FALSE
CLQCA_20-259	CCG	Decaying fruit	Fruit	Fruit	Yasuni, Orellana	no	B	2	euploid	Euploid	homozygous	304	21. Ecuadorean	National Collection of Yeast Cultures (NCYC)(Stephen A James) and Colecci‚Äîn de Levaduras Quito Cat‚Äîlica (CLQCA)(Enrique Javier Carvajal Barriga)	Peter	0.000370298	CLQCA_20_259	BB	hom	FALSE
CLQCA_20-314	CCH	Termite mound	Insect	Insect	Yasuni, Orellana	no	B	2	aneu;+1*16;	Gain	homozygous	191	21. Ecuadorean	National Collection of Yeast Cultures (NCYC)(Stephen A James) and Colecci‚Äîn de Levaduras Quito Cat‚Äîlica (CLQCA)(Enrique Javier Carvajal Barriga)	Peter	0.000356229	CLQCA_20_314	BB	hom	FALSE
CLQCA_24SC-235	ALK	Tree exudate (Bursera graveolens)	Tree	Tree	Galapagos, Ecuador	no	B	2	aneu;+1*5;	Gain	heterozygous	176	26. Asian fermentation	National Collection of Yeast Cultures (NCYC)(Stephen A James) and Colecci‚Äîn de Levaduras Quito Cat‚Äîlica (CLQCA)(Enrique Javier Carvajal Barriga)	Peter	0.000615141	CLQCA_24SC_235	BB	hom	FALSE
D-1	CAH	Wine conserved in amphora	Wine	Wine	Georgia	no	A	2	aneu;+1*4;	Gain	heterozygous	210	1. Wine/European	University of Basilicata (Angela Capece and Patrizia Romano)	7	0.000840037	D_1	AA	hom	FALSE
D-18	CBC	Wine conserved in amphora	Wine	Wine	Georgia	no	A	2	euploid	Euploid	homozygous	165	1. Wine/European	University of Basilicata (Angela Capece and Patrizia Romano)	7	0.000151066	D_18	AA	hom	FALSE
D-21	CBE	Wine conserved in amphora	Wine	Wine	Georgia	no	A	2	euploid	Euploid	heterozygous	191	1. Wine/European	University of Basilicata (Angela Capece and Patrizia Romano)	7	0.000548489	D_21	AA	het	FALSE
D-4	CAI	Wine conserved in amphora	Wine	Wine	Georgia	no	A	2	euploid	Euploid	heterozygous	54	1. Wine/European	University of Basilicata (Angela Capece and Patrizia Romano)	7	0.00135489	D_4	AA	het	FALSE
D3742	BSK	Spoiled ice tea	Unknown	Unknown	France	no	B	2	euploid	Euploid	heterozygous	250	M. Mosaic	National Collection of Yeast Cultures (NCYC)(Stephen A James and Ian Roberts)	Peter	0.00289777	D3742	BB	hom	FALSE
DBVPG1014	BHV	Grape must	Wine	Must	Umbria, Italy	no	A	2	euploid	Euploid	homozygous	221	1. Wine/European	DBVPG collection (Benedetta Turchetti and Pietro Buzzini)	Peter	0.000199398	DBVPG1014	AA	hom	FALSE
DBVPG1029	BIA	Fermenting Grape must	Wine	Must	Colli di Roma, Lazio, Italy	no	A	2	euploid	Euploid	homozygous	194	1. Wine/European	DBVPG collection (Benedetta Turchetti and Pietro Buzzini)	Peter	0.00017493	DBVPG1029	AA	hom	FALSE
DBVPG1041	BIB	Grape must	Wine	Must	Tuscany, Italy	no	A	2	euploid	Euploid	homozygous	117	1. Wine/European	DBVPG collection (Benedetta Turchetti and Pietro Buzzini)	Peter	0.000180732	DBVPG1041	AA	hom	FALSE
DBVPG1056	BIC	grape must	Wine	Must	production zone of Chianti wine, Italy	no	A	2	euploid	Euploid	homozygous	314	1. Wine/European	DBVPG collection (Benedetta Turchetti and Pietro Buzzini)	Peter	0.000183655	DBVPG1056	AA	hom	FALSE
DBVPG1057	BNE	Grape must	Wine	Must	Colli Romani, Lazio, Italy	no	A	2	euploid	Euploid	homozygous	224	1. Wine/European	DBVPG collection (Benedetta Turchetti and Pietro Buzzini)	Peter	0.000230081	DBVPG1057	AA	hom	FALSE
DBVPG1058	BID	Baker's yeast	Bakery	Bakery	Pazzaglia, Italy	no	A	2	euploid	Euploid	homozygous	256	1. Wine/European	DBVPG collection (Benedetta Turchetti and Pietro Buzzini)	Peter	0.00014874	DBVPG1058	AA	hom	FALSE
DBVPG1074	BIE	Grape must	Wine	Must	San Severo, Puglia, Italy	no	B	2	euploid	Euploid	heterozygous	217	M. Mosaic	DBVPG collection (Benedetta Turchetti and Pietro Buzzini)	Peter	0.0052759	DBVPG1074	AB	het	FALSE
DBVPG1076	BIF	Grape must	Wine	Must	Locorotondo, Puglia, Italy	no	A	2	euploid	Euploid	homozygous	240	1. Wine/European	DBVPG collection (Benedetta Turchetti and Pietro Buzzini)	Peter	0.000188361	DBVPG1076	AA	hom	FALSE
DBVPG1078	BNF	Grape must	Wine	Must	San Ferdinando, Italy	no	A	2	euploid	Euploid	homozygous	199	1. Wine/European	DBVPG collection (Benedetta Turchetti and Pietro Buzzini)	Peter	0.000177867	DBVPG1078	AA	hom	FALSE
DBVPG1080	BIG	Grape must	Wine	Must	Barletta, Italy	no	A	2	aneu;-1*1;	1only	homozygous	277	1. Wine/European	DBVPG collection (Benedetta Turchetti and Pietro Buzzini)	Peter	0.000155932	DBVPG1080	AA	hom	TRUE
DBVPG1085	BNG	Grape must	Wine	Must	Corato, Italy	no	A	3	euploid	Euploid	heterozygous	244	1. Wine/European	DBVPG collection (Benedetta Turchetti and Pietro Buzzini)	Peter	0.00152342	DBVPG1085	AA	het	FALSE
DBVPG1105	BIH	Grapes	Wine	Fruit	Adelaide, Australia	no	A	2	euploid	Euploid	heterozygous	285	1. Wine/European	DBVPG collection (Benedetta Turchetti and Pietro Buzzini)	Peter	0.000619192	DBVPG1105	AA	hom	FALSE
DBVPG1106	BII	Grapes	Wine	Fruit	Australia	no	A	2	euploid	Euploid	homozygous	257	1. Wine/European	DBVPG collection (Benedetta Turchetti and Pietro Buzzini)	Peter	0.000189153	DBVPG1106	AA	hom	FALSE
DBVPG1107	BIK	Grapes	Wine	Fruit	McLaren Valley, Australia	no	A	2	euploid	Euploid	homozygous	172	1. Wine/European	DBVPG collection (Benedetta Turchetti and Pietro Buzzini)	Peter	0.000176517	DBVPG1107	AA	hom	FALSE
DBVPG1108	BIL	Grapes	Wine	Fruit	Australia	no	A	2	euploid	Euploid	homozygous	174	1. Wine/European	DBVPG collection (Benedetta Turchetti and Pietro Buzzini)	Peter	0.000187579	DBVPG1108	AA	hom	FALSE
DBVPG1122	BIM	Grape must	Wine	Must	Lucera, Puglia, Italy	no	A	2	euploid	Euploid	homozygous	253	1. Wine/European	DBVPG collection (Benedetta Turchetti and Pietro Buzzini)	Peter	0.000148313	DBVPG1122	AA	hom	FALSE
DBVPG1123	BIN	Grape must	Wine	Must	Manduria, Taranto, Italy	no	A	2	euploid	Euploid	homozygous	213	1. Wine/European	DBVPG collection (Benedetta Turchetti and Pietro Buzzini)	Peter	0.000146375	DBVPG1123	AA	hom	FALSE
DBVPG1125	BIP	Grape must	Wine	Must	Torre dei Passeri, Italy	no	A	2	aneu;+1*8;	Gain	homozygous	252	1. Wine/European	DBVPG collection (Benedetta Turchetti and Pietro Buzzini)	Peter	0.000209784	DBVPG1125	AA	hom	FALSE
DBVPG1126	BIQ	Grape must	Wine	Must	Aquila, Italy	no	A	1	aneu;+1*3;	Gain	homozygous	267	1. Wine/European	DBVPG collection (Benedetta Turchetti and Pietro Buzzini)	Peter	0.000214658	DBVPG1126	AA	hom	FALSE
DBVPG1127	BIR	Grape must	Wine	Must	Popoli, Italy	no	A	2	euploid	Euploid	heterozygous	290	1. Wine/European	DBVPG collection (Benedetta Turchetti and Pietro Buzzini)	Peter	0.000964206	DBVPG1127	AA	het	FALSE
DBVPG1129	BIS	Grape must	Wine	Must	Senigallia, Italy	no	A	2	euploid	Euploid	homozygous	227	1. Wine/European	DBVPG collection (Benedetta Turchetti and Pietro Buzzini)	Peter	0.000155381	DBVPG1129	AA	hom	FALSE
DBVPG1145	BIT	Grape must	Wine	Must	Corvo, Sicily, Italy	no	A	2	euploid	Euploid	homozygous	275	1. Wine/European	DBVPG collection (Benedetta Turchetti and Pietro Buzzini)	Peter	0.000210126	DBVPG1145	AA	hom	FALSE
DBVPG1163	BKA	Cherries	Fruit	Fruit	Aurum, Sicily, Italy	no	A	2	euploid	Euploid	homozygous	228	1. Wine/European	DBVPG collection (Benedetta Turchetti and Pietro Buzzini)	Peter	0.00014624	DBVPG1163	AA	hom	FALSE
DBVPG1339	BKC	Grape must	Wine	Must	Netherlands	no	A	2	euploid	Euploid	heterozygous	274	1. Wine/European	DBVPG collection (Benedetta Turchetti and Pietro Buzzini)	Peter	0.000631203	DBVPG1339	AA	hom	FALSE
DBVPG1339_1b	ACR	Grapes	Wine	Fruit	Netherlands	yes	A	1	euploid	Euploid	homozygous	273	1. Wine/European	Kruglyak Laboratory	1	0.000183544	DBVPG1339_1b	AA	hom	FALSE
DBVPG1374	BKD	Soil	Soil	Soil	Netherlands	no	A	2	euploid	Euploid	heterozygous	318	1. Wine/European	DBVPG collection (Benedetta Turchetti and Pietro Buzzini)	Peter	0.000784756	DBVPG1374	AA	hom	FALSE
DBVPG1380	BKE	Grape must	Wine	Must	Rufina, Italy	no	A	2	euploid	Euploid	homozygous	204	1. Wine/European	DBVPG collection (Benedetta Turchetti and Pietro Buzzini)	Peter	0.000186254	DBVPG1380	AA	hom	FALSE
DBVPG1473	BKF	Wine	Wine	Wine	Piemonte, Italy	no	A	2	euploid	Euploid	heterozygous	228	1. Wine/European	DBVPG collection (Benedetta Turchetti and Pietro Buzzini)	Peter	0.000778809	DBVPG1473	AA	hom	FALSE
DBVPG1490	BKG	Grape must	Wine	Must	Etna, Sicily, Italy	no	A	2	euploid	Euploid	heterozygous	281	1. Wine/European	DBVPG collection (Benedetta Turchetti and Pietro Buzzini)	Peter	0.000430656	DBVPG1490	AA	hom	FALSE
DBVPG1523	BKH	Grape must	Wine	Must	Trentino, Italy	no	A	2	euploid	Euploid	homozygous	248	1. Wine/European	DBVPG collection (Benedetta Turchetti and Pietro Buzzini)	Peter	0.000152321	DBVPG1523	AA	hom	FALSE
DBVPG1554	BKI	Wine	Wine	Wine	Dalmatia	no	A	2	euploid	Euploid	homozygous	242	1. Wine/European	DBVPG collection (Benedetta Turchetti and Pietro Buzzini)	Peter	0.000151527	DBVPG1554	AA	hom	FALSE
DBVPG1555	BKK	Unknown	Unknown	Unknown	Radgona, Slovenia	no	A	2	euploid	Euploid	homozygous	229	1. Wine/European	DBVPG collection (Benedetta Turchetti and Pietro Buzzini)	Peter	0.000244075	DBVPG1555	AA	hom	FALSE
DBVPG1564	BKL	Grape must	Wine	Must	Dolianova, Sardinia, Italy	no	A	2	euploid	Euploid	homozygous	245	1. Wine/European	DBVPG collection (Benedetta Turchetti and Pietro Buzzini)	Peter	0.000190593	DBVPG1564	AA	hom	FALSE
DBVPG1577	BKM	Grape must	Wine	Must	Elmas, Sardinia, Italy	no	A	2	euploid	Euploid	heterozygous	241	1. Wine/European	DBVPG collection (Benedetta Turchetti and Pietro Buzzini)	Peter	0.000628033	DBVPG1577	AA	het	FALSE
DBVPG1580	BKN	Grape must	Wine	Must	Sardinia, Italy	no	A	2	euploid	Euploid	homozygous	222	1. Wine/European	DBVPG collection (Benedetta Turchetti and Pietro Buzzini)	Peter	0.000171644	DBVPG1580	AA	hom	FALSE
DBVPG1581	BKP	Grape must	Wine	Must	Marassinai, Sardinia, Italy	no	A	2	aneu;+1*8;	Gain	heterozygous	175	1. Wine/European	DBVPG collection (Benedetta Turchetti and Pietro Buzzini)	Peter	0.000617667	DBVPG1581	AA	hom	FALSE
DBVPG1584	BKQ	Unknown	Unknown	Unknown	Porec, Istria	no	A	2	euploid	Euploid	heterozygous	237	1. Wine/European	DBVPG collection (Benedetta Turchetti and Pietro Buzzini)	Peter	0.000340181	DBVPG1584	AA	hom	FALSE
DBVPG1594	BKR	Grape must	Wine	Must	Los Cerros, La Mancha, Spain	no	A	2	euploid	Euploid	homozygous	261	1. Wine/European	DBVPG collection (Benedetta Turchetti and Pietro Buzzini)	Peter	0.000156503	DBVPG1594	AA	hom	FALSE
DBVPG1595	BKS	Grape must	Wine	Must	La Mancha, Spain	no	A	2	euploid	Euploid	heterozygous	239	1. Wine/European	DBVPG collection (Benedetta Turchetti and Pietro Buzzini)	Peter	0.000520337	DBVPG1595	AA	het	FALSE
DBVPG1596	BKT	Grape must	Wine	Must	Santa Cruz de los Canamos, La Mancha, Spain	no	A	2	euploid	Euploid	homozygous	228	1. Wine/European	DBVPG collection (Benedetta Turchetti and Pietro Buzzini)	Peter	0.000185263	DBVPG1596	AA	hom	FALSE
DBVPG1599	BLA	Grape must	Wine	Must	Cerro del Moro, La Mancha, Spain	no	A	2	euploid	Euploid	homozygous	266	1. Wine/European	DBVPG collection (Benedetta Turchetti and Pietro Buzzini)	Peter	0.000177347	DBVPG1599	AA	hom	FALSE
DBVPG1601	BLB	Grape must	Wine	Must	Casa del Rey, La Mancha, Spain	no	A	2	euploid	Euploid	homozygous	239	1. Wine/European	DBVPG collection (Benedetta Turchetti and Pietro Buzzini)	Peter	0.000150736	DBVPG1601	AA	hom	FALSE
DBVPG1606	BLC	Grape must	Wine	Must	Villarta de San Juan, La Mancha, Spain	no	A	2	euploid	Euploid	heterozygous	309	1. Wine/European	DBVPG collection (Benedetta Turchetti and Pietro Buzzini)	Peter	0.000316384	DBVPG1606	AA	hom	FALSE
DBVPG1608	BLD	Grape must	Wine	Must	La Mancha, Spain	no	A	2	euploid	Euploid	homozygous	270	1. Wine/European	DBVPG collection (Benedetta Turchetti and Pietro Buzzini)	Peter	0.000171496	DBVPG1608	AA	hom	FALSE
DBVPG1611	BLE	Grape must	Wine	Must	Retamosa, La Mancha, Spain	no	A	2	euploid	Euploid	homozygous	330	1. Wine/European	DBVPG collection (Benedetta Turchetti and Pietro Buzzini)	Peter	0.000159593	DBVPG1611	AA	hom	FALSE
DBVPG1615	BLF	Grape must	Wine	Must	La Mancha, Spain	no	A	2	euploid	Euploid	heterozygous	235	1. Wine/European	DBVPG collection (Benedetta Turchetti and Pietro Buzzini)	Peter	0.000555208	DBVPG1615	AA	hom	FALSE
DBVPG1616-1D	CDV	Soil	Soil	Soil	Spain	no	A	2	euploid	Euploid	homozygous	275	1. Wine/European	DBVPG collection / State Research Institute of Genetics and Selection of Industrial Microorganisms (Naumov G.I.)	Peter	0.000148989	DBVPG1616_1D	AA	hom	FALSE
DBVPG1617-5A	CEA	Soil	Soil	Soil	Spain	yes	A	1	euploid	Euploid	homozygous	267	1. Wine/European	DBVPG collection / State Research Institute of Genetics and Selection of Industrial Microorganisms (Naumov G.I.)	Peter	0.000155126	DBVPG1617_5A	AA	hom	FALSE
DBVPG1619-4B	CEB	Soil	Soil	Soil	Spain	yes	A	1	euploid	Euploid	homozygous	239	1. Wine/European	DBVPG collection / State Research Institute of Genetics and Selection of Industrial Microorganisms (Naumov G.I.)	Peter	0.000166425	DBVPG1619_4B	AA	hom	FALSE
DBVPG1620-1A	CEC	Soil	Soil	Soil	Spain	no	A	2	euploid	Euploid	homozygous	270	1. Wine/European	DBVPG collection / State Research Institute of Genetics and Selection of Industrial Microorganisms (Naumov G.I.)	Peter	0.000165188	DBVPG1620_1A	AA	hom	FALSE
DBVPG1621-5A	CED	Soil	Soil	Soil	Spain	no	A	2	euploid	Euploid	homozygous	270	1. Wine/European	DBVPG collection / State Research Institute of Genetics and Selection of Industrial Microorganisms (Naumov G.I.)	Peter	0.000170187	DBVPG1621_5A	AA	hom	FALSE
DBVPG1622-8B	CEE	Soil	Soil	Soil	Spain	no	A	2	euploid	Euploid	homozygous	243	1. Wine/European	DBVPG collection / State Research Institute of Genetics and Selection of Industrial Microorganisms (Naumov G.I.)	Peter	0.000162063	DBVPG1622_8B	AA	hom	FALSE
DBVPG1623-2A	CEF	Soil	Soil	Soil	Spain	no	A	2	euploid	Euploid	homozygous	250	1. Wine/European	DBVPG collection / State Research Institute of Genetics and Selection of Industrial Microorganisms (Naumov G.I.)	Peter	0.000164096	DBVPG1623_2A	AA	hom	FALSE
DBVPG1625	BLG	Grape must	Wine	Must	La Enconienda, La Mancha, Spain	no	A	2	euploid	Euploid	heterozygous	300	1. Wine/European	DBVPG collection (Benedetta Turchetti and Pietro Buzzini)	Peter	0.000938115	DBVPG1625	AA	het	FALSE
DBVPG1626	BLH	Grape must	Wine	Must	La Mancha, Spain	no	A	2	euploid	Euploid	homozygous	287	1. Wine/European	DBVPG collection (Benedetta Turchetti and Pietro Buzzini)	Peter	0.000157745	DBVPG1626	AA	hom	FALSE
DBVPG1629	BLI	Grape must	Wine	Must	La Mancha, Spain	no	A	2	euploid	Euploid	heterozygous	372	1. Wine/European	DBVPG collection (Benedetta Turchetti and Pietro Buzzini)	Peter	0.000970839	DBVPG1629	AA	het	FALSE
DBVPG1631	BLK	Grape must treated with sulfur dioxide	Wine	Must	Valdepenas, La Mancha, Spain	no	A	2	euploid	Euploid	homozygous	267	1. Wine/European	DBVPG collection (Benedetta Turchetti and Pietro Buzzini)	Peter	0.000233945	DBVPG1631	AA	hom	FALSE
DBVPG1632	BLL	Grape must	Wine	Must	Abertura, La Mancha, Spain	no	A	2	euploid	Euploid	heterozygous	293	1. Wine/European	DBVPG collection (Benedetta Turchetti and Pietro Buzzini)	Peter	0.000768405	DBVPG1632	AA	hom	FALSE
DBVPG1656	BLM	Grape must treated with sulfur dioxide	Wine	Must	Los Campillos, La Mancha, Spain	no	A	2	euploid	Euploid	homozygous	306	1. Wine/European	DBVPG collection (Benedetta Turchetti and Pietro Buzzini)	Peter	0.000183896	DBVPG1656	AA	hom	FALSE
DBVPG1659	BLN	Grape must	Wine	Must	Campo de Santiago, La Mancha, Spain	no	A	2	euploid	Euploid	heterozygous	267	1. Wine/European	DBVPG collection (Benedetta Turchetti and Pietro Buzzini)	Peter	0.000548644	DBVPG1659	AA	het	FALSE
DBVPG1661	BLP	Grape must	Wine	Must	Los Polos, La Mancha, Spain	no	A	2	euploid	Euploid	heterozygous	303	1. Wine/European	DBVPG collection (Benedetta Turchetti and Pietro Buzzini)	Peter	0.000476908	DBVPG1661	AA	het	FALSE
DBVPG1669	BLQ	Grape must	Wine	Must	Cenicero, Rioja, Spain	no	A	2	aneu;+1*11;	Gain	homozygous	296	1. Wine/European	DBVPG collection (Benedetta Turchetti and Pietro Buzzini)	Peter	0.000240998	DBVPG1669	AA	hom	FALSE
DBVPG1685	BNH	Grape must	Wine	Must	Haro, Rioja, Spain	no	A	2	euploid	Euploid	homozygous	191	1. Wine/European	DBVPG collection (Benedetta Turchetti and Pietro Buzzini)	Peter	0.000167408	DBVPG1685	AA	hom	FALSE
DBVPG1699	BNI	Grape must	Wine	Must	De Casa la Reina, Rioja, Spain	no	A	2	euploid	Euploid	homozygous	270	1. Wine/European	DBVPG collection (Benedetta Turchetti and Pietro Buzzini)	Peter	0.000192625	DBVPG1699	AA	hom	FALSE
DBVPG1701	BNK	Grape must	Wine	Must	Cihuri, Rioja, Spain	no	A	2	euploid	Euploid	homozygous	196	1. Wine/European	DBVPG collection (Benedetta Turchetti and Pietro Buzzini)	Peter	0.000200698	DBVPG1701	AA	hom	FALSE
DBVPG1708	BNL	Soil	Soil	Soil	Ultura, Sweden	no	A	2	euploid	Euploid	heterozygous	245	1. Wine/European	DBVPG collection (Benedetta Turchetti and Pietro Buzzini)	Peter	0.000492844	DBVPG1708	AA	hom	FALSE
DBVPG1711	BNM	Grape must	Wine	Must	Ygai, Rioja, Spain	no	A	2	euploid	Euploid	homozygous	215	1. Wine/European	DBVPG collection (Benedetta Turchetti and Pietro Buzzini)	Peter	0.000160035	DBVPG1711	AA	hom	FALSE
DBVPG1712	BNN	Grape must	Wine	Must	Pedrejon, Rioja, Spain	no	A	2	euploid	Euploid	homozygous	297	1. Wine/European	DBVPG collection (Benedetta Turchetti and Pietro Buzzini)	Peter	0.000158546	DBVPG1712	AA	hom	FALSE
DBVPG1714	BNP	Grape must	Wine	Must	Fuen Mayor, Rioja, Spain	no	A	2	euploid	Euploid	heterozygous	175	1. Wine/European	DBVPG collection (Benedetta Turchetti and Pietro Buzzini)	Peter	0.000756507	DBVPG1714	AA	hom	FALSE
DBVPG1719	BNQ	Grape must	Wine	Must	San Adrian, Rioja, Spain	no	A	2	euploid	Euploid	homozygous	238	1. Wine/European	DBVPG collection (Benedetta Turchetti and Pietro Buzzini)	Peter	0.000174317	DBVPG1719	AA	hom	FALSE
DBVPG1725	BNR	Grape must	Wine	Must	La Puebla de la Barca, Rioja, Spain	no	A	2	euploid	Euploid	homozygous	199	1. Wine/European	DBVPG collection (Benedetta Turchetti and Pietro Buzzini)	Peter	0.000204082	DBVPG1725	AA	hom	FALSE
DBVPG1772	BNT	Soil	Soil	Soil	Kuopio, Finland	no	A	2	euploid	Euploid	homozygous	213	1. Wine/European	DBVPG collection (Benedetta Turchetti and Pietro Buzzini)	Peter	0.000161656	DBVPG1772	AA	hom	FALSE
DBVPG1788_1b	ABQ	Soil	Soil	Soil	Finland	yes	A	1	euploid	Euploid	homozygous	202	1. Wine/European	Kruglyak Laboratory	1	0.000141975	DBVPG1788_1b	AA	hom	FALSE
DBVPG1790	BNV	Soil	Soil	Soil	Turku, Finland	no	A	2	euploid	Euploid	homozygous	257	1. Wine/European	DBVPG collection (Benedetta Turchetti and Pietro Buzzini)	Peter	0.000154037	DBVPG1790	AA	hom	FALSE
DBVPG1792	BPA	Soil	Soil	Soil	Viik, Helsinki, Finland	no	B	2	aneu;+1*8;	Gain	heterozygous	287	M. Mosaic	DBVPG collection (Benedetta Turchetti and Pietro Buzzini)	Peter	0.00533351	DBVPG1792	AB	het	FALSE
DBVPG1794_1b	ABR	Soil	Soil	Soil	Finland	yes	A	1	euploid	Euploid	homozygous	189	1. Wine/European	Kruglyak Laboratory	1	0.00013959	DBVPG1794_1b	AA	hom	FALSE
DBVPG1795	BPB	Grape must	Wine	Must	Illasi, Verona, Italy	no	A	2	euploid	Euploid	homozygous	368	1. Wine/European	DBVPG collection (Benedetta Turchetti and Pietro Buzzini)	Peter	0.000174592	DBVPG1795	AA	hom	FALSE
DBVPG1798	BPC	Grape must	Wine	Must	Sicily, Italy	no	A	2	euploid	Euploid	homozygous	249	1. Wine/European	DBVPG collection (Benedetta Turchetti and Pietro Buzzini)	Peter	0.000196057	DBVPG1798	AA	hom	FALSE
DBVPG1832	BPF	Fruit juice	Fruit	Fruit	NA	no	A	2	euploid	Euploid	heterozygous	258	1. Wine/European	DBVPG collection (Benedetta Turchetti and Pietro Buzzini)	Peter	0.00055574	DBVPG1832	AA	hom	FALSE
DBVPG1841	BPG	Red Tecc	Unknown	Unknown	Ethiopia	no	A	2	aneu;+1*1;	1only	homozygous	132	1. Wine/European	DBVPG collection (Benedetta Turchetti and Pietro Buzzini)	Peter	0.000196631	DBVPG1841	AA	hom	TRUE
DBVPG1843	BPH	White Tecc	Unknown	Unknown	Ethiopia	no	A	2	aneu;+1*1;	1only	homozygous	244	1. Wine/European	DBVPG collection (Benedetta Turchetti and Pietro Buzzini)	Peter	0.00020213	DBVPG1843	AA	hom	TRUE
DBVPG1848	BPI	Tecc	Unknown	Unknown	Ethiopia	no	B	2	aneu;+1*1;+1*12;	Gain	heterozygous	174	NA	DBVPG collection (Benedetta Turchetti and Pietro Buzzini)	Peter	0.00333881	DBVPG1848	AB	het	FALSE
DBVPG1861	BPK	River water	Water	Water	Rajamaki River, Finland	no	A	2	euploid	Euploid	heterozygous	241	1. Wine/European	DBVPG collection (Benedetta Turchetti and Pietro Buzzini)	Peter	0.000521677	DBVPG1861	AA	hom	FALSE
DBVPG1878	BPL	Grape must	Wine	Must	Piave, Italy	no	A	2	euploid	Euploid	heterozygous	258	1. Wine/European	DBVPG collection (Benedetta Turchetti and Pietro Buzzini)	Peter	0.000478363	DBVPG1878	AA	hom	FALSE
DBVPG1880	BPM	Grape must treated with pesticides	Wine	Must	Italy	no	A	2	euploid	Euploid	heterozygous	254	1. Wine/European	DBVPG collection (Benedetta Turchetti and Pietro Buzzini)	Peter	0.000425216	DBVPG1880	AA	hom	FALSE
DBVPG1895	BPN	Grape must treated with pesticides	Wine	Must	Italy	no	B	2	euploid	Euploid	heterozygous	218	NA	DBVPG collection (Benedetta Turchetti and Pietro Buzzini)	Peter	0.00307416	DBVPG1895	AB	het	FALSE
DBVPG1898	BPP	Grape must	Wine	Must	Pantelleria, Italy	no	A	2	aneu;+1*1;	1only	homozygous	265	1. Wine/European	DBVPG collection (Benedetta Turchetti and Pietro Buzzini)	Peter	0.000166417	DBVPG1898	AA	hom	TRUE
DBVPG1918	BPQ	Grape must	Wine	Must	Malta	no	A	2	euploid	Euploid	homozygous	180	1. Wine/European	DBVPG collection (Benedetta Turchetti and Pietro Buzzini)	Peter	0.000219604	DBVPG1918	AA	hom	FALSE
DBVPG1919	BPR	Caverns	Nature	Nature	Italy	no	A	3	euploid	Euploid	heterozygous	219	1. Wine/European	DBVPG collection (Benedetta Turchetti and Pietro Buzzini)	Peter	0.000669159	DBVPG1919	AA	hom	FALSE
DBVPG1960	BPT	Grape must	Wine	Must	Recioto, Verona, Italy	no	A	2	euploid	Euploid	heterozygous	255	1. Wine/European	DBVPG collection (Benedetta Turchetti and Pietro Buzzini)	Peter	0.000557716	DBVPG1960	AA	hom	FALSE
DBVPG1973	BLR	Grape must	Wine	Must	Greece	no	A	2	euploid	Euploid	heterozygous	249	1. Wine/European	DBVPG collection (Benedetta Turchetti and Pietro Buzzini)	Peter	0.000556168	DBVPG1973	AA	hom	FALSE
DBVPG1975	BLS	Wine	Wine	Wine	Greece	no	A	2	euploid	Euploid	heterozygous	403	1. Wine/European	DBVPG collection (Benedetta Turchetti and Pietro Buzzini)	Peter	0.0005535	DBVPG1975	AA	hom	FALSE
DBVPG1976	BPV	Wine	Wine	Wine	Slovakia	no	A	2	euploid	Euploid	homozygous	261	1. Wine/European	DBVPG collection (Benedetta Turchetti and Pietro Buzzini)	Peter	0.000177538	DBVPG1976	AA	hom	FALSE
DBVPG1978	CBG	Grape must	Wine	Must	Slovakia	no	A	2	euploid	Euploid	heterozygous	167	1. Wine/European	DBVPG collection (Benedetta Turchetti and Pietro Buzzini)	Peter	0.000719508	DBVPG1978	AA	hom	FALSE
DBVPG1984	BLT	Grape must	Wine	Must	Slovenia	no	A	2	euploid	Euploid	heterozygous	346	1. Wine/European	DBVPG collection (Benedetta Turchetti and Pietro Buzzini)	Peter	0.000498429	DBVPG1984	AA	hom	FALSE
DBVPG1994	BQA	Grapes	Wine	Fruit	Greece	no	A	2	euploid	Euploid	homozygous	277	1. Wine/European	DBVPG collection (Benedetta Turchetti and Pietro Buzzini)	Peter	0.000169016	DBVPG1994	AA	hom	FALSE
DBVPG2049	BQB	Lambrusco grape must	Wine	Must	Reggio Emilia, Italy	no	A	2	euploid	Euploid	heterozygous	178	1. Wine/European	DBVPG collection (Benedetta Turchetti and Pietro Buzzini)	Peter	0.000914996	DBVPG2049	AA	hom	FALSE
DBVPG2088	BQC	Cognac	Distillery	Distillery	Cognac, France	no	A	2	euploid	Euploid	homozygous	251	1. Wine/European	DBVPG collection (Benedetta Turchetti and Pietro Buzzini)	Peter	0.000154356	DBVPG2088	AA	hom	FALSE
DBVPG2166	BQE	Sagrantino wine	Wine	Wine	production zone of Sagrantino wine, Montefalco, Foligno, Italy	no	A	2	euploid	Euploid	heterozygous	186	1. Wine/European	DBVPG collection (Benedetta Turchetti and Pietro Buzzini)	Peter	0.00080455	DBVPG2166	AA	het	FALSE
DBVPG3022	BLV	Grape must	Wine	Must	Squinzano, Italy	no	A	2	euploid	Euploid	homozygous	235	1. Wine/European	DBVPG collection (Benedetta Turchetti and Pietro Buzzini)	Peter	0.000158882	DBVPG3022	AA	hom	FALSE
DBVPG3051	CBH	Grape must	Wine	Must	Israel	no	A	2	euploid	Euploid	heterozygous	95	1. Wine/European	DBVPG collection (Benedetta Turchetti and Pietro Buzzini)	Peter	0.000439991	DBVPG3051	AA	hom	FALSE
DBVPG3098	BQG	Grape must	Wine	Must	Calabria, Italy	no	A	2	euploid	Euploid	homozygous	279	1. Wine/European	DBVPG collection (Benedetta Turchetti and Pietro Buzzini)	Peter	0.00016074	DBVPG3098	AA	hom	FALSE
DBVPG3100	BQH	Grape must	Wine	Must	Toscana, Italy	no	A	2	euploid	Euploid	heterozygous	216	1. Wine/European	DBVPG collection (Benedetta Turchetti and Pietro Buzzini)	Peter	0.000771962	DBVPG3100	AA	het	FALSE
DBVPG3591_1b	ABS	Cocoa beans	Nature	Nature	NA	yes	A	1	euploid	Euploid	homozygous	297	1. Wine/European	DBVPG collection	1	0.000161288	DBVPG3591_1b	AA	hom	FALSE
DBVPG3924	BQI	Grape must	Wine	Must	Piave, Italy	no	A	2	euploid	Euploid	homozygous	187	1. Wine/European	DBVPG collection (Benedetta Turchetti and Pietro Buzzini)	Peter	0.000152813	DBVPG3924	AA	hom	FALSE
DBVPG4036	CBI	Grape must	Wine	Must	ex Yugoslavia	no	A	2	euploid	Euploid	homozygous	194	1. Wine/European	DBVPG collection (Benedetta Turchetti and Pietro Buzzini)	Peter	0.000195874	DBVPG4036	AA	hom	FALSE
DBVPG4162	BQM	Grape must	Wine	Must	Reggio Emilia, Italy	no	A	2	euploid	Euploid	heterozygous	199	1. Wine/European	DBVPG collection (Benedetta Turchetti and Pietro Buzzini)	Peter	0.000700648	DBVPG4162	AA	hom	FALSE
DBVPG4186	BQN	Wine	Wine	Wine	Slovenia	no	A	2	euploid	Euploid	homozygous	196	1. Wine/European	DBVPG collection (Benedetta Turchetti and Pietro Buzzini)	Peter	0.000195939	DBVPG4186	AA	hom	FALSE
DBVPG4297	BQP	Prosecco wine	Wine	Wine	Treviso, Italy	no	A	2	euploid	Euploid	homozygous	231	1. Wine/European	DBVPG collection (Benedetta Turchetti and Pietro Buzzini)	Peter	0.000201739	DBVPG4297	AA	hom	FALSE
DBVPG4317	BQQ	Fermenting refrigerated Grape must (5C ca)	Wine	Must	Bettona, Perugia, Italy	no	A	2	euploid	Euploid	homozygous	172	1. Wine/European	DBVPG collection (Benedetta Turchetti and Pietro Buzzini)	Peter	0.000206802	DBVPG4317	AA	hom	FALSE
DBVPG4381	BQR	Seawater	Water	Water	Italy	no	A	2	euploid	Euploid	heterozygous	209	1. Wine/European	DBVPG collection (Benedetta Turchetti and Pietro Buzzini)	Peter	0.000325489	DBVPG4381	AA	hom	FALSE
DBVPG4410	BQS	Wine	Wine	Wine	Italy	no	A	2	euploid	Euploid	heterozygous	239	1. Wine/European	DBVPG collection (Benedetta Turchetti and Pietro Buzzini)	Peter	0.000338876	DBVPG4410	AA	hom	FALSE
DBVPG4460	BQT	Wine	Wine	Wine	Jesi, Italy	no	A	2	euploid	Euploid	homozygous	251	1. Wine/European	DBVPG collection (Benedetta Turchetti and Pietro Buzzini)	Peter	0.000167618	DBVPG4460	AA	hom	FALSE
DBVPG4651	BRA	Surface of Tuber magnatum	Nature	Nature	Italy	no	A	2	euploid	Euploid	homozygous	297	1. Wine/European	DBVPG collection (Benedetta Turchetti and Pietro Buzzini)	Peter	0.000220335	DBVPG4651	AA	hom	FALSE
DBVPG4651_1b	ABT	Tuber magnatum	Nature	Nature	Italy	yes	A	1	euploid	Euploid	homozygous	209	1. Wine/European	DBVPG collection	1	0.000202992	DBVPG4651_1b	AA	hom	FALSE
DBVPG4686	BRB	Winery	Wine	Wine	Deruta, Perugia, Italy	no	B	2	euploid	Euploid	heterozygous	222	1. Wine/European	DBVPG collection (Benedetta Turchetti and Pietro Buzzini)	Peter	0.000755597	DBVPG4686	BB	hom	FALSE
DBVPG4695	BRC	Winery surface at the beginning of Vino Santo production, Lungarotti winery	Wine	Wine	Torgiano, Perugia, Italy	no	A	2	euploid	Euploid	homozygous	261	1. Wine/European	DBVPG collection (Benedetta Turchetti and Pietro Buzzini)	Peter	0.000214448	DBVPG4695	AA	hom	FALSE
DBVPG4902	BRD	Dried sausages under oil	Unknown	Unknown	Perugia, Italy	no	A	2	euploid	Euploid	heterozygous	296	1. Wine/European	DBVPG collection (Benedetta Turchetti and Pietro Buzzini)	Peter	0.000843326	DBVPG4902	AA	hom	FALSE
DBVPG4905	BRE	Fermenting grape must	Wine	Must	Marsciano, Perugia, Italy	no	A	2	euploid	Euploid	homozygous	291	1. Wine/European	DBVPG collection (Benedetta Turchetti and Pietro Buzzini)	Peter	0.000179883	DBVPG4905	AA	hom	FALSE
DBVPG5760	BRF	Wine fermenter	Wine	Wine	Production zone of Sagrantino wine, Montefalco, Foligno, Italy	no	B	2	euploid	Euploid	heterozygous	215	1. Wine/European	DBVPG collection (Benedetta Turchetti and Pietro Buzzini)	Peter	0.00100826	DBVPG5760	AB	het	FALSE
DBVPG5836	BRG	Soil close to plum tree, depth: 25 cm. Agricultural soil: presence of important vegetation, some fallen fruit (plum) rotting & insects. Average T (June): [max: 26.3C / min: 13.6C]. Precipitation (June): 17.4 mm.	Soil	Soil	District of Hamma Bouziane, Constantine, Algeria	no	B	3	euploid	Euploid	heterozygous	271	26. Asian fermentation	DBVPG collection (Benedetta Turchetti and Pietro Buzzini)	Peter	0.000657651	DBVPG5836	BB	hom	FALSE
DBVPG6044	AKI	Bili wine	Wine	Wine	West Africa	no	B	2	euploid	Euploid	homozygous	175	M. Mosaic	DBVPG collection (Benedetta Turchetti and Pietro Buzzini)	Peter	0.000316112	DBVPG6044	BB	hom	FALSE
DBVPG6223	BRH	Grape must	Wine	Must	Spain	no	A	2	euploid	Euploid	homozygous	321	1. Wine/European	DBVPG collection (Benedetta Turchetti and Pietro Buzzini)	Peter	0.000183956	DBVPG6223	AA	hom	FALSE
DBVPG6295	BSG	Grape must	Wine	Must	South Africa	no	A	2	euploid	Euploid	homozygous	246	1. Wine/European	DBVPG collection (Benedetta Turchetti and Pietro Buzzini)	Peter	0.000203987	DBVPG6295	AA	hom	FALSE
DBVPG6302	BRK	Alpechin (waste from olive oil production)	Industrial	Industrial	Spain	no	A	2	euploid	Euploid	homozygous	220	2. Alpechin	DBVPG collection (Benedetta Turchetti and Pietro Buzzini)	Peter	0.000323763	DBVPG6302	AA	hom	FALSE
DBVPG6350	BRL	UC Berkeley	Unknown	Unknown	USA	no	A	1	aneu;+1*11;	Gain	homozygous	184	M. Mosaic	DBVPG collection (Benedetta Turchetti and Pietro Buzzini)	Peter	0.000223089	DBVPG6350	AA	hom	FALSE
DBVPG6590	BRM	Alcohol production tank	Distillery	Distillery	Brazil	no	A	1	euploid	Euploid	homozygous	211	7. Mosaic beer	DBVPG collection (Benedetta Turchetti and Pietro Buzzini)	Peter	0.000256331	DBVPG6590	AA	hom	FALSE
DBVPG6693	BSI	Beer	Beer	Beer	Belgium	no	A	4	aneu;+1*1;+1*9;-1*14;	Both	heterozygous	259	11. Ale beer	DBVPG collection (Benedetta Turchetti and Pietro Buzzini)	Peter	0.00328932	DBVPG6693	AA	hom	FALSE
DBVPG6694	BRP	Artois Peterman beer	Beer	Beer	Belgium	no	A	4	aneu;+1*1;-1*3;	Both	heterozygous	302	11. Ale beer	DBVPG collection (Benedetta Turchetti and Pietro Buzzini)	Peter	0.0037674	DBVPG6694	AA	hom	FALSE
DBVPG6695	BRQ	Orval Trappist beer	Beer	Beer	Belgium	no	A	4	aneu;-1*1;-1*5;+2*9;-1*10;+1*13;	Both	heterozygous	331	11. Ale beer	DBVPG collection (Benedetta Turchetti and Pietro Buzzini)	Peter	0.0033494	DBVPG6695	AA	hom	FALSE
DBVPG6696	ANA	Banana wine	Wine	Wine	Burundi	no	B	2	aneu;+1*12;	Gain	heterozygous	247	M. Mosaic	DBVPG collection (Benedetta Turchetti and Pietro Buzzini)	Peter	0.000673639	DBVPG6696	BB	hom	FALSE
DBVPG6861	ABV	Poluted stream	Water	Water	Tijuca forest, Rio de Janeiro, Brazil	no	B	3	aneu;+1*1;+1*9;	Gain	heterozygous	241	8. Mixed origin	DBVPG collection	1	0.00541818	DBVPG6861	AB	het	FALSE
DBVPG6874	BRV	Human	Human, clinical	Human, clinical	USA	no	A	2	euploid	Euploid	heterozygous	277	M. Mosaic	DBVPG collection (Benedetta Turchetti and Pietro Buzzini)	Peter	0.0026271	DBVPG6874	AA	hom	FALSE
DBVPG6876	BSA	Winery	Wine	Wine	Frog's Leap Winery, California, USA	no	A	2	euploid	Euploid	homozygous	342	1. Wine/European	DBVPG collection (Benedetta Turchetti and Pietro Buzzini)	Peter	0.00022424	DBVPG6876	AA	hom	FALSE
DBVPG6877	BSB	Winery	Wine	Wine	Sterling Winery, California, USA	no	A	2	euploid	Euploid	homozygous	250	1. Wine/European	DBVPG collection (Benedetta Turchetti and Pietro Buzzini)	Peter	0.000166587	DBVPG6877	AA	hom	FALSE
DBVPG6878	BSC	Winery	Wine	Wine	Mondavi Winery, California, USA	no	A	2	euploid	Euploid	homozygous	236	1. Wine/European	DBVPG collection (Benedetta Turchetti and Pietro Buzzini)	Peter	0.000184321	DBVPG6878	AA	hom	FALSE
DBVPG6879	BSD	Winery	Wine	Wine	Newton Winery, California, USA	no	A	2	euploid	Euploid	homozygous	243	1. Wine/European	DBVPG collection (Benedetta Turchetti and Pietro Buzzini)	Peter	0.000166773	DBVPG6879	AA	hom	FALSE
DBVPG6880	BSE	Winery	Wine	Wine	Ridge Winery, California, USA	no	A	2	euploid	Euploid	homozygous	254	1. Wine/European	DBVPG collection (Benedetta Turchetti and Pietro Buzzini)	Peter	0.000186377	DBVPG6880	AA	hom	FALSE
DJ65	AVV	Palm wine	Palm wine	Palm wine	Yoboki, Djibouti	no	B	3	euploid	Euploid	heterozygous	307	13. African palm wine	Universit≈Ω de Lyon (Michel Aigle)	22	0.00210086	DJ65	BB	hom	FALSE
DJ66	BAA	Palm wine	Palm wine	Palm wine	Yoboki, Djibouti	no	B	3	euploid	Euploid	heterozygous	224	13. African palm wine	Universit≈Ω de Lyon (Michel Aigle)	22	0.001969	DJ66	BB	hom	FALSE
DJ68	BAB	Palm wine	Palm wine	Palm wine	Yoboki, Djibouti	no	B	3	euploid	Euploid	heterozygous	268	13. African palm wine	Universit≈Ω de Lyon (Michel Aigle)	22	0.00214798	DJ68	BB	hom	FALSE
DJ70	BAC	Palm wine	Palm wine	Palm wine	Yoboki, Djibouti	no	B	3	euploid	Euploid	heterozygous	296	13. African palm wine	Universit≈Ω de Lyon (Michel Aigle)	22	0.00209508	DJ70	BB	hom	FALSE
DJ71	BAD	Palm wine	Palm wine	Palm wine	Yoboki, Djibouti	no	B	3	euploid	Euploid	heterozygous	260	13. African palm wine	Universit≈Ω de Lyon (Michel Aigle)	22	0.00209563	DJ71	BB	hom	FALSE
DJ73	BAE	Palm wine	Palm wine	Palm wine	Yoboki, Djibouti	no	B	3	euploid	Euploid	heterozygous	264	13. African palm wine	Universit≈Ω de Lyon (Michel Aigle)	22	0.00211325	DJ73	BB	hom	FALSE
DJ74	BAF	Palm wine	Palm wine	Palm wine	Yoboki, Djibouti	no	B	2	euploid	Euploid	heterozygous	202	13. African palm wine	Universit≈Ω de Lyon (Michel Aigle)	22	0.00244034	DJ74	BB	het	FALSE
Dji2-2A(a)	CFA	Palm wine	Palm wine	Palm wine	Djibouti	no	B	2	euploid	Euploid	homozygous	277	13. African palm wine	State Research Institute of Genetics and Selection of Industrial Microorganisms (Naumov G.I.)	Peter	0.000263504	Dji2_2A_a_	BB	hom	FALSE
E1-6	CRK	Wine	Wine	Wine	Italy	no	A	2	euploid	Euploid	homozygous	241	1. Wine/European	University of Basilicata (Angela Capece and Patrizia Romano)	Peter	0.000215523	E1_6	AA	hom	FALSE
E4	AIM	NA	Wine	Unknown	Umbria, Italy	no	A	2	euploid	Euploid	heterozygous	217	1. Wine/European	NA	12	0.00116928	E4	AA	het	FALSE
EM14S01-3B	CEG	Soil	Soil	Soil	Taiwan	no	A	2	euploid	Euploid	homozygous	226	17. Taiwanese	State Research Institute of Genetics and Selection of Industrial Microorganisms (Naumov G.I.)	25	0.000281411	EM14S01_3B	AA	hom	FALSE
EM93_3	ACA	Rotting fig	Fruit	Fruit	California, USA	yes	A	1	euploid	Euploid	homozygous	230	M. Mosaic	Kruglyak Laboratory	1	0.00015241	EM93_3	AA	hom	FALSE
EN14S01	AMH	Soil	Soil	Soil	Sinyi, Nantou, Taiwan	no	A	2	euploid	Euploid	homozygous	228	17. Taiwanese	National Hsinchu University of Education (Ching-Fu Lee)	25	0.000269848	EN14S01	AA	hom	FALSE
ES2M03	AMF	Fruiting body of Russula sp.	Fruit	Fruit	Dongpu, Sinyi Township, Nantou, Taiwan	no	B	2	euploid	Euploid	homozygous	195	NA	National Hsinchu University of Education (Ching-Fu Lee)	25	0.00036154	ES2M03	BB	hom	FALSE
ES2M03-7A	CEH	Fruiting body of Russula sp.	Fruit	Fruit	Taiwan	no	B	2	euploid	Euploid	homozygous	250	NA	State Research Institute of Genetics and Selection of Industrial Microorganisms (Naumov G.I.)	Peter	0.000371852	ES2M03_7A	BB	hom	FALSE
ES4M07	AMD	Fruiting body of Geastrum sp.	Fruit	Fruit	Dongpu, Sinyi Township, Nantou, Taiwan	no	B	2	euploid	Euploid	homozygous	223	NA	National Hsinchu University of Education (Ching-Fu Lee)	25	0.000366197	ES4M07	BB	hom	FALSE
EXF-3387	BEP	Homemade apple vingar	Unknown	Unknown	Ljubljana, Slovenia	no	A	2	euploid	Euploid	heterozygous	236	1. Wine/European	University of Ljubljana, Biotech Facility dept. Biology Ljubljana, Slovenia (Gunde-Cimerman N.)	Peter	0.000533207	EXF_3387	AA	hom	FALSE
EXF-4126	BEQ	Dry wine-berry selection	Wine	Fruit	Ljubljana, Slovenia	no	A	2	euploid	Euploid	heterozygous	240	1. Wine/European	University of Ljubljana, Biotech Facility dept. Biology Ljubljana, Slovenia (Gunde-Cimerman N.)	Peter	0.00133165	EXF_4126	AA	het	FALSE
EXF-5042	BER	Straw broom sink cleaning after grape pressing	Wine	Wine	Slovenia	no	A	2	euploid	Euploid	heterozygous	251	1. Wine/European	University of Ljubljana, Biotech Facility dept. Biology Ljubljana, Slovenia (Gunde-Cimerman N.)	Peter	0.00034191	EXF_5042	AA	hom	FALSE
EXF-5046	BES	Grapes	Wine	Fruit	Slovenia	no	A	2	euploid	Euploid	heterozygous	238	1. Wine/European	University of Ljubljana, Biotech Facility dept. Biology Ljubljana, Slovenia (Gunde-Cimerman N.)	Peter	0.000353863	EXF_5046	AA	hom	FALSE
EXF-5247	BET	Seawater in harbour	Water	Water	Koper, Slovenia	no	A	2	euploid	Euploid	homozygous	236	1. Wine/European	University of Ljubljana, Biotech Facility dept. Biology Ljubljana, Slovenia (Gunde-Cimerman N.)	Peter	0.000201694	EXF_5247	AA	hom	FALSE
EXF-5248	BEV	Seawater in harbour	Water	Water	Koper, Slovenia	no	A	2	euploid	Euploid	homozygous	190	1. Wine/European	University of Ljubljana, Biotech Facility dept. Biology Ljubljana, Slovenia (Gunde-Cimerman N.)	Peter	0.000197881	EXF_5248	AA	hom	FALSE
EXF-5284	BFA	Soil below rotten apple	Soil	Soil	Slovenia	no	B	2	euploid	Euploid	homozygous	279	NA	University of Ljubljana, Biotech Facility dept. Biology Ljubljana, Slovenia (Gunde-Cimerman N.)	Peter	0.000345312	EXF_5284	BB	hom	FALSE
EXF-5287	BFB	Plum	Nature	Nature	Slovenia	no	A	2	euploid	Euploid	heterozygous	213	1. Wine/European	University of Ljubljana, Biotech Facility dept. Biology Ljubljana, Slovenia (Gunde-Cimerman N.)	Peter	0.000846735	EXF_5287	AA	het	FALSE
EXF-5295	BFC	Kefyr	Fermentation	Fermentation	Slovenia	no	A	2	euploid	Euploid	homozygous	231	1. Wine/European	University of Ljubljana, Biotech Facility dept. Biology Ljubljana, Slovenia (Gunde-Cimerman N.)	Peter	0.000171168	EXF_5295	AA	hom	FALSE
EXF-5297	BFD	Mashed pears	Fruit	Fruit	Slovenia	no	A	2	euploid	Euploid	homozygous	270	1. Wine/European	University of Ljubljana, Biotech Facility dept. Biology Ljubljana, Slovenia (Gunde-Cimerman N.)	Peter	0.000268933	EXF_5297	AA	hom	FALSE
EXF-5734	BFE	Spoiled gooseberry juice	Industrial	Industrial	NA	no	B	4	aneu;-1*14;	Loss	heterozygous	270	8. Mixed origin	University of Ljubljana, Biotech Facility dept. Biology Ljubljana, Slovenia (Gunde-Cimerman N.)	Peter	0.00625913	EXF_5734	AB	het	FALSE
EXF-5869	BFG	Rotten wood	Nature	Nature	NA	no	B	4	euploid	Euploid	heterozygous	199	8. Mixed origin	University of Ljubljana, Biotech Facility dept. Biology Ljubljana, Slovenia (Gunde-Cimerman N.)	Peter	0.006249	EXF_5869	AB	het	FALSE
EXF-5871	BFH	Homemade cheese	Dairy	Dairy	Slovenia	no	A	2	euploid	Euploid	heterozygous	258	5. French dairy	University of Ljubljana, Biotech Facility dept. Biology Ljubljana, Slovenia (Gunde-Cimerman N.)	Peter	0.00251076	EXF_5871	AA	hom	FALSE
EXF-6761	BFK	Quercus cerris	Tree	Tree	Slovenia	no	A	2	euploid	Euploid	homozygous	296	1. Wine/European	University of Ljubljana, Biotech Facility dept. Biology Ljubljana, Slovenia (Gunde-Cimerman N.)	Peter	0.00018591	EXF_6761	AA	hom	FALSE
EXF-6780	BFL	Quercus petrea	Tree	Tree	Slovenia	no	B	2	euploid	Euploid	homozygous	300	NA	University of Ljubljana, Biotech Facility dept. Biology Ljubljana, Slovenia (Gunde-Cimerman N.)	Peter	0.000343757	EXF_6780	BB	hom	FALSE
EXF-6835	BFM	Petrol station, oil contaminated asphalt	Industrial	Industrial	Slovenia	no	B	4	aneu;-1*13;-1*16;	Loss	heterozygous	77	8. Mixed origin	University of Ljubljana, Biotech Facility dept. Biology Ljubljana, Slovenia (Gunde-Cimerman N.)	Peter	0.00623114	EXF_6835	AB	het	FALSE
EXF-7145	BFN	Quercus robur	Tree	Tree	Serbia	no	A	2	aneu;+1*10;	Gain	heterozygous	49	5. French dairy	University of Ljubljana, Biotech Facility dept. Biology Ljubljana, Slovenia (Gunde-Cimerman N.)	Peter	0.00302961	EXF-7145	AA	het	FALSE
EXF-7197	BFP	Quercus sp.	Tree	Tree	Montenegro	no	A	2	euploid	Euploid	homozygous	231	4. Mediterranean oak	University of Ljubljana, Biotech Facility dept. Biology Ljubljana, Slovenia (Gunde-Cimerman N.)	Peter	0.000283428	EXF_7197	AA	hom	FALSE
FIMA_3	CRD	Wine	Wine	Wine	Italy	no	A	2	euploid	Euploid	homozygous	137	1. Wine/European	University of Basilicata (Angela Capece and Patrizia Romano)	Peter	0.000161614	FIMA_3	AA	het	FALSE
FTPW3	CPT	Palm wine	Palm wine	Palm wine	Burkina Faso	no	B	2	aneu;+1*9;	Gain	heterozygous	207	13. African palm wine	Universit≈Ω de Lyon (Michel Aigle)	22	0.000817314	FTPW3	BB	hom	FALSE
FTPW32	CQA	Palm wine	Palm wine	Palm wine	Burkina Faso	no	B	2	euploid	Euploid	heterozygous	246	13. African palm wine	Universit≈Ω de Lyon (Michel Aigle)	22	0.000410623	FTPW32	BB	hom	FALSE
FTPW35	CQB	Palm wine	Palm wine	Palm wine	Burkina Faso	no	B	2	euploid	Euploid	heterozygous	264	13. African palm wine	Universit≈Ω de Lyon (Michel Aigle)	22	0.000766848	FTPW35	BB	hom	FALSE
FTPW4	CPS	Palm wine	Palm wine	Palm wine	Burkina Faso	no	B	3	euploid	Euploid	heterozygous	219	13. African palm wine	Universit≈Ω de Lyon (Michel Aigle)	22	0.00211337	FTPW4	BB	het	FALSE
GE14S01-7B	CEI	Soil	Soil	Soil	Taiwan	no	A	2	euploid	Euploid	homozygous	193	17. Taiwanese	State Research Institute of Genetics and Selection of Industrial Microorganisms (Naumov G.I.)	25	0.000286812	GE14S01_7B	AA	hom	FALSE
HE001	BCB	Human feces	Human	Human	French Guiana	no	A	2	euploid	Euploid	heterozygous	218	10. French Guiana human	Institut Pasteur (Christophe d'Enfert and Marie-Elisabeth Bougnoux)	20	0.00112888	HE001	AA	het	FALSE
HE004	BCC	Human feces	Human	Human	French Guiana	no	A	2	euploid	Euploid	heterozygous	112	10. French Guiana human	Institut Pasteur (Christophe d'Enfert and Marie-Elisabeth Bougnoux)	20	0.00114811	HE004	AA	het	FALSE
HE005	BCD	Human feces	Human	Human	French Guiana	no	A	2	euploid	Euploid	heterozygous	233	10. French Guiana human	Institut Pasteur (Christophe d'Enfert and Marie-Elisabeth Bougnoux)	20	0.00120112	HE005	AA	hom	FALSE
HE006	BCE	Human feces	Human	Human	French Guiana	no	A	2	euploid	Euploid	heterozygous	190	10. French Guiana human	Institut Pasteur (Christophe d'Enfert and Marie-Elisabeth Bougnoux)	20	0.000965776	HE006	AA	het	FALSE
HE007	BCF	Human feces	Human	Human	French Guiana	no	A	2	euploid	Euploid	heterozygous	224	10. French Guiana human	Institut Pasteur (Christophe d'Enfert and Marie-Elisabeth Bougnoux)	20	0.000986312	HE007	AA	hom	FALSE
HE008	BCG	Human feces	Human	Human	French Guiana	no	A	2	euploid	Euploid	heterozygous	230	10. French Guiana human	Institut Pasteur (Christophe d'Enfert and Marie-Elisabeth Bougnoux)	20	0.00104449	HE008	AA	hom	FALSE
HE009	BCH	Human feces	Human	Human	French Guiana	no	A	2	euploid	Euploid	heterozygous	242	10. French Guiana human	Institut Pasteur (Christophe d'Enfert and Marie-Elisabeth Bougnoux)	20	0.000986814	HE009	AA	het	FALSE
HE010	BCI	Human feces	Human	Human	French Guiana	no	A	2	aneu;+1*4;	Gain	heterozygous	217	10. French Guiana human	Institut Pasteur (Christophe d'Enfert and Marie-Elisabeth Bougnoux)	20	0.00111648	HE010	AA	hom	FALSE
HE011	BCK	Human feces	Human	Human	French Guiana	no	A	2	euploid	Euploid	heterozygous	238	10. French Guiana human	Institut Pasteur (Christophe d'Enfert and Marie-Elisabeth Bougnoux)	20	0.00119781	HE011	AA	hom	FALSE
HE012	BCL	Human feces	Human	Human	French Guiana	no	A	2	euploid	Euploid	heterozygous	230	10. French Guiana human	Institut Pasteur (Christophe d'Enfert and Marie-Elisabeth Bougnoux)	20	0.000926799	HE012	AA	het	FALSE
HE013	BCM	Human feces	Human	Human	French Guiana	no	A	2	euploid	Euploid	heterozygous	207	10. French Guiana human	Institut Pasteur (Christophe d'Enfert and Marie-Elisabeth Bougnoux)	20	0.000915778	HE013	AA	hom	FALSE
HE015	BCN	Human feces	Human	Human	French Guiana	no	A	1	euploid	Euploid	homozygous	213	10. French Guiana human	Institut Pasteur (Christophe d'Enfert and Marie-Elisabeth Bougnoux)	20	0.00032524	HE015	AA	hom	FALSE
HE016	BCP	Human feces	Human	Human	French Guiana	no	A	2	euploid	Euploid	heterozygous	192	10. French Guiana human	Institut Pasteur (Christophe d'Enfert and Marie-Elisabeth Bougnoux)	20	0.000988744	HE016	AA	hom	FALSE
HE020	BCQ	Human	Human	Human	French Guiana	no	A	2	euploid	Euploid	heterozygous	226	10. French Guiana human	Institut Pasteur (Christophe d'Enfert and Marie-Elisabeth Bougnoux)	20	0.000951437	HE020	AA	hom	FALSE
HN10	BAM	Rotten wood	Nature	Nature	Wuzhi Mountain, Hainan province, China	no	B	2	euploid	Euploid	homozygous	221	14. CHNIII	Chinese Academy of Sciences (Feng-Yan Bai)	24	0.000388343	HN10	BB	hom	FALSE
HN15	BAN	Rotten wood	Nature	Nature	Wuzhi Mountain, Hainan province, China	no	B	2	euploid	Euploid	homozygous	225	20. CHN V	Chinese Academy of Sciences (Feng-Yan Bai)	24	0.000352571	HN15	BB	hom	FALSE
HN16	BAP	Soil	Soil	Soil	Wuzhi Mountain, Hainan province, China	no	B	2	euploid	Euploid	homozygous	223	20. CHN V	Chinese Academy of Sciences (Feng-Yan Bai)	24	0.00033484	HN16	BB	hom	FALSE
HN19	BAQ	Bark from tree in Fagaceae family	Tree	Tree	Wuzhi Mountain, Hainan province, China	no	B	2	euploid	Euploid	homozygous	236	14. CHNIII	Chinese Academy of Sciences (Feng-Yan Bai)	24	0.000318323	HN19	BB	hom	FALSE
HN6	BAL	Rotten wood	Nature	Nature	Bawangling Mountain, Hainan province, China	no	A	2	euploid	Euploid	homozygous	237	16. CHNI	Chinese Academy of Sciences (Feng-Yan Bai)	24	0.00028318	HN6	AA	hom	FALSE
ho_SB	CFB	Wine	Wine	Wine	Bordeaux	no	A	2	aneu;+2*9;	Gain	homozygous	260	1. Wine/European	BioLaffort ISVV EA Enology Universit≈Ω de Bordeaux, France (Marullo P.)	Peter	0.000204999	ho_SB	AA	hom	FALSE
I14_1b	ACS	Vineyard soil	Wine	Vineyard	Italy	yes	A	1	euploid	Euploid	homozygous	238	M. Mosaic	Kruglyak Laboratory	1	0.000339089	I14_1b	AA	hom	FALSE
IFO_0289:4-3(b)	CEV	Moromi of Chinese wine kaoliangchiu	Distillery	Distillery	China	yes	B	1	euploid	Euploid	homozygous	564	26. Asian fermentation	State Research Institute of Genetics and Selection of Industrial Microorganisms (Naumov G.I.)	Peter	0.000222827	IFO_0289_4_3_b	BB	hom	FALSE
IFO_0877:6-1	CCP	Quercus sp.	Tree	Tree	Japan	no	B	2	euploid	Euploid	homozygous	205	NA	State Research Institute of Genetics and Selection of Industrial Microorganisms (Naumov G.I.)	Peter	0.000339987	IFO_0877_6_1	BB	hom	FALSE
IL_01_b	ADD	Soil	Soil	Soil	Illinois, USA	yes	A	1	euploid	Euploid	homozygous	225	1. Wine/European	Kruglyak Laboratory	1	0.00018094	IL_01_b	AA	hom	FALSE
IMB-53	BBL	Beetle Mimela aurata (Coleoptera, Rutelinae)	Insect	Insect	Platanus orientalis forest, in Belasista Mountain, near Kamena Village in Bulgaria	no	B	2	aneu;+1*5;+1*8;+1*9;+1*12;+1*14;	Gain	homozygous	296	M. Mosaic	Bulgarian Academy of Science (Dilnora Gouliamova)	Peter	0.000289385	IMB_53	BB	hom	FALSE
IY_03-5-26-5-1-1_(1)	AMC	Chauliodes pectinicornis (female) - Corydalidae	Insect	Insect	Louisiana, USA	no	B	2	euploid	Euploid	homozygous	212	NA	Louisiana State University (Meredith Blackwell)	26	0.000348064	IY_03_5_26_5_1_1_1	BB	hom	FALSE
IY_03-5-30-1-1-1_(1)	AMB	Chauliodes pectinicornis (male) - Corydalidae	Insect	Insect	Louisiana, USA	no	B	2	euploid	Euploid	homozygous	208	NA	Louisiana State University (Meredith Blackwell)	26	0.000355087	IY_03_5_30_1_1_1_1	BB	hom	FALSE
JCM_2985-4B	CEK	Fermented fish	Fermentation	Fermentation	Tailand	no	B	2	euploid	Euploid	homozygous	235	26. Asian fermentation	State Research Institute of Genetics and Selection of Industrial Microorganisms (Naumov G.I.)	Peter	0.000247815	JCM_2985_4B	BB	hom	FALSE
JCM_3529-7B	CEL	Fermented shrimp	Fermentation	Fermentation	Tailand	no	B	2	euploid	Euploid	homozygous	292	26. Asian fermentation	State Research Institute of Genetics and Selection of Industrial Microorganisms (Naumov G.I.)	Peter	0.000261552	JCM_3529_7B	BB	hom	FALSE
K1_1	ADN	Sake	Sake	Sake	Japan	yes	B	1	euploid	Euploid	homozygous	207	25. Sake	Kruglyak Laboratory	1	0.000255495	K1_1	BB	hom	FALSE
K10	CLL	Sake	Sake	Sake	Japan	no	B	2	euploid	Euploid	heterozygous	188	25. Sake	Washington University School of Medicine (Justin C Fay)	5	0.000389779	K10	BB	hom	FALSE
K12	AKL	Sake	Sake	Sake	Japan	no	B	2	euploid	Euploid	heterozygous	242	26. Asian fermentation	Washington University School of Medicine (Justin C Fay)	Peter	0.00135926	K12	BB	hom	FALSE
K12_2	ADQ	Sake (shochu)	Sake	Sake	Japan	yes	B	1	euploid	Euploid	homozygous	208	25. Sake	Kruglyak Laboratory	1	0.000252057	K12_2	BB	hom	FALSE
K13	CLM	Sake	Sake	Sake	Japan	no	B	2	aneu;+1*3;	Gain	heterozygous	277	25. Sake	Washington University School of Medicine (Justin C Fay)	5	0.000488462	K13	BB	hom	FALSE
K14	CLN	Sake	Sake	Sake	Japan	no	B	2	euploid	Euploid	homozygous	207	25. Sake	Washington University School of Medicine (Justin C Fay)	5	0.000315061	K14	BB	hom	FALSE
K15	CLP	Sake	Sake	Sake	Japan	no	B	2	euploid	Euploid	heterozygous	220	25. Sake	Washington University School of Medicine (Justin C Fay)	5	0.000365957	K15	BB	hom	FALSE
K5	CLI	Sake	Sake	Sake	Japan	no	B	2	euploid	Euploid	heterozygous	241	25. Sake	Washington University School of Medicine (Justin C Fay)	5	0.000586802	K5	BB	hom	FALSE
K9	CLK	Sake	Sake	Sake	Japan	no	B	2	aneu;+2*9;	Gain	heterozygous	275	25. Sake	Washington University School of Medicine (Justin C Fay)	5	0.000401017	K9	BB	het	FALSE
Ksc2-2B	CCQ	Tree exudate	Tree	Tree	Japan	no	B	2	euploid	Euploid	homozygous	240	18. Far East Asia	State Research Institute of Genetics and Selection of Industrial Microorganisms (Naumov G.I.)	Peter	0.000381194	Ksc2_2B	BB	hom	FALSE
Ksc40-8A	CCR	Tree exudate	Tree	Tree	Japan	no	A	2	euploid	Euploid	homozygous	247	18. Far East Asia	State Research Institute of Genetics and Selection of Industrial Microorganisms (Naumov G.I.)	Peter	0.000335415	Ksc40_8A	AA	hom	FALSE
Ksc73-2D	CCS	Tree exudate	Tree	Tree	Japan	no	B	2	euploid	Euploid	homozygous	258	18. Far East Asia	State Research Institute of Genetics and Selection of Industrial Microorganisms (Naumov G.I.)	Peter	0.000367295	Ksc73_2D	BB	hom	FALSE
L-1183	BSP	Wine	Wine	Wine	Uruguay	no	A	2	euploid	Euploid	homozygous	143	1. Wine/European	Pontificia Universidad Catolica de Chile (Claudio Martinez)	Peter	0.000212587	L_1183	AA	hom	FALSE
L-1191	ANQ	Wine	Wine	Wine	Valle de Ica, Peru	no	A	2	euploid	Euploid	homozygous	192	1. Wine/European	Universidad de Santiago de Chile (Francisco Cubillos) and Pontificia Universidad Catolica de Chile (Claudio Martinez)	11	0.000161533	L_1191	AA	hom	FALSE
L-1194	AVK	Wine	Wine	Wine	Valle de Ica, Peru	no	A	2	euploid	Euploid	homozygous	242	1. Wine/European	Universidad de Santiago de Chile (Francisco Cubillos) and Pontificia Universidad Catolica de Chile (Claudio Martinez)	11	0.000157068	L_1194	AA	hom	FALSE
L-1198	BTP	Heterozygote, 12% Sporulation Efficiency	Wine	Unknown	Valle de Ica, Peru	no	A	2	euploid	Euploid	heterozygous	221	1. Wine/European	Universidad de Santiago de Chile (Francisco Cubillos) and Pontificia Universidad Catolica de Chile (Claudio Martinez)	11	0.00165196	L_1198	AA	het	FALSE
L-1201	BTR	Heterozygote, 12% Sporulation Efficiency	Wine	Unknown	Valle de Ica, Peru	no	A	2	euploid	Euploid	heterozygous	148	1. Wine/European	Universidad de Santiago de Chile (Francisco Cubillos) and Pontificia Universidad Catolica de Chile (Claudio Martinez)	11	0.00176273	L_1201	AA	het	FALSE
L-304	BTL	Wine	Wine	Wine	Chile	no	A	2	euploid	Euploid	homozygous	210	1. Wine/European	Universidad de Santiago de Chile (Francisco Cubillos) and Pontificia Universidad Catolica de Chile (Claudio Martinez)	Peter	0.000169579	L_304	AA	hom	FALSE
L-319	CRH	Wine	Wine	Wine	Chile	no	A	2	euploid	Euploid	heterozygous	228	1. Wine/European	Universidad de Santiago de Chile (Francisco Cubillos) and Pontificia Universidad Catolica de Chile (Claudio Martinez)	Peter	0.0005522	L_319	AA	hom	FALSE
L-475	BTN	Wine	Wine	Wine	Chile	no	A	2	euploid	Euploid	homozygous	193	1. Wine/European	Universidad de Santiago de Chile (Francisco Cubillos) and Pontificia Universidad Catolica de Chile (Claudio Martinez)	Peter	0.000176658	L_475	AA	hom	FALSE
L-846	CRG	Wine	Wine	Wine	Chile	no	A	2	euploid	Euploid	heterozygous	213	1. Wine/European	Pontificia Universidad Catolica de Chile (Claudio Martinez)	Peter	0.000659257	L_846	AA	hom	FALSE
L-958	BSR	Wine	Wine	Wine	Mendoza area, Argentina	no	A	2	euploid	Euploid	heterozygous	151	1. Wine/European	Pontificia Universidad Catolica de Chile (Claudio Martinez)	Peter	0.00181291	L_958	AA	het	FALSE
L-960	BSS	Wine	Wine	Wine	Mendoza area, Argentina	no	A	2	euploid	Euploid	heterozygous	188	1. Wine/European	Pontificia Universidad Catolica de Chile (Claudio Martinez)	Peter	0.00185279	L_960	AA	het	FALSE
L-962	BST	Wine	Wine	Wine	Mendoza area, Argentina	no	A	2	euploid	Euploid	homozygous	223	1. Wine/European	Pontificia Universidad Catolica de Chile (Claudio Martinez)	Peter	0.000196459	L_962	AA	hom	FALSE
L-982	CQT	Wine	Wine	Wine	Argentina	no	A	2	euploid	Euploid	homozygous	292	1. Wine/European	Pontificia Universidad Catolica de Chile (Claudio Martinez)	Peter	0.000213904	L_982	AA	hom	FALSE
L1528	SACE_GAP	Wine	Wine	Wine	Chile	no	A	2	euploid	Euploid	homozygous	19	1. Wine/European	Universidad de Santiago de Chile (Francisco Cubillos) and Pontificia Universidad Catolica de Chile (Claudio Martinez)	6	7.96e-05	L1528	AA	hom	FALSE
LCBG-3D2	CPM	Agave spp. fermentation during rustic mezcal production	Distillery	Distillery	Tamaulipas, Mexico	no	A	2	euploid	Euploid	heterozygous	234	9. Mexican agave	Instituto Polit≈Ωcnico Nacional - Centro de Biotecnolog‚Äôa Gen‚Äîmica (Claudia Patricia Larralde Corona)	19	0.00214335	LCBG_3D2	AA	hom	FALSE
LCBG-3D4	CPQ	Agave spp. fermentation during rustic mezcal production	Distillery	Distillery	Tamaulipas, Mexico	no	A	2	aneu;+1*11;	Gain	heterozygous	195	9. Mexican agave	Instituto Polit≈Ωcnico Nacional - Centro de Biotecnolog‚Äôa Gen‚Äîmica (Claudia Patricia Larralde Corona)	Peter	0.00314371	LCBG_3D4	AA	hom	FALSE
LCBG-3D6	CPI	Agave spp. fermentation during rustic mezcal production	Distillery	Distillery	Tamaulipas, Mexico	no	A	2	euploid	Euploid	heterozygous	252	9. Mexican agave	Instituto Polit≈Ωcnico Nacional - Centro de Biotecnolog‚Äôa Gen‚Äîmica (Claudia Patricia Larralde Corona)	19	0.00254986	LCBG_3D6	AA	hom	FALSE
LCBG-3Y3	CPN	Agave spp. fermentation during rustic mezcal production	Distillery	Distillery	Tamaulipas, Mexico	no	A	2	euploid	Euploid	heterozygous	183	9. Mexican agave	Instituto Polit≈Ωcnico Nacional - Centro de Biotecnolog‚Äôa Gen‚Äîmica (Claudia Patricia Larralde Corona)	19	0.00383642	LCBG_3Y3	AA	hom	FALSE
LCBG-3Y8	CPR	Agave spp. fermentation during rustic mezcal production	Distillery	Distillery	Tamaulipas, Mexico	no	A	2	aneu;+1*12;	Gain	heterozygous	211	9. Mexican agave	Instituto Polit≈Ωcnico Nacional - Centro de Biotecnolog‚Äôa Gen‚Äîmica (Claudia Patricia Larralde Corona)	19	0.00395484	LCBG_3Y8	AA	hom	FALSE
LCBG-4Y3	CPL	Agave spp. fermentation during rustic mezcal production	Distillery	Distillery	Tamaulipas, Mexico	no	A	2	euploid	Euploid	heterozygous	248	9. Mexican agave	Instituto Polit≈Ωcnico Nacional - Centro de Biotecnolog‚Äôa Gen‚Äîmica (Claudia Patricia Larralde Corona)	Peter	0.00217619	LCBG_4Y3	AA	hom	FALSE
LCBG-Mosca3	CPK	Agave spp. fermentation during rustic mezcal production	Distillery	Distillery	Tamaulipas, Mexico	no	A	2	euploid	Euploid	heterozygous	131	9. Mexican agave	Instituto Polit≈Ωcnico Nacional - Centro de Biotecnolog‚Äôa Gen‚Äîmica (Claudia Patricia Larralde Corona)	Peter	0.00215459	LCBG_Mosca3	AA	hom	FALSE
Lib39	CGT	Fermenting grape must (white wine)	Wine	Must	Lebanon	no	A	2	euploid	Euploid	homozygous	264	1. Wine/European	INRA Gringnon, France (Nguyen H.V.)	Peter	0.000191591	Lib39	AA	hom	FALSE
Lib51	CGV	Fermenting grape must (sweet wine)	Wine	Must	Lebanon	no	A	2	euploid	Euploid	heterozygous	187	1. Wine/European	INRA Gringnon, France (Nguyen H.V.)	Peter	0.00050471	Lib51	AA	hom	FALSE
Lib52	CHA	Fermenting grape must (sweet wine)	Wine	Must	Lebanon	no	A	2	euploid	Euploid	homozygous	249	1. Wine/European	INRA Gringnon, France (Nguyen H.V.)	Peter	0.000155585	Lib52	AA	hom	FALSE
Lib54	CHB	Fermenting grape must (white wine)	Wine	Must	Lebanon	no	A	2	euploid	Euploid	heterozygous	246	1. Wine/European	INRA Gringnon, France (Nguyen H.V.)	Peter	0.00067562	Lib54	AA	hom	FALSE
Lib61	CHC	Fermenting grape must (red wine)	Wine	Must	Lebanon	no	A	2	euploid	Euploid	heterozygous	301	1. Wine/European	INRA Gringnon, France (Nguyen H.V.)	Peter	0.000444723	Lib61	AA	hom	FALSE
Lib70	CHD	Fermenting grape must (white wine)	Wine	Must	Lebanon	no	A	2	euploid	Euploid	heterozygous	214	1. Wine/European	INRA Gringnon, France (Nguyen H.V.)	Peter	0.00102806	Lib70	AA	het	FALSE
Lib71	CHE	Fermenting grape must (rose wine)	Wine	Must	Lebanon	no	A	2	euploid	Euploid	heterozygous	202	1. Wine/European	INRA Gringnon, France (Nguyen H.V.)	Peter	0.00066198	Lib71	AA	hom	FALSE
Lib73	CHF	Fermenting grape must (red wine)	Wine	Must	Lebanon	no	A	2	euploid	Euploid	heterozygous	210	1. Wine/European	INRA Gringnon, France (Nguyen H.V.)	Peter	0.00165821	Lib73	AA	hom	FALSE
Lx2	CGK	Unknown	Unknown	Unknown	Dong Thap, South Vietnam	no	B	2	euploid	Euploid	heterozygous	253	26. Asian fermentation	INRA Gringnon, France (Nguyen H.V.)	Peter	0.00074676	Lx2	BB	hom	FALSE
M.14.1	BTV	Cacha¬ça	Distillery	Distillery	Brazil	no	A	2	euploid	Euploid	heterozygous	214	3. Brazilian bioethanol	IBB-Unesp (Ana Teresa B. F. Antonangelo )	13	0.00228073	M_14_1	AA	hom	FALSE
M.9.1	BTT	Cacha¬ça	Distillery	Distillery	Brazil	no	A	2	euploid	Euploid	heterozygous	188	3. Brazilian bioethanol	IBB-Unesp (Ana Teresa B. F. Antonangelo )	13	0.00241474	M_9_1	AA	het	FALSE
M1	ASR	Vineyard	Wine	Vineyard	Italy	no	A	2	euploid	Euploid	heterozygous	251	1. Wine/European	Washington University School of Medicine (Justin C Fay)	5	0.00159663	M1	AA	het	FALSE
M1.1	APH	Cacha¬ça, Muller Industrial	Distillery	Distillery	Pirassununga, Sao Paulo, Brazil	no	A	2	euploid	Euploid	heterozygous	207	3. Brazilian bioethanol	IBB-Unesp (Ana Teresa B. F. Antonangelo )	13	0.00212099	M1_1	AA	hom	FALSE
M22_1b	ADR	Vineyard	Wine	Vineyard	Italy	yes	A	1	euploid	Euploid	homozygous	226	1. Wine/European	Kruglyak Laboratory	1	0.000164837	M22_1b	AA	hom	FALSE
M5	ASS	Vineyard	Wine	Vineyard	Italy	no	A	2	euploid	Euploid	homozygous	204	1. Wine/European	Washington University School of Medicine (Justin C Fay)	5	0.000241691	M5	AA	hom	FALSE
M57	BSL	Wine	Wine	Wine	Italy	no	A	2	euploid	Euploid	heterozygous	217	1. Wine/European	University of Florence (Duccio Cavalieri)	8	0.00110655	M57	AA	het	FALSE
M6	AST	Vineyard	Wine	Vineyard	Italy	no	A	2	euploid	Euploid	heterozygous	177	M. Mosaic	Washington University School of Medicine (Justin C Fay)	5	0.00129588	M6	AA	hom	FALSE
M9	ASV	Vineyard	Wine	Vineyard	Italy	no	A	2	aneu;+1*9;	Gain	heterozygous	181	M. Mosaic	Washington University School of Medicine (Justin C Fay)	5	0.00219674	M9	AA	hom	FALSE
MAJ_A	BDM	Plant material	Nature	Nature	Majunga, Madagascar	no	B	2	euploid	Euploid	heterozygous	204	M. Mosaic	National Collection of Yeast Cultures (NCYC)(Stephen A James and Ian Roberts)	Peter	0.00235046	MAJ_A	BB	het	FALSE
MAJ_G	BDN	Plant material	Nature	Nature	Majunga, Madagascar	no	A	2	euploid	Euploid	heterozygous	200	6. African beer	National Collection of Yeast Cultures (NCYC)(Stephen A James and Ian Roberts)	Peter	0.000586379	MAJ_G	AA	hom	FALSE
malade 1124/150017	CIV	Feces (therapy isolate)	Human, clinical	Human, clinical	Paris, France, H2	no	A	2	euploid	Euploid	heterozygous	229	1. Wine/European	Inserm Universit≈Ω P. M. Curie, Paris, France (Hennequin C.)	Peter	0.000347649	CLI_8	AA	hom	FALSE
malade 139287/11_2_1	CKC	Blood (therapy isolate)	Human, clinical	Human, clinical	Paris, France, H2	no	A	2	euploid	Euploid	heterozygous	163	1. Wine/European	Inserm Universit≈Ω P. M. Curie, Paris, France (Hennequin C.)	Peter	0.000335424	CLI_11	AA	hom	FALSE
malade 141076/11210	CKE	Feces (therapy isolate)	Human, clinical	Human, clinical	Paris, France, H2	no	A	2	euploid	Euploid	heterozygous	205	1. Wine/European	Inserm Universit≈Ω P. M. Curie, Paris, France (Hennequin C.)	Peter	0.000333392	CLI_13	AA	hom	FALSE
malade 150865/1122	CKF	Feces (therapy isolate)	Human, clinical	Human, clinical	Paris, France, H2	no	A	2	euploid	Euploid	heterozygous	163	1. Wine/European	Inserm Universit≈Ω P. M. Curie, Paris, France (Hennequin C.)	Peter	0.000320525	CLI_14	AA	hom	FALSE
malade 3285/11-2-4	CKA	Bronchoalveolar lavage (therapy isolate)	Human, clinical	Human, clinical	Paris, France, H3	no	B	2	euploid	Euploid	heterozygous	183	M. Mosaic	Inserm Universit≈Ω P. M. Curie, Paris, France (Hennequin C.)	Peter	0.00261646	CLI_9	BB	hom	FALSE
malade 459 Labaume	CIT	Blood (therapy isolate)	Human, clinical	Human, clinical	Paris, France, H1	no	A	2	euploid	Euploid	heterozygous	186	1. Wine/European	Inserm Universit≈Ω P. M. Curie, Paris, France (Hennequin C.)	Peter	0.000314058	CLI_7	AA	hom	FALSE
malade 6441	CIR	Blood (therapy isolate)	Human, clinical	Human, clinical	Paris, France, H6	no	A	2	euploid	Euploid	heterozygous	179	1. Wine/European	Inserm Universit≈Ω P. M. Curie, Paris, France (Hennequin C.)	Peter	0.000332347	CLI_5	AA	hom	FALSE
malade 6442	CIP	Catheter (therapy isolate)	Human, clinical	Human, clinical	Paris, France, H6	no	A	2	aneu;-1*3;+1*7;+1*11;+1*16;	Both	heterozygous	179	1. Wine/European	Inserm Universit≈Ω P. M. Curie, Paris, France (Hennequin C.)	Peter	0.000334763	CLI_3	AA	hom	FALSE
malade 6452	CIQ	Blood (therapy isolate)	Human, clinical	Human, clinical	Paris, France, H6	no	A	2	aneu;-1*3;	Loss	heterozygous	177	1. Wine/European	Inserm Universit≈Ω P. M. Curie, Paris, France (Hennequin C.)	Peter	0.000320672	CLI_4	AA	hom	FALSE
malade 97 138633/11-2-5	CKD	Feces (therapy isolate)	Human, clinical	Human, clinical	Paris, France, H2	no	A	2	euploid	Euploid	heterozygous	174	1. Wine/European	Inserm Universit≈Ω P. M. Curie, Paris, France (Hennequin C.)	Peter	0.000346083	CLI_12	AA	hom	FALSE
malade 98 1655/125391	CKB	Blood (therapy isolate)	Human, clinical	Human, clinical	Paris, France, H3	no	A	2	euploid	Euploid	heterozygous	164	1. Wine/European	Inserm Universit≈Ω P. M. Curie, Paris, France (Hennequin C.)	Peter	0.00033449	CLI_10	AA	hom	FALSE
malade 98 2574	CKM	Feces, therapy	Human, clinical	Human, clinical	Amiens, France	no	A	2	euploid	Euploid	heterozygous	197	1. Wine/European	Inserm Universit≈Ω P. M. Curie, Paris, France (Hennequin C.)	Peter	0.000335163	CLI_18	AA	hom	FALSE
malade 98 2601	CKN	Feces, clinical	Human, clinical	Human, clinical	Amiens, France	no	B	2	euploid	Euploid	heterozygous	196	M. Mosaic	Inserm Universit≈Ω P. M. Curie, Paris, France (Hennequin C.)	Peter	0.00466198	CLI_19	AB	het	FALSE
malade 98 3161	CKL	Feces, therapy	Human, clinical	Human, clinical	Amiens, France	no	A	2	euploid	Euploid	heterozygous	218	1. Wine/European	Inserm Universit≈Ω P. M. Curie, Paris, France (Hennequin C.)	Peter	0.000345284	CLI_17	AA	hom	FALSE
malade 98 3312	CKK	Feces, clinical	Human, clinical	Human, clinical	Amiens, France	no	B	4	euploid	Euploid	heterozygous	155	8. Mixed origin	Inserm Universit≈Ω P. M. Curie, Paris, France (Hennequin C.)	Peter	0.00622334	CLI_16	AB	het	FALSE
malade Berchid	CKS	Unknown	Human, clinical	Human, clinical	France	no	B	4	aneu;+1*15;-1*16;	Both	heterozygous	236	8. Mixed origin	Inserm Universit≈Ω P. M. Curie, Paris, France (Hennequin C.)	Peter	0.00602161	CLI_23	AB	het	FALSE
malade Boisse	CKV	Unknown	Human, clinical	Human, clinical	France	no	A	2	euploid	Euploid	heterozygous	232	5. French dairy	Inserm Universit≈Ω P. M. Curie, Paris, France (Hennequin C.)	Peter	0.00232367	CLI_25	AA	het	FALSE
malade Broussais	CKP	Unknown	Human, clinical	Human, clinical	Paris, France	no	A	2	euploid	Euploid	heterozygous	203	1. Wine/European	Inserm Universit≈Ω P. M. Curie, Paris, France (Hennequin C.)	Peter	0.000323417	CLI_20	AA	hom	FALSE
malade Darkman	CKR	Unknown	Human, clinical	Human, clinical	France	no	B	2	aneu;+1*6;	Gain	heterozygous	204	NA	Inserm Universit≈Ω P. M. Curie, Paris, France (Hennequin C.)	Peter	0.000843714	CLI_22	BB	hom	FALSE
malade Elbaz 6766	CIS	Therapy isolates (Blood)	Human, clinical	Human, clinical	Paris, France, H6	no	A	2	euploid	Euploid	heterozygous	200	1. Wine/European	Inserm Universit≈Ω P. M. Curie, Paris, France (Hennequin C.)	Peter	0.00033589	CLI_6	AA	hom	FALSE
malade Fauot	CKT	Unknown	Human, clinical	Human, clinical	France	no	A	2	euploid	Euploid	heterozygous	222	1. Wine/European	Inserm Universit≈Ω P. M. Curie, Paris, France (Hennequin C.)	Peter	0.000337551	CLI_24	AA	hom	FALSE
malade Hc6553	CIM	Blood (therapy isolate)	Human, clinical	Human, clinical	Paris, France, H6	no	A	2	aneu;+2*9;	Gain	heterozygous	169	1. Wine/European	Inserm Universit≈Ω P. M. Curie, Paris, France (Hennequin C.)	Peter	0.000334678	CLI_1	AA	hom	FALSE
malade M2402A Necker	CKQ	Feces (therapy isolate)	Human, clinical	Human, clinical	France	no	A	2	euploid	Euploid	heterozygous	192	1. Wine/European	Inserm Universit≈Ω P. M. Curie, Paris, France (Hennequin C.)	Peter	0.000321851	CLI_21	AA	hom	FALSE
malade Moreau	CLA	Unknown	Human, clinical	Human, clinical	France	no	B	4	aneu;-1*14;	Loss	heterozygous	195	8. Mixed origin	Inserm Universit≈Ω P. M. Curie, Paris, France (Hennequin C.)	Peter	0.00627777	CLI_26	AB	het	FALSE
malade Pac6436	CIN	Blood (therapy isolate)	Human, clinical	Human, clinical	Paris, France, H6	no	A	2	euploid	Euploid	heterozygous	176	1. Wine/European	Inserm Universit≈Ω P. M. Curie, Paris, France (Hennequin C.)	Peter	0.000326518	CLI_2	AA	hom	FALSE
MC10	AIT	Winery surface	Wine	Wine	Umbria, Italy	no	A	2	euploid	Euploid	homozygous	237	1. Wine/European	UniversitÀÜ politecnica delle Marche (Maurizio Ciani)	4	0.000190866	MC10	AA	hom	FALSE
MC5	AIN	Cooked wine (vino cotto)	Wine	Wine	Ascoli Piceno, Italy	no	A	2	euploid	Euploid	heterozygous	218	1. Wine/European	UniversitÀÜ politecnica delle Marche (Maurizio Ciani)	Peter	0.000398469	MC5	AA	hom	FALSE
MC6	AIP	Grape	Wine	Fruit	Umbria, Italy	no	A	2	aneu;+1*9;	Gain	heterozygous	233	1. Wine/European	UniversitÀÜ politecnica delle Marche (Maurizio Ciani)	4	0.000581961	MC6	AA	hom	FALSE
MC7	AIQ	Spontaneous alcoholic fermentation	Fermentation	Fermentation	Umbria, Italy	no	A	2	euploid	Euploid	heterozygous	251	1. Wine/European	UniversitÀÜ politecnica delle Marche (Maurizio Ciani)	4	0.000849629	MC7	AA	het	FALSE
MC8	AIR	Cooked wine (vino cotto)	Wine	Wine	Ascoli Piceno, Italy	no	A	2	euploid	Euploid	homozygous	244	1. Wine/European	UniversitÀÜ politecnica delle Marche (Maurizio Ciani)	Peter	0.000197619	MC8	AA	hom	FALSE
Me7	CGI	Unknown	Unknown	Unknown	Cai Be, South Vietnam	no	B	2	euploid	Euploid	heterozygous	270	26. Asian fermentation	INRA Gringnon, France (Nguyen H.V.)	Peter	0.00134961	Me7	BB	het	FALSE
MTF2546	CQC	Cocoa bean fermentation	Fermentation	Fermentation	West Africa	no	B	2	euploid	Euploid	heterozygous	259	12. West African cocoa	The Royal Veterinary and Agricultural University (Lene Jespersen)	21	0.00140521	MTF2546	BB	hom	FALSE
MTF2547	CQD	Cocoa bean fermentation	Fermentation	Fermentation	West Africa	no	B	2	euploid	Euploid	heterozygous	281	12. West African cocoa	The Royal Veterinary and Agricultural University (Lene Jespersen)	21	0.00140436	MTF2547	BB	hom	FALSE
MTF2548	CQE	Cocoa bean fermentation	Fermentation	Fermentation	West Africa	no	A	2	euploid	Euploid	heterozygous	215	12. West African cocoa	The Royal Veterinary and Agricultural University (Lene Jespersen)	21	0.00208572	MTF2548	AA	hom	FALSE
MTF2549	CQF	Cocoa bean fermentation	Fermentation	Fermentation	West Africa	no	A	2	euploid	Euploid	heterozygous	266	12. West African cocoa	The Royal Veterinary and Agricultural University (Lene Jespersen)	21	0.00141044	MTF2549	AA	hom	FALSE
MTF2550	CQG	Cocoa bean fermentation	Fermentation	Fermentation	West Africa	no	B	2	euploid	Euploid	heterozygous	231	12. West African cocoa	The Royal Veterinary and Agricultural University (Lene Jespersen)	21	0.00159736	MTF2550	BB	hom	FALSE
MTF2551	CQH	Cocoa bean fermentation	Fermentation	Fermentation	West Africa	no	A	2	euploid	Euploid	heterozygous	254	12. West African cocoa	The Royal Veterinary and Agricultural University (Lene Jespersen)	21	0.00203337	MTF2551	AA	hom	FALSE
MTF2552	CQI	Cocoa bean fermentation	Fermentation	Fermentation	West Africa	no	B	2	euploid	Euploid	heterozygous	268	12. West African cocoa	The Royal Veterinary and Agricultural University (Lene Jespersen)	21	0.00190856	MTF2552	BB	hom	FALSE
MTF2553	CQK	Cocoa bean fermentation	Fermentation	Fermentation	West Africa	no	A	2	euploid	Euploid	heterozygous	298	12. West African cocoa	The Royal Veterinary and Agricultural University (Lene Jespersen)	21	0.00152915	MTF2553	AA	hom	FALSE
MTF2554	CQL	Cocoa bean fermentation	Fermentation	Fermentation	West Africa	no	A	2	euploid	Euploid	heterozygous	215	12. West African cocoa	The Royal Veterinary and Agricultural University (Lene Jespersen)	21	0.00223522	MTF2554	AA	hom	FALSE
MTF2555	CQM	Cocoa bean fermentation	Fermentation	Fermentation	West Africa	no	A	2	euploid	Euploid	heterozygous	272	12. West African cocoa	The Royal Veterinary and Agricultural University (Lene Jespersen)	21	0.00229829	MTF2555	AA	hom	FALSE
MTF2556	CQN	Cocoa bean fermentation	Fermentation	Fermentation	West Africa	no	A	2	euploid	Euploid	heterozygous	222	12. West African cocoa	The Royal Veterinary and Agricultural University (Lene Jespersen)	21	0.00170861	MTF2556	AA	hom	FALSE
MTF2557	CQP	Cocoa bean fermentation	Fermentation	Fermentation	West Africa	no	A	2	euploid	Euploid	heterozygous	286	12. West African cocoa	The Royal Veterinary and Agricultural University (Lene Jespersen)	21	0.00135375	MTF2557	AA	hom	FALSE
MUCL_30909-2C	CEQ	Cassava	Fermentation	Fermentation	Burundi	no	A	2	euploid	Euploid	homozygous	161	M. Mosaic	State Research Institute of Genetics and Selection of Industrial Microorganisms (Naumov G.I.)	Peter	0.000358843	MUCL_30909_2C	AA	hom	FALSE
N134:7-1(a)	CET	Maize dough	Bakery	Bakery	Ghana	no	A	2	aneu;-1*9;	Loss	homozygous	232	6. African beer	State Research Institute of Genetics and Selection of Industrial Microorganisms (Naumov G.I.)	Peter	0.000222829	N134_7_1_a_	AA	hom	FALSE
N159.01-2B	CDH	Exudate of Quercus mongolica	Tree	Tree	Botanical garden, Blagoveshchensk, Russia	no	B	2	euploid	Euploid	homozygous	201	22. Far East Russian	State Research Institute of Genetics and Selection of Industrial Microorganisms (Naumov G.I.)	Peter	0.000344308	N159_01_2B	BB	hom	FALSE
N163.01-5A	CDI	Exudate of Quercus mongolica	Tree	Tree	Botanical garden, Blagoveshchensk, Russia	no	B	2	euploid	Euploid	homozygous	185	22. Far East Russian	State Research Institute of Genetics and Selection of Industrial Microorganisms (Naumov G.I.)	Peter	0.000336601	N163_01_5A	BB	hom	FALSE
N19-1C	CCL	Exudate of Quercus sp.	Tree	Tree	Gelendzhik region, Caucasus, Russia	no	A	2	euploid	Euploid	homozygous	298	4. Mediterranean oak	State Research Institute of Genetics and Selection of Industrial Microorganisms (Naumov G.I.)	Peter	0.000292712	N19_1C	AA	hom	FALSE
N22.00-5D	CDF	Fruit of Grataegus dachurica	Fruit	Fruit	Botanical garden, Blagoveshchensk, Russia	no	B	2	euploid	Euploid	homozygous	224	22. Far East Russian	State Research Institute of Genetics and Selection of Industrial Microorganisms (Naumov G.I.)	Peter	0.000338201	N22_00_5D	BB	hom	FALSE
N26-1-10:7-5(a)	CES	Maize dough	Bakery	Bakery	Ghana	no	A	2	aneu;-1*1;	1only	homozygous	143	6. African beer	State Research Institute of Genetics and Selection of Industrial Microorganisms (Naumov G.I.)	Peter	0.000195849	N26_1_10_7_5_a	AA	hom	TRUE
N3.00-7A	CDG	Grape berries of wild Vitus amurensis	Wine	Fruit	Botanical garden, Blagoveshchensk, Russia	no	B	2	euploid	Euploid	homozygous	269	22. Far East Russian	State Research Institute of Genetics and Selection of Industrial Microorganisms (Naumov G.I.)	Peter	0.000351522	N3_00_7A	BB	hom	FALSE
N34:2-4(a)	CER	Maize dough	Bakery	Bakery	Ghana	no	A	2	euploid	Euploid	homozygous	229	6. African beer	State Research Institute of Genetics and Selection of Industrial Microorganisms (Naumov G.I.)	Peter	0.000194622	N34_2_4_a	AA	hom	FALSE
N37-1A	CDC	Exudate of Quercus robur	Tree	Tree	Botanical Garden, Novosibirsk, Siberia, Russia	no	B	2	aneu;-1*5;	Loss	homozygous	234	M. Mosaic	State Research Institute of Genetics and Selection of Industrial Microorganisms (Naumov G.I.)	Peter	0.000313893	N37_1A	BB	hom	FALSE
N38-4A	CDD	Exudate of Quercus robur	Tree	Tree	Botanical Garden, Novosibirsk, Siberia, Russia	no	B	2	euploid	Euploid	homozygous	221	M. Mosaic	State Research Institute of Genetics and Selection of Industrial Microorganisms (Naumov G.I.)	Peter	0.000304258	N38_4A	BB	hom	FALSE
N39-7A	CDE	Exudate of Quercus robur	Tree	Tree	Novosibirsk, Siberia, Russia	no	B	2	euploid	Euploid	homozygous	202	M. Mosaic	State Research Institute of Genetics and Selection of Industrial Microorganisms (Naumov G.I.)	Peter	0.000309603	N39_7A	BB	hom	FALSE
N493-2C	CCM	Fir tree needles	Tree	Tree	Kiev district, Ukraine	no	A	2	euploid	Euploid	homozygous	262	1. Wine/European	State Research Institute of Genetics and Selection of Industrial Microorganisms (Naumov G.I.)	Peter	0.000194678	N493_2C	AA	hom	FALSE
N51-1A	CDL	Exudate of Quercus mongolica	Tree	Tree	Vladivostok, Russian Far East	no	B	2	euploid	Euploid	homozygous	261	18. Far East Asia	State Research Institute of Genetics and Selection of Industrial Microorganisms (Naumov G.I.)	Peter	0.000396146	N51_1A	BB	hom	FALSE
N95-5-1A	CDP	Exudate of Quercus sp.	Tree	Tree	Augusta, MI 49012, USA	no	B	2	euploid	Euploid	homozygous	267	NA	State Research Institute of Genetics and Selection of Industrial Microorganisms (Naumov G.I.)	Peter	0.000376537	N95_5_1A	BB	hom	FALSE
N95-6-1C	CDQ	Exudate of Quercus sp.	Tree	Tree	Augusta, MI 49012, USA	no	B	2	euploid	Euploid	homozygous	232	NA	State Research Institute of Genetics and Selection of Industrial Microorganisms (Naumov G.I.)	Peter	0.000369734	N95_6_1C	BB	hom	FALSE
NC_02_b	ADG	Exudate from Quercus sp.	Tree	Tree	North Carolina, USA	yes	B	1	euploid	Euploid	homozygous	265	NA	NA	1	0.000357561	NC_02_b	BB	hom	FALSE
NCYC_1187	CBR	Ale strain	Beer	Beer	UK	no	A	4	euploid	Euploid	heterozygous	150	11. Ale beer	National Collection of Yeast Cultures (NCYC)(Stephen A James and Ian Roberts)	Peter	0.00444186	NCYC_1187	AA	het	FALSE
NCYC_2743	CLH	Unknown	Wine	Unknown	Spain	no	A	2	aneu;+1*2;+1*13;+1*15;	Gain	homozygous	240	1. Wine/European	National Collection of Yeast Cultures (NCYC)(Stephen A James and Ian Roberts)	Peter	0.000172104	NCYC_2743	AA	hom	FALSE
NCYC_2780	BML	Vagina	Human, clinical	Human, clinical	Belgium	no	B	4	aneu;-1*3;+1*6;-1*7;-1*10;	Both	heterozygous	328	8. Mixed origin	National Collection of Yeast Cultures (NCYC)(Stephen A James and Ian Roberts)	Peter	0.0059333	NCYC_2780	AB	het	FALSE
NCYC_2798	BTA	Clinical isolate, AIDS patient	Human, clinical	Human, clinical	Germany	no	A	3	euploid	Euploid	heterozygous	217	M. Mosaic	National Collection of Yeast Cultures (NCYC)(Stephen A James and Ian Roberts)	Peter	0.0050706	NCYC_2798	AA	het	FALSE
NCYC_2925	BMG	Human sputum	Human, clinical	Human, clinical	Norway	no	A	3	aneu;+1*1;	1only	heterozygous	334	8. Mixed origin	National Collection of Yeast Cultures (NCYC)(Stephen A James and Ian Roberts)	Peter	0.00404787	NCYC_2925	AA	het	TRUE
NCYC_2966	CLG	Feces	Human, clinical	Human, clinical	Nottingham, UK	no	A	2	euploid	Euploid	heterozygous	268	M. Mosaic	National Collection of Yeast Cultures (NCYC)(Stephen A James and Ian Roberts)	Peter	0.00388952	NCYC_2966	AA	hom	FALSE
NCYC_88	CBN	Ale strain	Beer	Beer	UK	no	A	2	euploid	Euploid	homozygous	229	7. Mosaic beer	National Collection of Yeast Cultures (NCYC)(Stephen A James and Ian Roberts)	Peter	0.000266988	NCYC_88	AA	hom	FALSE
Nottingham_ale_1.8_Lallemand	CFH	Carlsberg Beer	Beer	Beer	UK	no	A	4	aneu;-1*1;-1*7;	Loss	heterozygous	222	11. Ale beer	Carlsberg	Peter	0.00452925	WLP039	AA	het	FALSE
NPA02-1	AKH	Palm wine	Palm wine	Palm wine	Nigeria	no	B	2	euploid	Euploid	homozygous	234	13. African palm wine	INRA Montpelier, France (Legras JL)	23	0.000298534	NPA02_1	BB	hom	FALSE
NPA03.1	AKE	Palm wine	Palm wine	Palm wine	Nigeria	no	B	2	euploid	Euploid	homozygous	194	13. African palm wine	INRA Montpelier, France (Legras JL)	23	0.000306536	NPA03_1	BB	hom	FALSE
NPA05a1	AKC	Palm wine	Palm wine	Palm wine	Nigeria	no	B	3	aneu;+1*14;	Gain	heterozygous	225	13. African palm wine	INRA Montpelier, France (Legras JL)	23	0.000787738	NPA05a1	BB	hom	FALSE
NPA05b1	AKD	Palm wine	Palm wine	Palm wine	Nigeria	no	B	3	euploid	Euploid	heterozygous	201	13. African palm wine	INRA Montpelier, France (Legras JL)	23	0.000606926	NPA05b1	BB	hom	FALSE
NPA06.1	AKG	Palm wine	Palm wine	Palm wine	Nigeria	no	B	2	euploid	Euploid	homozygous	224	13. African palm wine	INRA Montpelier, France (Legras JL)	23	0.000299331	NPA06_1	BB	hom	FALSE
NPA07.1	AKB	Palm wine	Palm wine	Palm wine	Nigeria	no	B	2	euploid	Euploid	heterozygous	238	13. African palm wine	INRA Montpelier, France (Legras JL)	23	0.000689747	NPA07_1	BB	het	FALSE
PB11	CIG	Feces	Human, clinical	Human, clinical	Netherlands	no	A	2	euploid	Euploid	heterozygous	246	M. Mosaic	Inserm Universit≈Ω P. M. Curie, Paris, France (Hennequin C.)	Peter	0.00307468	PB11	AA	hom	FALSE
PB12	CIH	Feces	Human, clinical	Human, clinical	Netherlands	no	B	2	euploid	Euploid	heterozygous	184	M. Mosaic	Inserm Universit≈Ω P. M. Curie, Paris, France (Hennequin C.)	Peter	0.00282695	PB12	BB	hom	FALSE
PB13	CII	Sputum	Human, clinical	Human, clinical	Netherlands	no	B	2	euploid	Euploid	heterozygous	173	M. Mosaic	Inserm Universit≈Ω P. M. Curie, Paris, France (Hennequin C.)	Peter	0.00357838	PB13	AB	het	FALSE
PB137	BAV	Bark of grape vine	Wine	Vineyard	Montalcino in Italy	no	A	2	euploid	Euploid	homozygous	262	1. Wine/European	Max Planck Institute for Evolutionary Biology (Primrose Boynton)	Peter	0.0001689	PB137	AA	hom	FALSE
PB14	CIK	Sputum	Human, clinical	Human, clinical	Netherlands	no	B	2	aneu;+1*11;	Gain	heterozygous	208	M. Mosaic	Inserm Universit≈Ω P. M. Curie, Paris, France (Hennequin C.)	Peter	0.00364232	PB14	AB	het	FALSE
PB15	CIL	Feces	Human, clinical	Human, clinical	Netherlands	no	A	2	euploid	Euploid	heterozygous	194	M. Mosaic	Inserm Universit≈Ω P. M. Curie, Paris, France (Hennequin C.)	Peter	0.00354591	PB15	AA	het	FALSE
PB197	BBA	Litter by trunk of Quercus sp. (Oak 4), next to vineyard	Soil	Soil	Montalcino in Italy	no	A	2	euploid	Euploid	homozygous	260	1. Wine/European	Max Planck Institute for Evolutionary Biology (Primrose Boynton)	Peter	0.000169138	PB197	AA	hom	FALSE
PB200	BBB	Soil by trunk of Quercus sp. (Oak K), next to vineyard	Soil	Soil	Montalcino in Italy	no	A	2	euploid	Euploid	homozygous	181	1. Wine/European	Max Planck Institute for Evolutionary Biology (Primrose Boynton)	Peter	0.000162505	PB200	AA	hom	FALSE
PB56	BAR	Bark from Quercus sp. (Oak 1), next to vineyard	Tree	Tree	Montalcino in Italy	no	A	2	euploid	Euploid	homozygous	251	1. Wine/European	Max Planck Institute for Evolutionary Biology (Primrose Boynton)	Peter	0.000170188	PB56	AA	hom	FALSE
PB67	BAS	Soil beneath grape vine	Soil	Soil	Montalcino in Italy	no	A	2	euploid	Euploid	homozygous	229	1. Wine/European	Max Planck Institute for Evolutionary Biology (Primrose Boynton)	Peter	0.000166055	PB67	AA	hom	FALSE
PB94	BAT	Soil by trunk of Quercus sp. (Oak 1), next to vineyard	Soil	Soil	Montalcino in Italy	no	A	2	euploid	Euploid	homozygous	245	1. Wine/European	Max Planck Institute for Evolutionary Biology (Primrose Boynton)	Peter	0.000164937	PB94	AA	hom	FALSE
perentol	CKI	S. boulardii√äisolates (from Perenterol capsule)	Human, clinical	Human, clinical	Brussels, Belgium	no	A	2	euploid	Euploid	heterozygous	195	1. Wine/European	Inserm Universit≈Ω P. M. Curie, Paris, France (Hennequin C.)	Peter	0.000334295	CLI_15	AA	hom	FALSE
Ponton 11	CIC	Mouth	Human, clinical	Human, clinical	Spain	no	B	2	euploid	Euploid	heterozygous	227	M. Mosaic	Inserm Universit≈Ω P. M. Curie, Paris, France (Hennequin C.)	Peter	0.00281883	P11	BB	het	FALSE
Ponton 12	CID	Mouth	Human, clinical	Human, clinical	Spain	no	B	2	euploid	Euploid	heterozygous	235	M. Mosaic	Inserm Universit≈Ω P. M. Curie, Paris, France (Hennequin C.)	Peter	0.00231139	P12	BB	hom	FALSE
Ponton 13	CIE	Mouth	Human, clinical	Human, clinical	Spain	no	B	3	aneu;+1*1;-1*3;-1*8;-1*9;-1*10;-1*13;	Both	heterozygous	212	8. Mixed origin	Inserm Universit≈Ω P. M. Curie, Paris, France (Hennequin C.)	Peter	0.00387883	P13	AB	het	FALSE
Ponton 14	CIF	Feces	Human, clinical	Human, clinical	Spain	no	B	2	euploid	Euploid	heterozygous	175	M. Mosaic	Inserm Universit≈Ω P. M. Curie, Paris, France (Hennequin C.)	Peter	0.00277953	P14	AB	het	FALSE
PR	ATA	Vineyard	Wine	Vineyard	France	no	A	2	euploid	Euploid	homozygous	276	1. Wine/European	Washington University School of Medicine (Justin C Fay)	5	0.000153509	PR	AA	hom	FALSE
PW5_b	ADE	Raphia palm wine	Palm wine	Palm wine	Aba, Abia State, Nigeria	yes	A	1	euploid	Euploid	homozygous	261	NA	Kruglyak Laboratory	1	0.000317365	PW5_b	AA	hom	FALSE
RB3-7Sc2	CRA	Wine	Wine	Wine	Italy	no	A	2	aneu;-1*1;	1only	heterozygous	195	1. Wine/European	University of Basilicata (Angela Capece and Patrizia Romano)	Peter	0.000573806	RB3_7Sc2	AA	hom	TRUE
RIB0001	ANR	Sake	Sake	Sake	Japan	no	B	2	aneu;+1*1;	1only	heterozygous	197	25. Sake	National Research Institute of Brewing, Hiroshima	Peter	0.000543178	RIB0001	BB	hom	TRUE
RIB0002	ANS	Sake	Sake	Sake	Japan	no	B	2	euploid	Euploid	heterozygous	196	25. Sake	National Research Institute of Brewing, Hiroshima	Peter	0.000381777	RIB0002	BB	hom	FALSE
RIB0003	ANT	Sake	Sake	Sake	Japan	no	B	2	aneu;+1*1;+1*8;	Gain	heterozygous	218	25. Sake	National Research Institute of Brewing, Hiroshima	Peter	0.000550471	RIB0003	BB	hom	FALSE
RIB0004	ANV	Sake	Sake	Sake	Japan	no	B	2	aneu;+1*1;+1*8;	Gain	heterozygous	217	25. Sake	National Research Institute of Brewing, Hiroshima	Peter	0.000550751	RIB0004	BB	hom	FALSE
RIB0005	APA	Sake	Sake	Sake	Japan	no	B	2	euploid	Euploid	heterozygous	202	25. Sake	National Research Institute of Brewing, Hiroshima	Peter	0.000409669	RIB0005	BB	hom	FALSE
RIB0007	CMN	Sake	Sake	Sake	Japan	no	B	2	aneu;+1*1;	1only	heterozygous	145	25. Sake	National Research Institute of Brewing, Hiroshima	Peter	0.000579794	RIB0007	BB	hom	TRUE
RIB1001	APC	Sake	Sake	Sake	Japan	no	B	2	euploid	Euploid	heterozygous	284	25. Sake	National Research Institute of Brewing, Hiroshima	Peter	0.000444632	RIB1001	BB	het	FALSE
RIB1002	APD	Sake	Sake	Sake	Japan	no	B	2	aneu;+1*9;	Gain	heterozygous	284	25. Sake	National Research Institute of Brewing, Hiroshima	Peter	0.000450689	RIB1002	BB	het	FALSE
RIB1003	APE	Sake	Sake	Sake	Japan	no	B	2	aneu;+1*3;+1*11;	Gain	heterozygous	220	25. Sake	National Research Institute of Brewing, Hiroshima	Peter	0.000373364	RIB1003	BB	hom	FALSE
RIB1004	APF	Sake	Sake	Sake	Japan	no	B	2	euploid	Euploid	heterozygous	210	25. Sake	National Research Institute of Brewing, Hiroshima	Peter	0.000389835	RIB1004	BB	hom	FALSE
RIB1005	BTS	Sake	Sake	Sake	Japan	no	B	2	aneu;+1*11;	Gain	heterozygous	271	25. Sake	National Research Institute of Brewing, Hiroshima	Peter	0.00070772	RIB1005	BB	hom	FALSE
RIB1006	CQQ	Sake	Sake	Sake	Japan	no	B	2	aneu;+1*3;	Gain	heterozygous	234	25. Sake	National Research Institute of Brewing, Hiroshima	Peter	0.000393136	RIB1006	BB	het	FALSE
RIB1007	CQR	Sake	Sake	Sake	Japan	no	B	2	aneu;+1*3;	Gain	heterozygous	237	25. Sake	National Research Institute of Brewing, Hiroshima	Peter	0.000401804	RIB1007	BB	het	FALSE
RIB1008	CLR	Sake	Sake	Sake	Japan	no	B	2	euploid	Euploid	heterozygous	206	25. Sake	National Research Institute of Brewing, Hiroshima	Peter	0.000358782	RIB1008	BB	hom	FALSE
RIB1010	CLS	Sake	Sake	Sake	Japan	no	B	2	euploid	Euploid	heterozygous	197	25. Sake	National Research Institute of Brewing, Hiroshima	Peter	0.000374301	RIB1010	BB	hom	FALSE
RIB1011	CLT	Sake	Sake	Sake	Japan	no	B	2	aneu;+1*9;	Gain	heterozygous	181	25. Sake	National Research Institute of Brewing, Hiroshima	Peter	0.000385913	RIB1011	BB	hom	FALSE
RIB1012	CLV	Sake	Sake	Sake	Japan	no	B	2	aneu;+1*3;+1*9;	Gain	heterozygous	167	25. Sake	National Research Institute of Brewing, Hiroshima	Peter	0.000378726	RIB1012	BB	het	FALSE
RIB1014	CMB	Sake	Sake	Sake	Japan	no	B	2	aneu;+1*11;	Gain	heterozygous	177	25. Sake	National Research Institute of Brewing, Hiroshima	Peter	0.000366721	RIB1014	BB	het	FALSE
RIB1015	CMC	Sake	Sake	Sake	Japan	no	B	2	aneu;+1*14;	Gain	heterozygous	134	25. Sake	National Research Institute of Brewing, Hiroshima	Peter	0.000407176	RIB1015	BB	hom	FALSE
RIB1016	CMD	Sake	Sake	Sake	Japan	no	B	2	aneu;+1*3;+1*9;	Gain	heterozygous	148	25. Sake	National Research Institute of Brewing, Hiroshima	Peter	0.000414997	RIB1016	BB	hom	FALSE
RIB1017	CME	Sake	Sake	Sake	Japan	no	B	2	aneu;+1*9;	Gain	heterozygous	188	25. Sake	National Research Institute of Brewing, Hiroshima	Peter	0.000393045	RIB1017	BB	hom	FALSE
RIB6001	CMF	Sake	Sake	Sake	Japan	no	B	2	aneu;+1*3;	Gain	heterozygous	157	25. Sake	National Research Institute of Brewing, Hiroshima	Peter	0.000524159	RIB6001	BB	hom	FALSE
RIB6002	CMG	Sake	Sake	Sake	Japan	no	B	3	aneu;-1*1;+1*8;	Both	heterozygous	194	M. Mosaic	National Research Institute of Brewing, Hiroshima	Peter	0.00470493	RIB6002	BB	het	FALSE
RIB6003	CMH	Sake	Sake	Sake	Japan	no	B	2	euploid	Euploid	heterozygous	185	25. Sake	National Research Institute of Brewing, Hiroshima	Peter	0.000691609	RIB6003	BB	hom	FALSE
RIB6004	CMI	Sake	Sake	Sake	Japan	no	B	2	euploid	Euploid	heterozygous	168	25. Sake	National Research Institute of Brewing, Hiroshima	Peter	0.000452652	RIB6004	BB	hom	FALSE
RIB6005	CMK	Sake	Sake	Sake	Japan	no	B	2	euploid	Euploid	heterozygous	188	25. Sake	National Research Institute of Brewing, Hiroshima	Peter	0.000578128	RIB6005	BB	hom	FALSE
RIB6006	CML	Sake	Sake	Sake	Japan	no	B	2	aneu;-1*1;	1only	homozygous	130	25. Sake	National Research Institute of Brewing, Hiroshima	Peter	0.000294605	RIB6006	BB	hom	TRUE
RIB6007	CMM	Sake	Sake	Sake	Japan	no	B	2	aneu;+1*3;	Gain	heterozygous	122	25. Sake	National Research Institute of Brewing, Hiroshima	Peter	0.000428344	RIB6007	BB	het	FALSE
RIB6008	AVL	Sake	Sake	Sake	Japan	no	B	2	aneu;+1*3;	Gain	heterozygous	195	25. Sake	National Research Institute of Brewing, Hiroshima	Peter	0.000383119	RIB6008	BB	het	FALSE
RIB6009	AVM	Sake	Sake	Sake	Japan	no	B	2	aneu;+1*3;+1*11;	Gain	heterozygous	217	25. Sake	National Research Institute of Brewing, Hiroshima	Peter	0.000351422	RIB6009	BB	het	FALSE
RM11-1a	AAA	Zinfandel vineyard	Wine	Vineyard	California, USA	yes	A	1	euploid	Euploid	homozygous	218	1. Wine/European	Kruglyak Laboratory	Peter	0.00015613	RM11_1a	AA	hom	FALSE
RP.10.13	BVB	Bioethanol	Bioethanol	Bioethanol	Brazil	no	A	2	euploid	Euploid	heterozygous	249	3. Brazilian bioethanol	IBB-Unesp (Ana Teresa B. F. Antonangelo )	13	0.00294421	RP_10_13	AA	hom	FALSE
RP.10.14	BVC	Bioethanol	Bioethanol	Bioethanol	Brazil	no	A	2	euploid	Euploid	heterozygous	190	3. Brazilian bioethanol	IBB-Unesp (Ana Teresa B. F. Antonangelo )	13	0.00250626	RP_10_14	AA	hom	FALSE
RP.10.4	BVA	Bioethanol	Bioethanol	Bioethanol	Brazil	no	A	2	euploid	Euploid	heterozygous	247	3. Brazilian bioethanol	IBB-Unesp (Ana Teresa B. F. Antonangelo )	13	0.0024219	RP_10_4	AA	hom	FALSE
RP11.4.1	CNS	Bioethanol	Bioethanol	Bioethanol	Brazil	no	A	2	euploid	Euploid	heterozygous	171	3. Brazilian bioethanol	IBB-Unesp (Ana Teresa B. F. Antonangelo )	13	0.00255394	RP11_4_1	AA	hom	FALSE
RP11.4.11	CNT	Bioethanol	Bioethanol	Bioethanol	Brazil	no	A	2	euploid	Euploid	heterozygous	214	3. Brazilian bioethanol	IBB-Unesp (Ana Teresa B. F. Antonangelo )	13	0.00254671	RP11_4_11	AA	hom	FALSE
RP11.4.14	CNV	Bioethanol	Bioethanol	Bioethanol	Brazil	no	A	2	aneu;+1*6;	Gain	heterozygous	316	3. Brazilian bioethanol	IBB-Unesp (Ana Teresa B. F. Antonangelo )	13	0.00184171	RP11_4_14	AA	hom	FALSE
RR1a	CGQ	Unknown	Unknown	Unknown	My Tho, South Vietnam	no	B	2	euploid	Euploid	heterozygous	260	26. Asian fermentation	INRA Gringnon, France (Nguyen H.V.)	Peter	0.000725586	RR1a	BB	hom	FALSE
S11F3-6B	CCT	Phloem sap of Caryota urens	Tree	Tree	Sri Lanka	no	B	2	euploid	Euploid	homozygous	223	24. Asian islands	State Research Institute of Genetics and Selection of Industrial Microorganisms (Naumov G.I.)	Peter	0.00033326	S11F3_6B	BB	hom	FALSE
S8BM-30-2D	CCV	Phloem sap of Caryota urens	Tree	Tree	Sri Lanka	no	B	2	euploid	Euploid	homozygous	199	24. Asian islands	State Research Institute of Genetics and Selection of Industrial Microorganisms (Naumov G.I.)	Peter	0.000339231	S8BM_30_2D	BB	hom	FALSE
S8BM-32-4D(a)	CDA	Phloem sap of Caryota urens	Tree	Tree	Sri Lanka	yes	B	1	euploid	Euploid	homozygous	247	24. Asian islands	State Research Institute of Genetics and Selection of Industrial Microorganisms (Naumov G.I.)	Peter	0.000308192	S8BM_32_4D_a	BB	hom	FALSE
SA.1.5.	CNK	Bioethanol	Bioethanol	Bioethanol	Brazil	no	A	2	euploid	Euploid	heterozygous	349	3. Brazilian bioethanol	IBB-Unesp (Ana Teresa B. F. Antonangelo )	13	0.00173412	SA_1_5_	AA	hom	FALSE
SA.10.1.VL1	CNQ	Bioethanol	Bioethanol	Bioethanol	Brazil	no	A	2	euploid	Euploid	heterozygous	239	3. Brazilian bioethanol	IBB-Unesp (Ana Teresa B. F. Antonangelo )	13	0.00327746	SA_10_1_VL1	AA	het	FALSE
SA.10.1.VR4	CNR	Bioethanol	Bioethanol	Bioethanol	Brazil	no	B	2	euploid	Euploid	heterozygous	220	3. Brazilian bioethanol	IBB-Unesp (Ana Teresa B. F. Antonangelo )	13	0.00245661	SA_10_1_VR4	AB	het	FALSE
SA.9.2.BL3	CNL	Bioethanol	Bioethanol	Bioethanol	Brazil	no	A	2	aneu;+1*3;	Gain	heterozygous	320	3. Brazilian bioethanol	IBB-Unesp (Ana Teresa B. F. Antonangelo )	13	0.00325777	SA_9_2_BL3	AA	hom	FALSE
SA.9.3.VR1	CNM	Bioethanol	Bioethanol	Bioethanol	Brazil	no	A	2	euploid	Euploid	heterozygous	202	3. Brazilian bioethanol	IBB-Unesp (Ana Teresa B. F. Antonangelo )	13	0.00263072	SA_9_3_VR1	AA	hom	FALSE
SA.9.4.BR2	CNP	Bioethanol	Bioethanol	Bioethanol	Brazil	no	A	2	euploid	Euploid	heterozygous	164	3. Brazilian bioethanol	IBB-Unesp (Ana Teresa B. F. Antonangelo )	13	0.00228076	SA_9_4_BR2	AA	hom	FALSE
SA.9.4.VL4	CNN	Bioethanol	Bioethanol	Bioethanol	Brazil	no	A	2	euploid	Euploid	heterozygous	194	3. Brazilian bioethanol	IBB-Unesp (Ana Teresa B. F. Antonangelo )	13	0.00305874	SA_9_4_VL4	AA	hom	FALSE
SA6-31	BVM	Spontaneous grape fermentation	Wine	Must	Toscana, Italy	no	A	2	euploid	Euploid	homozygous	241	1. Wine/European	University of Basilicata (Angela Capece and Patrizia Romano)	Peter	0.000217765	SA6_31	AA	hom	FALSE
sample 33	CLD	Flower	Flower	Flower	Bordeaux, France	no	A	2	aneu;+2*3;	Gain	homozygous	224	4. Mediterranean oak	Schacherer Laboratory	Peter	0.00029502	STG_3	AA	hom	FALSE
sample 40	CLB	Tree leaves	Tree	Tree	Bordeaux, France	no	A	2	euploid	Euploid	homozygous	264	4. Mediterranean oak	Schacherer Laboratory	Peter	0.000284578	STG_1	AA	hom	FALSE
sample 50	CLC	Dead tree	Tree	Tree	Bordeaux, France	no	A	2	aneu;+2*3;	Gain	homozygous	182	4. Mediterranean oak	Schacherer Laboratory	Peter	0.000299613	STG_2	AA	hom	FALSE
SBD	CHM	Bakery	Bakery	Bakery	Northern Europe	no	B	2	euploid	Euploid	heterozygous	296	26. Asian fermentation	INRA Moulon, France (Sicard D.)	Peter	0.000763731	SBD	BB	hom	FALSE
SBE-1C	CHL	Bakery	Bakery	Bakery	Northern Europe	no	A	2	aneu;+1*2;+1*13;	Gain	heterozygous	184	8. Mixed origin	INRA Moulon, France (Sicard D.)	Peter	0.00325615	SBE_1C	AA	het	FALSE
SC 29 F. Dromer IP	CHR	Vagina	Human, clinical	Human, clinical	France	no	B	2	euploid	Euploid	heterozygous	212	8. Mixed origin	Inserm Universit≈Ω P. M. Curie, Paris, France (Hennequin C.)	Peter	0.00384627	FD29	AB	het	FALSE
SC 32 F. Dromer IP	CHS	Feces	Human, clinical	Human, clinical	France	no	B	2	euploid	Euploid	heterozygous	221	M. Mosaic	Inserm Universit≈Ω P. M. Curie, Paris, France (Hennequin C.)	Peter	0.00229808	FD32	BB	hom	FALSE
SC 33 F. Dromer IP	CHT	Feces	Human, clinical	Human, clinical	France	no	B	2	euploid	Euploid	heterozygous	286	M. Mosaic	Inserm Universit≈Ω P. M. Curie, Paris, France (Hennequin C.)	Peter	0.00234086	FD33	BB	hom	FALSE
SC2-37	CRB	Wine	Wine	Wine	Italy	no	A	2	euploid	Euploid	homozygous	182	1. Wine/European	INRA Gringnon, France (Nguyen H.V.)	Peter	0.000177703	SC2_37	AA	hom	FALSE
SD-15	CBF	Sourdough levan	Bakery	Bakery	Matera, Italy	no	B	4	aneu;+1*9;	Gain	heterozygous	232	8. Mixed origin	University of Basilicata (Angela Capece and Patrizia Romano)	Peter	0.00636209	SD_15	AB	het	FALSE
SG4	CGP	Unknown	Unknown	Unknown	Saigon, South Vietnam	no	B	2	euploid	Euploid	heterozygous	247	26. Asian fermentation	INRA Gringnon, France (Nguyen H.V.)	Peter	0.00127457	SG4	BB	hom	FALSE
SG60	BSN	Wine	Wine	Wine	Italy	no	B	2	euploid	Euploid	heterozygous	228	1. Wine/European	University of Florence (Duccio Cavalieri)	8	0.00105522	SG60	AB	het	FALSE
SGB1	CGN	Rice fermentation starter culture	Fermentation	Fermentation	Saigon, South Vietnam	no	B	2	euploid	Euploid	heterozygous	224	26. Asian fermentation	INRA Gringnon, France (Nguyen H.V.)	Peter	0.00108343	SGB1	BB	hom	FALSE
SGU89	BSM	Wine	Wine	Wine	Italy	no	B	2	euploid	Euploid	heterozygous	230	1. Wine/European	University of Florence (Duccio Cavalieri)	8	0.0010488	SGU89	AB	het	FALSE
SJ1L04	AMI	Leaf of Podocarppus macrophyllus	Tree	Tree	Yuchih, Nantou, Taiwan	no	B	3	aneu;+1*1;	1only	heterozygous	251	8. Mixed origin	National Hsinchu University of Education (Ching-Fu Lee)	25	0.00472047	SJ1L04	AB	het	TRUE
SJ5L11	AML	Leaf of Acacia dealbata	Tree	Tree	Tuchih, Nantou, Taiwan	no	B	3	euploid	Euploid	heterozygous	204	8. Mixed origin	National Hsinchu University of Education (Ching-Fu Lee)	25	0.00440893	SJ5L11	AB	het	FALSE
SJ5L12	AMM	Leaf of Trema orientalis	Tree	Tree	Beinan, Taitung, Taiwan	no	B	2	euploid	Euploid	homozygous	212	NA	National Hsinchu University of Education (Ching-Fu Lee)	25	0.000380707	SJ5L12	BB	hom	FALSE
SJ5L13	AMN	Leaf of Wendlandia formosana	Tree	Tree	Tuchih, Nantou, Taiwan	no	B	4	euploid	Euploid	heterozygous	253	8. Mixed origin	National Hsinchu University of Education (Ching-Fu Lee)	25	0.00594319	SJ5L13	AB	het	FALSE
SJ5L14	AMP	Fruiting body of Auricularia auricular	Fruit	Fruit	Taian, Miaoli, Taiwan	no	A	2	euploid	Euploid	heterozygous	183	M. Mosaic	National Hsinchu University of Education (Ching-Fu Lee)	25	0.00129466	SJ5L14	AA	het	FALSE
SJ5L15	AMQ	Leaf of Acacia dealbata	Tree	Tree	Tuchih, Nantou, Taiwan	no	B	3	euploid	Euploid	heterozygous	191	8. Mixed origin	National Hsinchu University of Education (Ching-Fu Lee)	25	0.00472922	SJ5L15	AB	het	FALSE
SJ5L16	AMR	Soil	Soil	Soil	Jhuosi, Hualein, Taiwan	no	A	2	euploid	Euploid	homozygous	223	1. Wine/European	National Hsinchu University of Education (Ching-Fu Lee)	25	0.000210531	SJ5L16	AA	hom	FALSE
SJ5L17	AMS	Probiotic	Probiotic	Probiotic	Austria	no	A	2	euploid	Euploid	heterozygous	216	1. Wine/European	Biomin	Peter	0.00060792	SJ5L17	AA	hom	FALSE
SJ5L18	AMT	Probiotic	Probiotic	Probiotic	Austria	no	A	2	euploid	Euploid	heterozygous	251	1. Wine/European	Biomin	Peter	0.000328831	SJ5L18	AA	hom	FALSE
SJ6L01	AMK	Leaf of Cunninghamia lanceolata	Tree	Tree	Tuchih, Nantou, Taiwan	no	B	3	aneu;-1*7;	Loss	heterozygous	232	8. Mixed origin	National Hsinchu University of Education (Ching-Fu Lee)	25	0.00452521	SJ6L01	AB	het	FALSE
SJ7L01	AMG	Leaf of Ardisia cornudentata	Tree	Tree	Tuchih, Nantou, Taiwan	no	B	3	euploid	Euploid	heterozygous	189	8. Mixed origin	National Hsinchu University of Education (Ching-Fu Lee)	25	0.00479321	SJ7L01	AB	het	FALSE
SK1	SACE_GAL	Lab strain	Lab strain	Lab strain	USA	no	B	2	euploid	Euploid	homozygous	24	13. African palm wine	Rosenstiel Basic Medical Sciences Research Center (James E Haber)	6	0.000197348	SK1	BB	het	FALSE
SM.8.2.C13	CNB	Bioethanol	Bioethanol	Bioethanol	Brazil	no	A	2	euploid	Euploid	heterozygous	311	3. Brazilian bioethanol	IBB-Unesp (Ana Teresa B. F. Antonangelo )	13	0.00326886	SM_8_2_C13	AA	hom	FALSE
SM.8.7.BR1	CNG	Bioethanol	Bioethanol	Bioethanol	Brazil	no	A	2	euploid	Euploid	heterozygous	212	3. Brazilian bioethanol	IBB-Unesp (Ana Teresa B. F. Antonangelo )	13	0.00243481	SM_8_7_BR1	AA	hom	FALSE
SM.8.7.L8	CNE	Bioethanol	Bioethanol	Bioethanol	Brazil	no	A	2	euploid	Euploid	heterozygous	188	3. Brazilian bioethanol	IBB-Unesp (Ana Teresa B. F. Antonangelo )	13	0.00315013	SM_8_7_L8	AA	hom	FALSE
SM.8.7.L9	CNF	Bioethanol	Bioethanol	Bioethanol	Brazil	no	A	2	euploid	Euploid	heterozygous	219	3. Brazilian bioethanol	IBB-Unesp (Ana Teresa B. F. Antonangelo )	13	0.00321672	SM_8_7_L9	AA	hom	FALSE
SM.8.8.BL1	CNH	Bioethanol	Bioethanol	Bioethanol	Brazil	no	A	2	euploid	Euploid	heterozygous	241	3. Brazilian bioethanol	IBB-Unesp (Ana Teresa B. F. Antonangelo )	13	0.00240341	SM_8_8_BL1	AA	hom	FALSE
SM.8.8.CVR1	CNI	Bioethanol	Bioethanol	Bioethanol	Brazil	no	A	2	euploid	Euploid	heterozygous	289	3. Brazilian bioethanol	IBB-Unesp (Ana Teresa B. F. Antonangelo )	13	0.00232363	SM_8_8_CVR1	AA	hom	FALSE
SM.9.1.AL1	BVD	Bioethanol	Bioethanol	Bioethanol	Brazil	no	A	2	euploid	Euploid	homozygous	225	3. Brazilian bioethanol	IBB-Unesp (Ana Teresa B. F. Antonangelo )	13	0.00034021	SM_9_1_AL1	AA	hom	FALSE
SM.9.1.BL7	BVE	Bioethanol	Bioethanol	Bioethanol	Brazil	no	A	1	euploid	Euploid	homozygous	254	3. Brazilian bioethanol	IBB-Unesp (Ana Teresa B. F. Antonangelo )	13	0.000252315	SM_9_1_BL7	AA	hom	FALSE
SM.9.2.BR3(L)	BVF	Bioethanol	Bioethanol	Bioethanol	Brazil	no	A	2	euploid	Euploid	heterozygous	243	3. Brazilian bioethanol	IBB-Unesp (Ana Teresa B. F. Antonangelo )	13	0.00265582	SM_9_2_BR3_L	AA	hom	FALSE
SM.9.4.BL2	BVG	Bioethanol	Bioethanol	Bioethanol	Brazil	no	A	2	euploid	Euploid	heterozygous	263	3. Brazilian bioethanol	IBB-Unesp (Ana Teresa B. F. Antonangelo )	13	0.00324023	SM_9_4_BL2	AA	hom	FALSE
SM.9.4.BR1	BVH	Bioethanol	Bioethanol	Bioethanol	Brazil	no	A	2	euploid	Euploid	heterozygous	71	3. Brazilian bioethanol	IBB-Unesp (Ana Teresa B. F. Antonangelo )	13	0.00311283	SM_9_4_BR1	AA	hom	FALSE
SM.9.4.BR2	CMT	Bioethanol	Bioethanol	Bioethanol	Brazil	no	A	2	euploid	Euploid	heterozygous	115	3. Brazilian bioethanol	IBB-Unesp (Ana Teresa B. F. Antonangelo )	13	0.00182579	SM_9_4_BR2	AA	hom	FALSE
SM8.3.M5	CNC	Bioethanol	Bioethanol	Bioethanol	Brazil	no	A	2	euploid	Euploid	heterozygous	217	M. Mosaic	IBB-Unesp (Ana Teresa B. F. Antonangelo )	13	0.00366869	SM8_3_M5	AA	het	FALSE
SRC 120	CHV	Cider bioindustrial strain	Cider	Cider	France	no	A	2	aneu;+1*9;+1*11;+1*16;	Gain	homozygous	267	M. Mosaic	Inserm Universit≈Ω P. M. Curie, Paris, France (Hennequin C.)	Peter	0.000270091	SRC120	AA	hom	FALSE
SRC 147	CIA	Bioindustrial strains	Industrial	Industrial	Bretagne, France	no	A	2	euploid	Euploid	homozygous	263	1. Wine/European	Inserm Universit≈Ω P. M. Curie, Paris, France (Hennequin C.)	Peter	0.000187022	SRC147	AA	hom	FALSE
SRC 213	CIB	Bioindustrial strains	Industrial	Industrial	Bretagne, France	no	A	2	euploid	Euploid	homozygous	220	1. Wine/European	Inserm Universit≈Ω P. M. Curie, Paris, France (Hennequin C.)	Peter	0.000187051	SRC213	AA	hom	FALSE
SX1	BAG	Bark from tree in Fagaceae family	Tree	Tree	Qinling Mountain, Shaanxi province, China	no	B	2	euploid	Euploid	homozygous	201	15. CHNII	Chinese Academy of Sciences (Feng-Yan Bai)	24	0.000333121	SX1	AB	hom	FALSE
SX3	BAH	Bark from Carya sp.	Tree	Tree	Qinling Mountain, Shaanxi province, China	no	B	2	euploid	Euploid	homozygous	230	15. CHNII	Chinese Academy of Sciences (Feng-Yan Bai)	24	0.000311191	SX3	AB	hom	FALSE
T7_b	ADH	Exudate from Quercus sp.	Tree	Tree	Babler State Park, MO, USA	yes	B	1	euploid	Euploid	homozygous	287	26. Asian fermentation	Kruglyak Laboratory	1	0.000233732	T7_b	BB	hom	FALSE
T73_1b	ADS	Monastrel grape fermentation (red wine)	Wine	Wine	Alicante, Spain	no	A	2	euploid	Euploid	homozygous	210	1. Wine/European	Kruglyak Laboratory	1	0.000156098	T73_1b	AA	hom	FALSE
TayTa	CGG	Unknown	Unknown	Unknown	Long An, South Vietnam	no	B	2	euploid	Euploid	heterozygous	231	26. Asian fermentation	INRA Gringnon, France (Nguyen H.V.)	Peter	0.000997147	TayTa	BB	hom	FALSE
TL229S2.2	ACB	Cheese	Dairy	Dairy	France	yes	A	1	euploid	Euploid	homozygous	249	M. Mosaic	Kruglyak Laboratory	1	0.000161922	TL229S2_2	AA	hom	FALSE
UC1_1b	ADC	Wine	Wine	Wine	France	yes	A	1	euploid	Euploid	homozygous	259	1. Wine/European	Kruglyak Laboratory	1	0.000151325	UC1_1b	AA	hom	FALSE
UC10	ATM	Wine	Wine	Wine	California, USA	no	A	2	euploid	Euploid	homozygous	175	1. Wine/European	Washington University School of Medicine (Justin C Fay)	5	0.000184281	UC10	AA	hom	FALSE
UC4	ATH	Vineyard	Wine	Vineyard	Germany	no	A	2	euploid	Euploid	heterozygous	214	1. Wine/European	Washington University School of Medicine (Justin C Fay)	5	0.000368727	UC4	AA	hom	FALSE
UC5	CLQ	Sake	Sake	Sake	Japan	no	B	1	aneu;+1*1;	1only	homozygous	191	25. Sake	Washington University School of Medicine (Justin C Fay)	5	0.000253932	UC5	BB	hom	TRUE
UC8_1b	ACT	Wine	Wine	Wine	South Africa	yes	A	1	aneu;+1*1;	1only	homozygous	243	1. Wine/European	Kruglyak Laboratory	1	0.000183808	UC8_1b	AA	hom	TRUE
UCD_05-780	CGB	Beetle from infested Prunus bokhariensis, walk plate on RBCA. No mold on plate. Prunus bokhariensis Type Botanky E-1-18	Insect	Insect	Winters, CA Wolfskill USDA Prunus germplasm collection,	no	A	2	euploid	Euploid	homozygous	211	M. Mosaic	Phaff collection (?)	Peter	0.000290751	UCD_05_780	AA	hom	FALSE
UCD_06-645	CGC	Female olive fly, surface sterilized, smashed, plated on RBCA	Fruit	Fruit	Davis, CA, UCD	no	A	4	euploid	Euploid	heterozygous	302	11. Ale beer	Phaff collection	Peter	0.00395752	UCD_06_645	AA	het	FALSE
UCD_09-448	CGD	Olives from Middle of season 1. on RBCA 11.25.09 Streaked onto PDA 11/30/09	Fruit	Fruit	Davis, CA, UCD	no	A	2	euploid	Euploid	homozygous	190	2. Alpechin	Phaff collection	Peter	0.000309087	UCD_09_448	AA	hom	FALSE
UCD_11-601	CGE	Olive fermentation, 1-gallon, Bucket 5B brine, Sicilian style olives, inoculated with Saccharomyces cerevisiase from 2009 olives.	Fruit	Fruit	Davis, CA, UCD Food Science, Pilot plant.	no	A	2	euploid	Euploid	homozygous	190	2. Alpechin	Phaff collection	Peter	0.000309601	UCD_11_601	AA	hom	FALSE
UCD_40-235	CFQ	Muscate grapes	Wine	Fruit	Walnut Creek, California	no	A	2	euploid	Euploid	homozygous	340	1. Wine/European	Phaff collection	Peter	0.000199642	UCD_40_235	AA	hom	FALSE
UCD_40-248	CFR	Muscat must to be fortified (1939)	Wine	Must	Tulare Winery, California	no	A	2	euploid	Euploid	homozygous	219	1. Wine/European	Phaff collection	Peter	0.000188191	UCD_40_248	AA	hom	FALSE
UCD_40-255	CFS	Red Tokay grapes (1939)	Wine	Fruit	Walnut Creek, California	no	A	4	aneu;+1*2;-1*6;	Both	homozygous	302	1. Wine/European	Phaff collection	Peter	0.00021085	UCD_40_255	AA	hom	FALSE
UCD_40-346	CFT	Spoiled Adriatic orchard figs, (1939)	Fruit	Fruit	Fresno area, California	no	A	2	aneu;+1*5;+1*9;	Gain	heterozygous	246	M. Mosaic	Phaff collection	Peter	0.00254301	UCD_40_346	AA	het	FALSE
UCD_40-49	CFV	Citrus fermentation	Fruit	Fruit	NA	no	A	2	aneu;+1*1;+1*4;	Gain	homozygous	291	1. Wine/European	Phaff collection	Peter	0.000165498	UCD_40_49	AA	hom	FALSE
UCD_61-190-6A	CDN	Drosophila sp.	Insect	Insect	California, USA	no	B	2	aneu;+2*1;+2*3;	Gain	homozygous	253	NA	State Research Institute of Genetics and Selection of Industrial Microorganisms (Naumov G.I.)	Peter	0.000454191	UCD_61_190_6A	BB	hom	FALSE
UFRJ_50613-2D(a)	CDM	Cushvara river	Water	Water	Rio de Janeiro, Brazil	no	A	2	euploid	Euploid	homozygous	260	M. Mosaic	State Research Institute of Genetics and Selection of Industrial Microorganisms (Naumov G.I.)	Peter	0.000301179	UFRJ_50613_2D_a	AA	hom	FALSE
UL G84F88I90	CKG	S. boulardii√äisolates lychee (reference strain Biocodex)	Fruit	Fruit	Vietnam	no	A	2	euploid	Euploid	heterozygous	202	1. Wine/European	Inserm Universit≈Ω P. M. Curie, Paris, France (Hennequin C.)	Peter	0.000347915	ULG84F88I90	AA	hom	FALSE
ultra lev. 1127	CKH	S. boulardii√äisolates (from UltraLevure packet)	Industrial	Industrial	Paris, France	no	A	2	euploid	Euploid	heterozygous	186	1. Wine/European	Inserm Universit≈Ω P. M. Curie, Paris, France (Hennequin C.)	Peter	0.000342702	Lot1127	AA	hom	FALSE
UWOPS03-429.1	BMA	Nectar, bertam palm	Tree	Tree	Malaysia	no	B	2	euploid	Euploid	homozygous	209	19. Malaysian	University of Western Ontario, Canada (Lachance M.A.)	9	0.000221224	UWOPS03_429_1	BB	hom	FALSE
UWOPS03-433.3	BMB	Nectar, bertam palm	Tree	Tree	Malaysia	no	B	2	euploid	Euploid	homozygous	238	19. Malaysian	University of Western Ontario, Canada (Lachance M.A.)	9	0.000216665	UWOPS03-433.3	BB	hom	FALSE
UWOPS03-459.1	BMC	Nectar, bertam palm	Tree	Tree	Malaysia	no	B	2	euploid	Euploid	homozygous	314	19. Malaysian	University of Western Ontario, Canada (Lachance M.A.)	9	0.000218568	UWOPS03_459_1	BB	hom	FALSE
UWOPS03-461.4	AKM	Nectar, Bertam palm	Tree	Tree	Malaysia	no	B	2	euploid	Euploid	homozygous	200	19. Malaysian	University of Western Ontario, Canada (Lachance M.A.)	9	0.000199984	UWOPS03_461_4	BB	hom	FALSE
UWOPS05_227_2	SACE_MAL	Telok Senangin, Malaysia, Lachance M, 2005 Trigona spp (Stingless bee) collected near Bertam palm flower	Insect	Insect	Telok Senangin, Malaysia	no	B	2	euploid	Euploid	homozygous	61	19. Malaysian	University of Western Ontario, Canada (Lachance M.A.)	17	0.000128291	UWOPS05.227.2	BB	hom	FALSE
UWOPS83-787_3	SACE_GAS	Opuntia spp.	Nature	Nature	Bahamas	no	B	2	euploid	Euploid	homozygous	458	NA	University of Western Ontario, Canada (Lachance M.A.)	6	0.000353641	UWOPS83-787-3	BB	hom	FALSE
UWOPS83-883-2	ANP	Drosophila sp. from Opuntia stricta,	Insect	Insect	Navassa Island	no	B	2	euploid	Euploid	heterozygous	205	8. Mixed origin	University of Western Ontario, Canada (Lachance M.A.)	Peter	0.00392704	UWOPS83_883_2	AB	het	FALSE
UWOPS87-2421	SACE_GAT	Opuntia spp.	Nature	Nature	Hawaii	no	A	2	euploid	Euploid	homozygous	32	NA	University of Western Ontario, Canada (Lachance M.A.)	6	0.000343901	UWOPS87-2421	AA	hom	FALSE
VF8_(6)	APG	Bioethanol, Sao Joao sugar mill	Bioethanol	Bioethanol	Araras, Sao Paulo, Brazil	no	A	1	euploid	Euploid	homozygous	263	3. Brazilian bioethanol	IBB-Unesp (Ana Teresa B. F. Antonangelo )	13	0.000292499	VF8_6	AA	hom	FALSE
VKM_Y-504:S	CCN	Berries of Viburnum Burejanum	Fruit	Fruit	Russian Far East	no	B	2	euploid	Euploid	homozygous	262	18. Far East Asia	State Research Institute of Genetics and Selection of Industrial Microorganisms (Naumov G.I.)	Peter	0.000393985	VKM_Y_504_S	BB	hom	FALSE
VL5	CGR	Rice fermentation starter culture	Fermentation	Fermentation	Phan Thiet, South Vietnam	no	B	2	euploid	Euploid	heterozygous	251	26. Asian fermentation	INRA Gringnon, France (Nguyen H.V.)	Peter	0.000820289	VL5	BB	hom	FALSE
VNL3	CGH	Unknown	Unknown	Unknown	Ha Noi, North Vietnam	no	B	3	euploid	Euploid	heterozygous	268	NA	INRA Gringnon, France (Nguyen H.V.)	Peter	0.0021208	VNL3	BB	hom	FALSE
W303	SACE_GAV	Lab strain	Lab strain	Lab strain	NA	no	A	2	euploid	Euploid	homozygous	19	M. Mosaic	EUROFAN	6	4.1e-05	W303	AA	hom	FALSE
WE372_1b	ACV	Wine	Wine	Wine	South Africa	yes	A	1	aneu;+1*1;	1only	homozygous	256	1. Wine/European	Kruglyak Laboratory	1	0.000187869	WE372_1b	AA	hom	TRUE
Win-8B	CHK	Brewery	Beer	Beer	UK	no	B	2	aneu;+1*9;	Gain	heterozygous	212	8. Mixed origin	INRA Moulon, France (Sicard D.)	Peter	0.00356611	Win_8B	BB	het	FALSE
Y1	ATB	Mushroom	Nature	Nature	NA	no	A	3	euploid	Euploid	heterozygous	215	M. Mosaic	Washington University School of Medicine (Justin C Fay)	5	0.00533958	Y1	AA	het	FALSE
Y10_1b	ACI	Coconut	Fruit	Fruit	Philippines	yes	A	1	euploid	Euploid	homozygous	183	M. Mosaic	NA	1	0.00035149	Y10_1b	AA	hom	FALSE
Y12_1b	ACK	Palm wine	Palm wine	Palm wine	Ivory Coast	yes	B	1	euploid	Euploid	homozygous	223	26. Asian fermentation	Kruglyak Laboratory	1	0.000225349	Y12_1b	BB	hom	FALSE
Y3_1b	ACL	Palm wine	Palm wine	Palm wine	NA	yes	B	1	aneu;+1*12;	Gain	homozygous	212	M. Mosaic	NA	1	0.000311327	Y3_1b	BB	hom	FALSE
Y4	ATN	Fruit	Fruit	Fruit	Indonesia	no	A	2	euploid	Euploid	homozygous	235	1. Wine/European	Washington University School of Medicine (Justin C Fay)	5	0.000162156	Y4	AA	hom	FALSE
Y5	ATP	Bili wine	Palm wine	Palm wine	West Africa	no	B	2	euploid	Euploid	homozygous	348	13. African palm wine	Washington University School of Medicine (Justin C Fay)	Peter	0.00026394	Y5	BB	hom	FALSE
Y55_1b	ADA	Wine	Wine	Wine	France	yes	B	1	euploid	Euploid	homozygous	267	M. Mosaic	Kruglyak Laboratory	1	0.000333509	Y55_1b	BB	hom	FALSE
Y6_b	ADP	Unknown	Unknown	Unknown	French Guiana	no	A	2	aneu;+2*2;+2*9;+2*11;	Gain	heterozygous	267	8. Mixed origin	Kruglyak Laboratory	1	0.000536074	Y6_b	AA	hom	FALSE
Y9_4	ACM	Ragi fermentation	Fermentation	Fermentation	Indonesia	yes	B	1	euploid	Euploid	homozygous	216	26. Asian fermentation	Kruglyak Laboratory	1	0.000201294	Y9_4	BB	hom	FALSE
Y9J_1b	ADB	Wine	Wine	Wine	Japan	yes	A	1	aneu;+1*10;	Gain	homozygous	259	1. Wine/European	Kruglyak Laboratory	1	0.000249953	Y9J_1b	AA	hom	FALSE
YJM1078	SACE_YDM	Clinical	Human, clinical	Human, clinical	Portugal	no	A	2	euploid	Euploid	homozygous	48	2. Alpechin	Phaff collection	2	0.000211182	YJM1078	AA	hom	FALSE
YJM1083	SACE_YDN	Clinical	Human, clinical	Human, clinical	North Carolina, USA	no	B	2	euploid	Euploid	homozygous	350	M. Mosaic	Phaff collection	2	0.000255483	YJM1083	BB	hom	FALSE
YJM1129	SACE_YDO	Non-Clinical, segregant of NRRL Y-53 (=NRRL Y-567)	Distillery	Distillery	Ohio, USA	no	A	2	euploid	Euploid	homozygous	138	1. Wine/European	Phaff collection	2	0.000188641	YJM1129	AA	hom	FALSE
YJM1190	SACE_YBJ	Unknown	Human, clinical	Human, clinical	Michigan, USA	no	A	2	euploid	Euploid	homozygous	31	M. Mosaic	Phaff collection	2	0.000397536	YJM1190	AA	hom	FALSE
YJM1199	SACE_YBK	Unknown	Human, clinical	Human, clinical	Michigan, USA	no	A	2	euploid	Euploid	homozygous	42	M. Mosaic	Phaff collection	2	0.000270418	YJM1199	AA	hom	FALSE
YJM1202	SACE_YBL	Unknown	Human, clinical	Human, clinical	Michigan, USA	no	A	2	euploid	Euploid	homozygous	455	M. Mosaic	Phaff collection	2	0.000294485	YJM1202	AA	hom	FALSE
YJM1208	SACE_YBM	Unknown	Human, clinical	Human, clinical	Michigan, USA	no	B	2	euploid	Euploid	homozygous	142	M. Mosaic	NA	2	0.000281253	YJM1208	BB	hom	FALSE
YJM1242	SACE_YBN	Unknown	Fruit	Fruit	Illinois, USA	no	A	2	euploid	Euploid	homozygous	217	1. Wine/European	NA	2	0.000155382	YJM1242	AA	hom	FALSE
YJM1244	SACE_YBO	Unknown	Fruit	Fruit	Indonesia	no	A	2	euploid	Euploid	homozygous	58	1. Wine/European	NA	2	0.000128772	YJM1244	AA	hom	FALSE
YJM1248	SACE_YBP	Unknown	Wine	Unknown	West Africa	no	B	2	euploid	Euploid	homozygous	53	13. African palm wine	NA	2	0.000218509	YJM1248	BB	hom	FALSE
YJM1250	SACE_YBQ	Sugar cane	Nature	Nature	NA	no	A	2	euploid	Euploid	homozygous	51	NA	Phaff collection	2	0.000218487	YJM1250	AA	hom	FALSE
YJM1252	SACE_YBR	Alpechin (waste from olive oil production)	Industrial	Industrial	Spain	no	A	2	euploid	Euploid	homozygous	424	2. Alpechin	Phaff collection	2	0.000505973	YJM1252	AA	hom	FALSE
YJM1273	SACE_YBS	Quercus sp.	Tree	Tree	Pennsylvania, USA	no	B	2	euploid	Euploid	homozygous	309	23. North American oak	Phaff collection	2	0.000339381	YJM1273	BB	hom	FALSE
YJM1304	SACE_YBT	Unknown	Human, clinical	Human, clinical	Texas, USA	no	A	2	euploid	Euploid	homozygous	526	M. Mosaic	Phaff collection	2	0.000245356	YJM1304	AA	hom	FALSE
YJM1307	SACE_YBU	Unknown	Human, clinical	Human, clinical	Washington DC, USA	no	B	2	euploid	Euploid	homozygous	419	M. Mosaic	Phaff collection	2	0.000324946	YJM1307	BB	hom	FALSE
YJM1311	SACE_YBV	Unknown	Human, clinical	Human, clinical	Michigan, USA	no	A	2	euploid	Euploid	homozygous	282	NA	Phaff collection	2	0.000282242	YJM1311	AA	hom	FALSE
YJM1326	SACE_YBW	Unknown	Human, clinical	Human, clinical	Minnesota, USA	no	A	2	euploid	Euploid	homozygous	567	NA	Phaff collection	2	0.000303389	YJM1326	AA	hom	FALSE
YJM1332	SACE_YBX	Unknown	Wine	Unknown	Italy	no	A	2	euploid	Euploid	homozygous	298	1. Wine/European	Phaff collection	2	0.000155673	YJM1332	AA	hom	FALSE
YJM1336	SACE_YBY	Unknown	Wine	Unknown	Italy	no	A	2	euploid	Euploid	homozygous	402	1. Wine/European	Phaff collection	2	0.000197602	YJM1336	AA	hom	FALSE
YJM1338	SACE_YBZ	Sour fig	Fruit	Fruit	Maryland, USA	no	A	2	euploid	Euploid	homozygous	208	M. Mosaic	Phaff collection	2	0.000251337	YJM1338	AA	hom	FALSE
YJM1341	SACE_YCA	Unknown	Wine	Unknown	South Africa	no	A	2	euploid	Euploid	homozygous	66	1. Wine/European	Phaff collection	2	0.000205605	YJM1341	AA	hom	FALSE
YJM1342	SACE_YCB	Unknown	Soil	Soil	South Africa	no	B	2	euploid	Euploid	homozygous	387	NA	Phaff collection	2	0.000269639	YJM1342	BB	hom	FALSE
YJM1355	SACE_YCC	Molasses	Industrial	Industrial	Illinois, USA	no	A	2	euploid	Euploid	homozygous	334	M. Mosaic	Phaff collection	2	0.000306406	YJM1355	AA	hom	FALSE
YJM1356	SACE_YCD	Cider	Cider	Cider	NA	no	A	2	aneu;+1*1;	1only	homozygous	321	1. Wine/European	Phaff collection	2	0.000165482	YJM1356	AA	hom	TRUE
YJM1381	SACE_YCE	Rum fermentation	Distillery	Distillery	Trinidad	no	A	2	euploid	Euploid	homozygous	316	M. Mosaic	Phaff collection	2	0.00029194	YJM1381	AA	hom	FALSE
YJM1383	SACE_YCF	Coconut	Fruit	Fruit	Philippines	no	B	2	euploid	Euploid	homozygous	392	M. Mosaic	Phaff collection	2	0.000317229	YJM1383	BB	hom	FALSE
YJM1385	SACE_YCG	Sugar refinery	Industrial	Industrial	Maryland, USA	no	A	2	euploid	Euploid	homozygous	185	NA	Phaff collection	2	0.000299493	YJM1385	AA	hom	FALSE
YJM1386	SACE_YCH	Sugar cane	Nature	Nature	Jamaica	no	B	2	euploid	Euploid	homozygous	45	M. Mosaic	Phaff collection	2	0.00028389	YJM1386	BB	hom	FALSE
YJM1387	SACE_YCI	Unknown	Wine	Unknown	Japan	no	A	2	euploid	Euploid	homozygous	149	M. Mosaic	Phaff collection	2	0.000247094	YJM1387	AA	hom	FALSE
YJM1388	SACE_YCJ	Fermented tapioca	Unknown	Unknown	Malaya	no	B	2	aneu;+1*9;	Gain	homozygous	378	26. Asian fermentation	NA	2	0.000223309	YJM1388	BB	hom	FALSE
YJM1389	SACE_YCK	Sewage	Industrial	Industrial	Thailand	no	B	2	euploid	Euploid	homozygous	48	26. Asian fermentation	Phaff collection	2	0.000203458	YJM1389	BB	hom	FALSE
YJM1399	SACE_YCL	Wild cherry tree	Tree	Tree	NA	no	A	2	euploid	Euploid	homozygous	88	NA	Phaff collection	2	0.000483865	YJM1399	AA	het	FALSE
YJM1400	SACE_YCM	Guava	Fruit	Fruit	Philippines	no	B	2	euploid	Euploid	homozygous	478	24. Asian islands	Phaff collection	2	0.000351002	YJM1400	BB	hom	FALSE
YJM1401	SACE_YCN	Papaya	Fruit	Fruit	Philippines	no	B	2	euploid	Euploid	homozygous	357	NA	Phaff collection	2	0.000312754	YJM1401	BB	hom	FALSE
YJM1402	SACE_YCO	Wine	Wine	Wine	NA	no	B	2	euploid	Euploid	homozygous	154	NA	Phaff collection	2	0.000381618	YJM1402	BB	hom	FALSE
YJM1415	SACE_YCP	Wine	Wine	Wine	France	no	A	2	euploid	Euploid	homozygous	410	1. Wine/European	Phaff collection	2	0.000158103	YJM1415	AA	hom	FALSE
YJM1417	SACE_YCQ	Cider	Cider	Cider	NA	no	A	2	euploid	Euploid	homozygous	472	1. Wine/European	Phaff collection	2	0.000150337	YJM1417	AA	hom	FALSE
YJM1418	SACE_YCR	Quercus sp.	Tree	Tree	Japan	no	B	2	euploid	Euploid	homozygous	502	18. Far East Asia	Phaff collection	2	0.000368464	YJM1418	BB	hom	FALSE
YJM1419	SACE_YCS	Bagasse	Unknown	Unknown	NA	no	B	2	euploid	Euploid	homozygous	55	M. Mosaic	NA	2	0.00026307	YJM1419	BB	hom	FALSE
YJM1433	SACE_YCT	Wine	Wine	Wine	France	no	A	2	euploid	Euploid	homozygous	46	M. Mosaic	NA	2	0.000201118	YJM1433	AA	hom	FALSE
YJM1434	SACE_YCU	Oak	Tree	Tree	Pennsylvania, USA	no	B	2	euploid	Euploid	homozygous	291	23. North American oak	NA	2	0.000351772	YJM1434	BB	hom	FALSE
YJM1439	SACE_YCV	Ginger beer	Beer	Beer	West Africa	no	B	2	aneu;+1*8;	Gain	homozygous	36	13. African palm wine	NA	2	0.000209102	YJM1439	BB	hom	FALSE
YJM1443	SACE_YCW	Fruit	Fruit	Fruit	Bahamas	no	B	2	euploid	Euploid	homozygous	47	NA	NA	2	0.00032593	YJM1443	BB	hom	FALSE
YJM1444	SACE_YCX	Cladode	Nature	Nature	Hawaii	no	A	2	euploid	Euploid	homozygous	38	NA	NA	2	0.000293209	YJM1444	AA	hom	FALSE
YJM1447	SACE_YCY	Bertam Palm	Tree	Tree	Malaysia	no	B	2	euploid	Euploid	homozygous	52	19. Malaysian	NA	2	0.000298192	YJM1447	BB	hom	FALSE
YJM145_b	AAS	AIDS patient	Human, clinical	Human, clinical	USA	yes	A	1	euploid	Euploid	homozygous	177	M. Mosaic	Kruglyak Laboratory	1	0.000267969	YJM145_b	AA	hom	FALSE
YJM1450	SACE_YCZ	Clinical	Human, clinical	Human, clinical	Kansas, USA	no	A	2	euploid	Euploid	homozygous	75	M. Mosaic	NA	2	0.000269001	YJM1450	AA	hom	FALSE
YJM1460	SACE_YDA	Palm Wine	Palm wine	Palm wine	Newcastle, UK	no	B	2	euploid	Euploid	homozygous	219	26. Asian fermentation	NA	2	0.000262304	YJM1460	BB	hom	FALSE
YJM1463	SACE_YDB	White Tecc	Unknown	Unknown	Africa	no	B	2	euploid	Euploid	homozygous	184	NA	NA	2	0.000276715	YJM1463	BB	hom	FALSE
YJM1477	SACE_YDC	Blatz beer	Beer	Beer	Ethiopia	no	A	2	euploid	Euploid	homozygous	295	1. Wine/European	NA	2	0.000161964	YJM1477	AA	hom	FALSE
YJM1478	SACE_YDD	Kefyr	Fermentation	Fermentation	Missouri, USA	no	A	2	euploid	Euploid	homozygous	331	7. Mosaic beer	NA	2	0.00023068	YJM1478	AA	hom	FALSE
YJM1479	SACE_YDE	Coconut tuba	Palm wine	Palm wine	Phillipines	no	B	2	euploid	Euploid	homozygous	129	24. Asian islands	NA	2	0.000336121	YJM1479	BB	hom	FALSE
YJM1526	SACE_YDF	Clinical (throat)	Human, clinical	Human, clinical	NA	no	A	2	euploid	Euploid	homozygous	251	1. Wine/European	NA	2	0.000183133	YJM1526	AA	hom	FALSE
YJM1527	SACE_YDG	Prune	Fruit	Fruit	California, USA	no	A	2	euploid	Euploid	homozygous	65	M. Mosaic	NA	2	0.000313565	YJM1527	AA	het	FALSE
YJM1549	SACE_YDH	Fermenting fruit juice	Fermentation	Fermentation	Netherlands	no	B	2	aneu;+1*1;+1*6;+1*11;	Gain	homozygous	233	M. Mosaic	NA	2	0.000393197	YJM1549	BB	hom	FALSE
YJM1573	SACE_YDI	Fermented food	Unknown	Unknown	India	no	B	2	euploid	Euploid	homozygous	118	NA	NA	2	0.00033944	YJM1573	BB	hom	FALSE
YJM1574	SACE_YDJ	wine/European	Wine	Wine	NA	no	A	2	aneu;+1*1;+1*6;	Gain	homozygous	302	1. Wine/European	NA	2	0.000174249	YJM1574	AA	hom	FALSE
YJM1592	SACE_YDK	Sewage	Industrial	Industrial	Thailand	no	B	2	euploid	Euploid	homozygous	49	26. Asian fermentation	NA	2	0.000205322	YJM1592	BB	hom	FALSE
YJM1615	SACE_YDL	Clinical	Human, clinical	Human, clinical	California, USA	no	B	2	euploid	Euploid	homozygous	95	M. Mosaic	NA	2	0.000273386	YJM1615	NA	het	FALSE
YJM189	SACE_YAA	Unknown	Distillery	Distillery	NA	no	A	2	euploid	Euploid	homozygous	167	1. Wine/European	Phaff collection	2	0.000158226	YJM189	AA	hom	FALSE
YJM193	SACE_YAB	Unknown	Distillery	Distillery	NA	no	A	2	euploid	Euploid	homozygous	42	7. Mosaic beer	Phaff collection	2	0.000194103	YJM193	AA	hom	FALSE
YJM195	SACE_YAC	Palm wine	Palm wine	Palm wine	Nigeria	no	B	2	euploid	Euploid	homozygous	68	13. African palm wine	Phaff collection	2	0.000266222	YJM195	BB	hom	FALSE
YJM244	SACE_YAD	Human	Human, clinical	Human, clinical	Romania	no	A	2	euploid	Euploid	homozygous	91	1. Wine/European	Phaff collection	2	0.000142641	YJM244	AA	hom	FALSE
YJM248	SACE_YAE	Faeces	Human	Human	NA	no	A	2	euploid	Euploid	homozygous	59	2. Alpechin	Phaff collection	2	0.000323433	YJM248	AA	hom	FALSE
YJM269_1b	ACN	Red Blauer Portugieser grapes	Wine	Fruit	Austria	yes	A	1	euploid	Euploid	homozygous	191	M. Mosaic	Kruglyak Laboratory	1	0.000111714	YJM269_1b	AA	hom	FALSE
YJM270	SACE_YAF	Unknown	Wine	Unknown	Slovenia	no	A	2	euploid	Euploid	homozygous	84	1. Wine/European	Phaff collection	2	0.000139972	YJM270	AA	hom	FALSE
YJM271	SACE_YAG	Brewery	Beer	Beer	NA	no	B	2	euploid	Euploid	homozygous	52	7. Mosaic beer	Phaff collection	2	0.000175858	YJM271	BB	hom	FALSE
YJM280_b	AAT	Peritoneal fluid	Human, clinical	Human, clinical	USA	yes	A	1	aneu;+1*1;	1only	homozygous	201	M. Mosaic	Kruglyak Laboratory	1	0.00035467	YJM280_b	AA	hom	TRUE
YJM308	ATC	Clinical	Human, clinical	Human, clinical	NA	no	B	2	aneu;+1*11;	Gain	heterozygous	200	M. Mosaic	Washington University School of Medicine (Justin C Fay)	5	0.00325883	YJM308	AB	het	FALSE
YJM320b	AAV	Blood	Human, clinical	Human, clinical	California, USA	yes	A	1	euploid	Euploid	homozygous	188	M. Mosaic	Kruglyak Laboratory	1	0.000321328	YJM320b	AA	hom	FALSE
YJM326_b	ABA	Human, clinical	Human, clinical	Human, clinical	California, USA	yes	B	1	euploid	Euploid	homozygous	217	M. Mosaic	Kruglyak Laboratory	1	0.000297619	YJM326_b	BB	hom	FALSE
YJM339	ATD	Clinical	Human, clinical	Human, clinical	NA	no	A	2	euploid	Euploid	homozygous	201	M. Mosaic	Washington University School of Medicine (Justin C Fay)	5	0.000271155	YJM339	AA	hom	FALSE
YJM413_b	ABB	Blood	Human, clinical	Human, clinical	USA	yes	B	1	euploid	Euploid	homozygous	197	26. Asian fermentation	Kruglyak Laboratory	1	0.000231119	YJM413_b	BB	hom	FALSE
YJM421_b	ABC	Ascites fluid	Human, clinical	Human, clinical	USA	yes	B	1	euploid	Euploid	homozygous	204	M. Mosaic	NA	1	0.000301712	YJM421_b	BB	hom	FALSE
YJM428_1b	ABD	Paracenteis fluid	Human, clinical	Human, clinical	California, USA	no	B	2	aneu;+2*16;	Gain	homozygous	206	M. Mosaic	Kruglyak Laboratory	1	0.000294225	YJM428_1b	BB	hom	FALSE
YJM434_1b	ABE	Human, clinical	Human, clinical	Human, clinical	NA	yes	A	1	euploid	Euploid	homozygous	197	1. Wine/European	Kruglyak Laboratory	1	0.000164548	YJM434_1b	AA	hom	FALSE
YJM436_1b	ABF	Mouth	Human, clinical	Human, clinical	NA	yes	B	1	euploid	Euploid	homozygous	183	M. Mosaic	Kruglyak Laboratory	1	0.000320658	YJM436_1b	BB	hom	FALSE
YJM440_1b	ABG	Human, clinical	Human, clinical	Human, clinical	NA	yes	B	1	euploid	Euploid	homozygous	177	M. Mosaic	Kruglyak Laboratory	1	0.000327533	YJM440_1b	BB	hom	FALSE
YJM450	SACE_YAK	Unknown	Human, clinical	Human, clinical	California, USA	no	A	2	euploid	Euploid	homozygous	153	M. Mosaic	Phaff collection	2	0.000275634	YJM450	AA	hom	FALSE
YJM451	SACE_YAL	Unknown	Human, clinical	Human, clinical	NA	no	B	2	euploid	Euploid	homozygous	51	M. Mosaic	NA	2	0.00025507	YJM451	BB	hom	FALSE
YJM453	SACE_YAM	Unknown	Human, clinical	Human, clinical	NA	no	A	2	euploid	Euploid	homozygous	82	1. Wine/European	Phaff collection	2	0.000183024	YJM453	AA	hom	FALSE
YJM454_1b	ABH	Human, clinical	Human, clinical	Human, clinical	NA	yes	B	1	euploid	Euploid	homozygous	183	M. Mosaic	Kruglyak Laboratory	1	0.000320154	YJM454_1b	BB	hom	FALSE
YJM456	SACE_YAN	Unknown	Human, clinical	Human, clinical	California, USA	no	A	2	euploid	Euploid	homozygous	108	M. Mosaic	Phaff collection	2	0.00034307	YJM456	BB	hom	FALSE
YJM541	SACE_YAP	Unknown	Human, clinical	Human, clinical	California, USA	no	A	2	aneu;+1*9;	Gain	homozygous	73	M. Mosaic	Phaff collection	2	0.000278052	YJM541	AA	hom	FALSE
YJM554	SACE_YAQ	Unknown	Human, clinical	Human, clinical	California, USA	no	A	2	euploid	Euploid	homozygous	69	M. Mosaic	Phaff collection	2	0.000290354	YJM554	AA	hom	FALSE
YJM555	SACE_YAR	Unknown	Human, clinical	Human, clinical	California, USA	no	B	2	euploid	Euploid	homozygous	131	M. Mosaic	Phaff collection	2	0.00037319	YJM555	BB	hom	FALSE
YJM627	ATE	Seg. Y55	Unknown	Unknown	France	no	B	2	euploid	Euploid	homozygous	256	M. Mosaic	Washington University School of Medicine (Justin C Fay)	5	0.00034108	YJM627	BB	hom	FALSE
YJM653_1b	ABI	Brochoalveolar lavage	Human, clinical	Human, clinical	USA	yes	A	1	euploid	Euploid	homozygous	208	M. Mosaic	Kruglyak Laboratory	1	0.000322968	YJM653_1b	AA	hom	FALSE
YJM678_1b	ABK	Unknown	Human, clinical	Human, clinical	NA	yes	A	1	euploid	Euploid	homozygous	202	M. Mosaic	Kruglyak Laboratory	1	0.000302276	YJM678_1b	AA	hom	FALSE
YJM681	SACE_YAT	Unknown	Human, clinical	Human, clinical	California, USA	no	A	2	euploid	Euploid	homozygous	44	M. Mosaic	Phaff collection	2	0.000233234	YJM681	AA	hom	FALSE
YJM682	SACE_YAU	Unknown	Human, clinical	Human, clinical	Texas, USA	no	A	2	euploid	Euploid	homozygous	67	M. Mosaic	Phaff collection	2	0.000308936	YJM682	AA	hom	FALSE
YJM683	SACE_YAV	Unknown	Human, clinical	Human, clinical	Texas, USA	no	B	2	euploid	Euploid	homozygous	106	M. Mosaic	Phaff collection	2	0.000288918	YJM683	BB	hom	FALSE
YJM689	SACE_YAW	Unknown	Human, clinical	Human, clinical	Texas, USA	no	B	2	euploid	Euploid	homozygous	36	M. Mosaic	Phaff collection	2	0.000253871	YJM689	BB	hom	FALSE
YJM693	SACE_YAX	Unknown	Human, clinical	Human, clinical	Texas, USA	no	A	2	euploid	Euploid	homozygous	40	NA	Phaff collection	2	0.000284354	YJM693	AA	hom	FALSE
YJM969	SACE_YAY	Unknown	Human, clinical	Human, clinical	Italy	no	A	2	euploid	Euploid	homozygous	25	1. Wine/European	Phaff collection	2	0.000124679	YJM969	AA	hom	FALSE
YJM972	SACE_YAZ	Unknown	Human, clinical	Human, clinical	Italy	no	A	2	euploid	Euploid	homozygous	71	1. Wine/European	Phaff collection	2	0.000132254	YJM972	AA	hom	FALSE
YJM975	SACE_YBA	Vagina	Human, clinical	Human, clinical	Italy	no	A	2	euploid	Euploid	homozygous	36	1. Wine/European	Phaff collection	2	0.000123891	YJM975	AA	hom	FALSE
YJM978	SACE_YBB	Vagina	Human, clinical	Human, clinical	Italy	no	A	2	euploid	Euploid	homozygous	64	1. Wine/European	Phaff collection	2	0.000144387	YJM978	AA	hom	FALSE
YJM980	SACE_YBF	Unknown	Human, clinical	Human, clinical	Italy	no	A	2	euploid	Euploid	homozygous	41	1. Wine/European	Phaff collection	2	NA	N/A	NA	het	FALSE
YJM981_b	ADI	Vagina	Human, clinical	Human, clinical	Italy	yes	A	1	euploid	Euploid	homozygous	220	1. Wine/European	Phaff collection	1	0.000163308	YJM981_b	AA	hom	FALSE
YJM984	BMH	Vagina	Human, clinical	Human, clinical	Italy	no	A	2	euploid	Euploid	homozygous	196	1. Wine/European	Phaff collection (McCusker)	2	9.22e-05	YJM984	AA	hom	FALSE
YJM987	SACE_YBE	Unknown	Human, clinical	Human, clinical	Italy	no	A	2	euploid	Euploid	homozygous	114	1. Wine/European	Phaff collection	2	0.000148141	YJM987	AA	hom	FALSE
YJM989	BMI	Vagina	Human, clinical	Human, clinical	Italy	no	A	2	euploid	Euploid	homozygous	219	1. Wine/European	Phaff collection (McCusker)	2	0.000159404	YJM989	AA	hom	FALSE
YJM990	BMK	Vagina	Human, clinical	Human, clinical	Italy	no	A	2	euploid	Euploid	homozygous	350	1. Wine/European	Phaff collection (McCusker)	10	0.000160187	YJM990	AA	hom	FALSE
YJM993	SACE_YBG	Unknown	Human, clinical	Human, clinical	Italy	no	A	2	euploid	Euploid	homozygous	122	1. Wine/European	Phaff collection	2	0.000149016	YJM993	AA	hom	FALSE
YJM996	SACE_YBH	Unknown	Human, clinical	Human, clinical	Italy	no	A	2	euploid	Euploid	homozygous	24	1. Wine/European	Phaff collection	2	0.000169031	YJM996	AA	hom	FALSE
YPS1000_1b	ACC	Exudate from Quercus sp.	Tree	Tree	USA	yes	B	1	euploid	Euploid	homozygous	245	21. Ecuadorean	NA	1	0.000358159	YPS1000_1b	BB	hom	FALSE
YPS1009_b	ADF	Exudate from Quercus sp.	Tree	Tree	USA	yes	B	1	euploid	Euploid	homozygous	271	13. African palm wine	Kruglyak Laboratory	1	0.000298939	YPS1009_b	BB	hom	FALSE
YPS128	AKN	Soil beneath Quercus alba	Soil	Soil	Pennsylvania, USA	no	B	2	euploid	Euploid	homozygous	245	23. North American oak	YPS collection / University of Pennsylvania, USA (Snigowski P.)	27	0.000346663	YPS128	BB	hom	FALSE
YPS129	ANC	Flux from Quercus alba	Tree	Tree	Pennsylvania, USA	no	B	2	euploid	Euploid	homozygous	226	23. North American oak	YPS collection / University of Pennsylvania, USA (Snigowski P.)	27	0.000356043	YPS129	BB	hom	FALSE
YPS133	AND	Soil beneath Quercus alba	Soil	Soil	Pennsylvania, USA	no	B	2	euploid	Euploid	homozygous	238	23. North American oak	YPS collection / University of Pennsylvania, USA (Snigowski P.)	27	0.000362719	YPS133	BB	hom	FALSE
YPS134	ANE	Soil beneath Quercus velutina	Soil	Soil	Pennsylvania, USA	no	B	2	euploid	Euploid	homozygous	193	23. North American oak	YPS collection / University of Pennsylvania, USA (Snigowski P.)	27	0.000346505	YPS134	BB	hom	FALSE
YPS139	ANF	Soil beneath unidentified Quercus sp.	Soil	Soil	Pennsylvania, USA	no	B	2	euploid	Euploid	homozygous	183	23. North American oak	YPS collection / University of Pennsylvania, USA (Snigowski P.)	27	0.00035633	YPS139	BB	hom	FALSE
YPS141	ANG	Soil beneath Quercus velutina	Soil	Soil	Pennsylvania, USA	no	B	2	euploid	Euploid	homozygous	215	23. North American oak	YPS collection / University of Pennsylvania, USA (Snigowski P.)	27	0.000339904	YPS141	BB	hom	FALSE
YPS142	ANH	Bark of q.rubra	Nature	Nature	Pennsylvania, USA	no	B	2	euploid	Euploid	homozygous	202	23. North American oak	YPS collection / University of Pennsylvania, USA (Snigowski P.)	27	0.000355932	YPS142	BB	hom	FALSE
YPS143	ANI	Soil beneath(q.rubra)	Soil	Soil	Pennsylvania, USA	no	B	2	euploid	Euploid	homozygous	272	23. North American oak	YPS collection / University of Pennsylvania, USA (Snigowski P.)	27	0.000367458	YPS143	BB	hom	FALSE
YPS154	ANK	Bark of q.velutina	Tree	Tree	Pennsylvania, USA	no	B	2	euploid	Euploid	homozygous	224	23. North American oak	YPS collection / University of Pennsylvania, USA (Snigowski P.)	27	0.0003545	YPS154	BB	hom	FALSE
YPS163	AVI	Soil beneath Quercus rubra	Soil	Soil	Pennsylvanian	no	B	2	euploid	Euploid	homozygous	167	23. North American oak	YPS collection / University of Pennsylvania, USA (Snigowski P.)	27	0.000352495	YPS163	BB	hom	FALSE
YPS163_1b	ACD	Exudate from Quercus sp.	Tree	Tree	USA	yes	B	1	euploid	Euploid	homozygous	202	23. North American oak	Kruglyak Laboratory	1	0.000354949	YPS163_1b	BB	hom	FALSE
YPS615	CMP	Quercus sp.	Tree	Tree	Pennsylvania, USA	no	B	2	euploid	Euploid	homozygous	111	21. Ecuadorean	YPS collection / University of Pennsylvania, USA (Snigowski P.)	Peter	0.000359023	YPS615	BB	hom	FALSE
YPS617	CMQ	Quercus sp.	Tree	Tree	Pennsylvania, USA	no	B	2	euploid	Euploid	homozygous	160	21. Ecuadorean	YPS collection / University of Pennsylvania, USA (Snigowski P.)	Peter	0.000373775	YPS617	BB	hom	FALSE
YPS670	CMS	Quercus sp.	Tree	Tree	Pennsylvania, USA	no	B	2	euploid	Euploid	homozygous	211	NA	YPS collection / University of Pennsylvania, USA (Snigowski P.)	Peter	0.000374531	YPS670	BB	hom	FALSE
YS10(E)	APK	Baker's yeast	Bakery	Bakery	South Africa	no	B	3	euploid	Euploid	heterozygous	240	8. Mixed origin	Macquarie University (Philip Bell)	18	0.00480201	YS10_E_	AB	het	FALSE
YS11(E)	APL	type yeasts of the species Saccharomyces cerevisiae in different sugar media\\\\\\\\", Letters in Applied Microbiology 2001"	Bakery	Bakery	Turkey	no	B	2	euploid	Euploid	heterozygous	204	8. Mixed origin	Macquarie University (Philip Bell)	18	0.00361612	YS11_E_	AB	het	FALSE
YS15	APM	type yeasts of the species Saccharomyces cerevisiae in different sugar media\\\\\\\\", Letters in Applied Microbiology 2001"	Bakery	Bakery	Korea	no	B	2	aneu;+1*9;	Gain	heterozygous	215	8. Mixed origin	Macquarie University (Philip Bell)	18	0.00276292	YS15	BB	hom	FALSE
YS19	APN	type yeasts of the species Saccharomyces cerevisiae in different sugar media\\\\\\\\", Letters in Applied Microbiology 2001"	Bakery	Bakery	Philippines	no	B	3	aneu;+1*1;	1only	heterozygous	272	8. Mixed origin	Macquarie University (Philip Bell)	18	0.00468565	YS19	AB	het	TRUE
YS20	API	type yeasts of the species Saccharomyces cerevisiae in different sugar media\\\\\\\\", Letters in Applied Microbiology 2001"	Bakery	Bakery	Korea	no	B	2	aneu;+1*8;+1*9;	Gain	heterozygous	224	8. Mixed origin	Macquarie University (Philip Bell)	18	0.00339537	YS20	AB	het	FALSE
YS22(E)	BTF	type yeasts of the species Saccharomyces cerevisiae in different sugar media\\\\\\\\", Letters in Applied Microbiology 2001"	Bakery	Bakery	NA	no	B	2	aneu;+1*1;+1*9;	Gain	heterozygous	407	8. Mixed origin	Macquarie University (Philip Bell)	18	0.00293772	YS22_E_	BB	hom	FALSE
YS5(E)	BTD	type yeasts of the species Saccharomyces cerevisiae in different sugar media\\\\\\\\", Letters in Applied Microbiology 2001"	Bakery	Bakery	NA	no	B	4	aneu;+1*10;	Gain	heterozygous	90	8. Mixed origin	Macquarie University (Philip Bell)	18	0.00593678	YS5_E	AB	het	FALSE
YS8(E)	BTE	type yeasts of the species Saccharomyces cerevisiae in different sugar media\\\\\\\\", Letters in Applied Microbiology 2001"	Bakery	Bakery	NA	no	B	4	euploid	Euploid	heterozygous	282	8. Mixed origin	Macquarie University (Philip Bell)	18	0.00642977	YS8_E	AB	het	FALSE
ZP_567	BTG	Quercus pyrenaica	Tree	Tree	Portugal, Castelo de Vide,	no	A	2	euploid	Euploid	homozygous	221	4. Mediterranean oak	Faculdade de Ci¬ências e Tecnologia of Universidade NOVA de Lisboa (FCT-NOVA)(Jos≈Ω Paulo Sampaio)	Peter	0.00375341	ZP_567	AA	hom	FALSE
ZP_577	BTH	Quercus faginea	Tree	Tree	Portugal, Aldeia das Dez, S. Estrela,	no	A	2	euploid	Euploid	homozygous	324	1. Wine/European	Faculdade de Ci¬ências e Tecnologia of Universidade NOVA de Lisboa (FCT-NOVA)(Jos≈Ω Paulo Sampaio)	Peter	0.00311056	ZP_577	AA	hom	FALSE
ZP_611	BTI	Quercus robur	Tree	Tree	Canada, Vancouver,	no	B	2	euploid	Euploid	homozygous	315	M. Mosaic	Faculdade de Ci¬ências e Tecnologia of Universidade NOVA de Lisboa (FCT-NOVA)(Jos≈Ω Paulo Sampaio)	Peter	0.000280723	ZP_611	BB	hom	FALSE
